# Supplementary material
Source: publisher site journal article supplement (https://www.dovepress.com/article/580906)
Supplement: Supplementary file 1 [file 580906%20Revised%20Supplementary%20materials.docx]

**
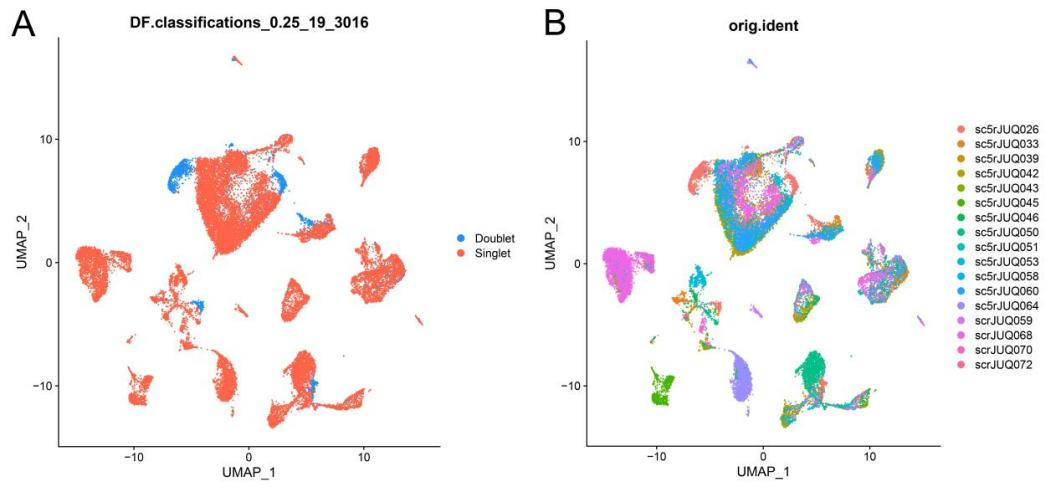
**

**Supplementary Figure 1:**

(A) Doublet_umap. (B) sample_umap


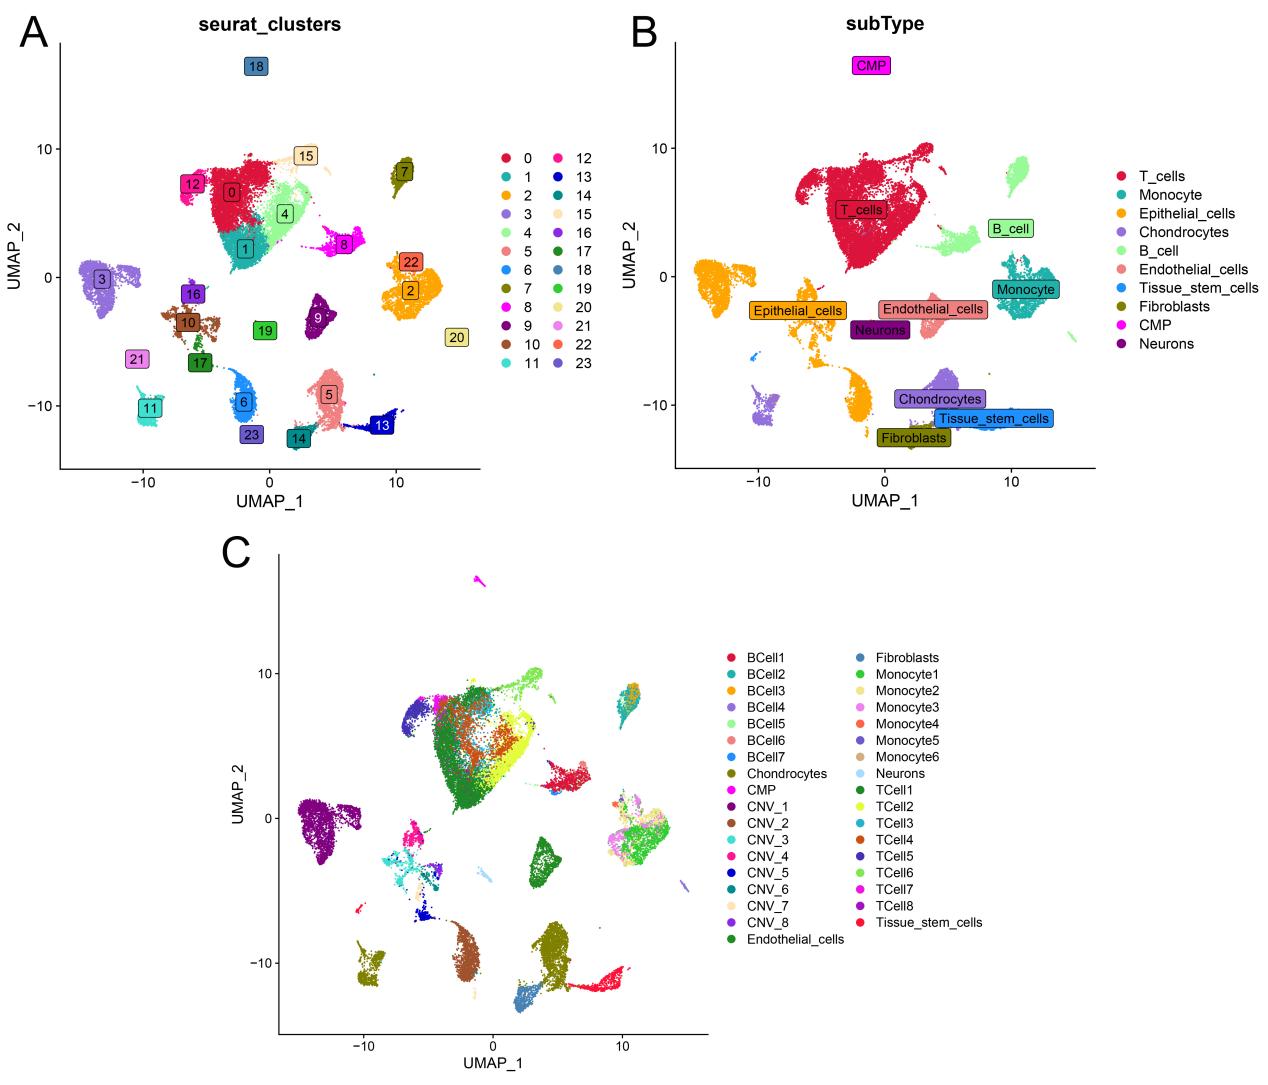
**Supplementary Figure 2:UMAP shows the main cell types in different clusters**

(A) UMAP visualization of 24 major cell clusters.

(B) UMAP visualization of 10 major cell types of cells.

(C) UMAP visualization of 40 subpopulations of cells.

**
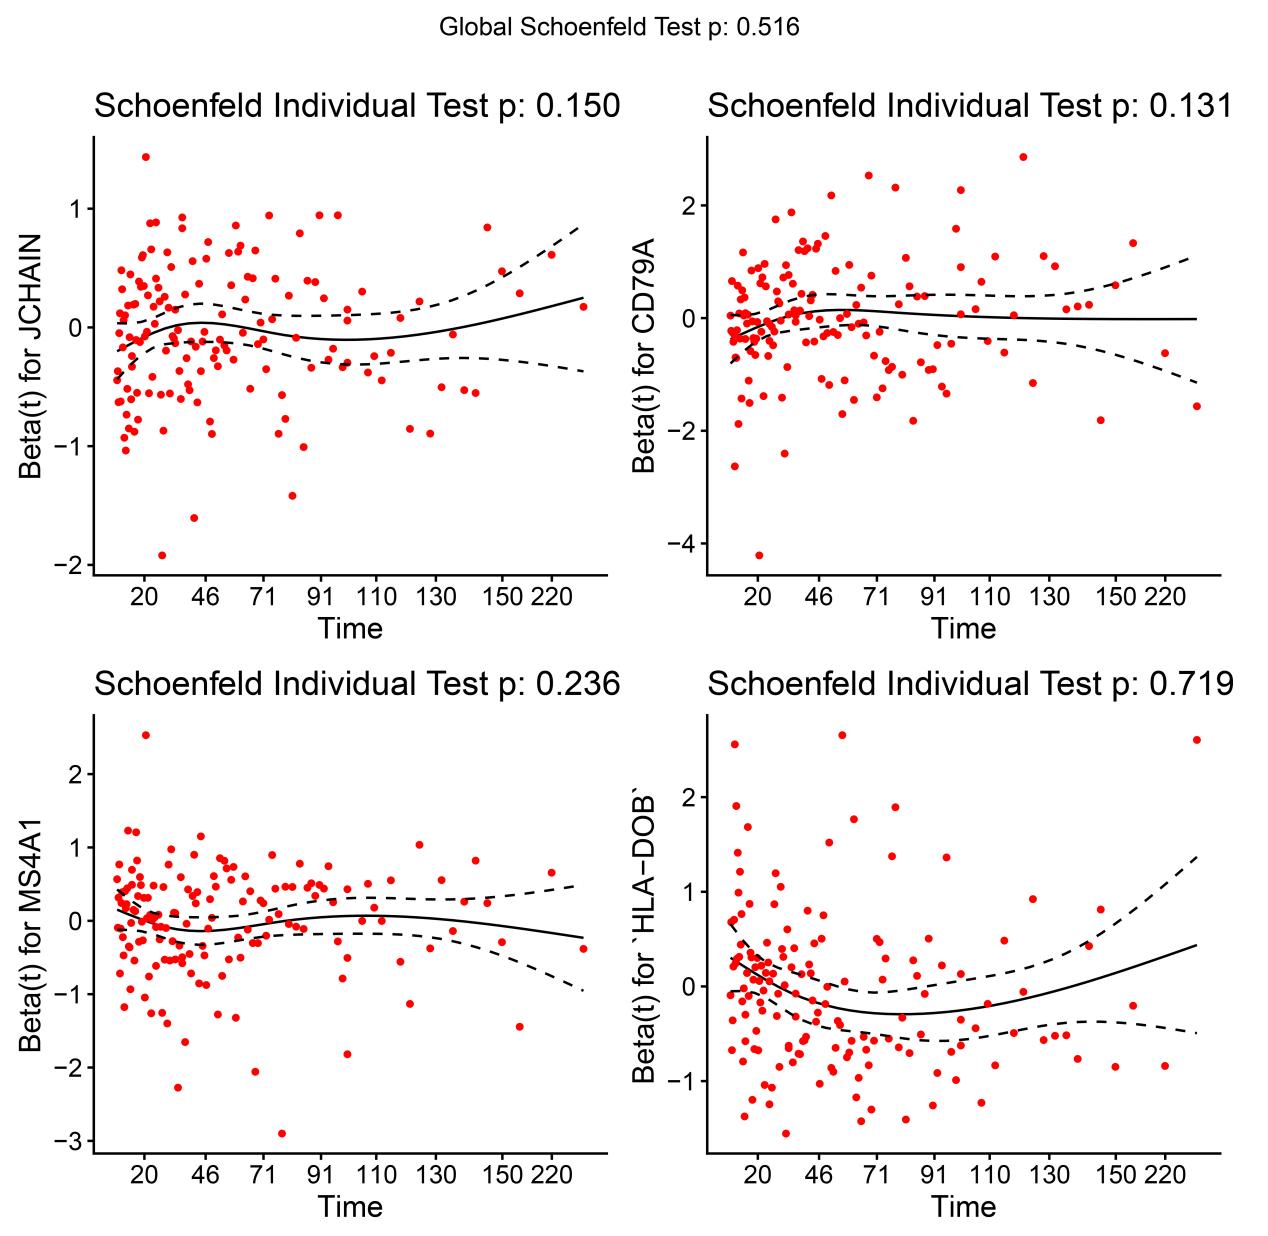
**

**Supplementary Figure 3. Schoenfeld residual test to assess whether the genes included in the model met the proportional hazards assumption**

**
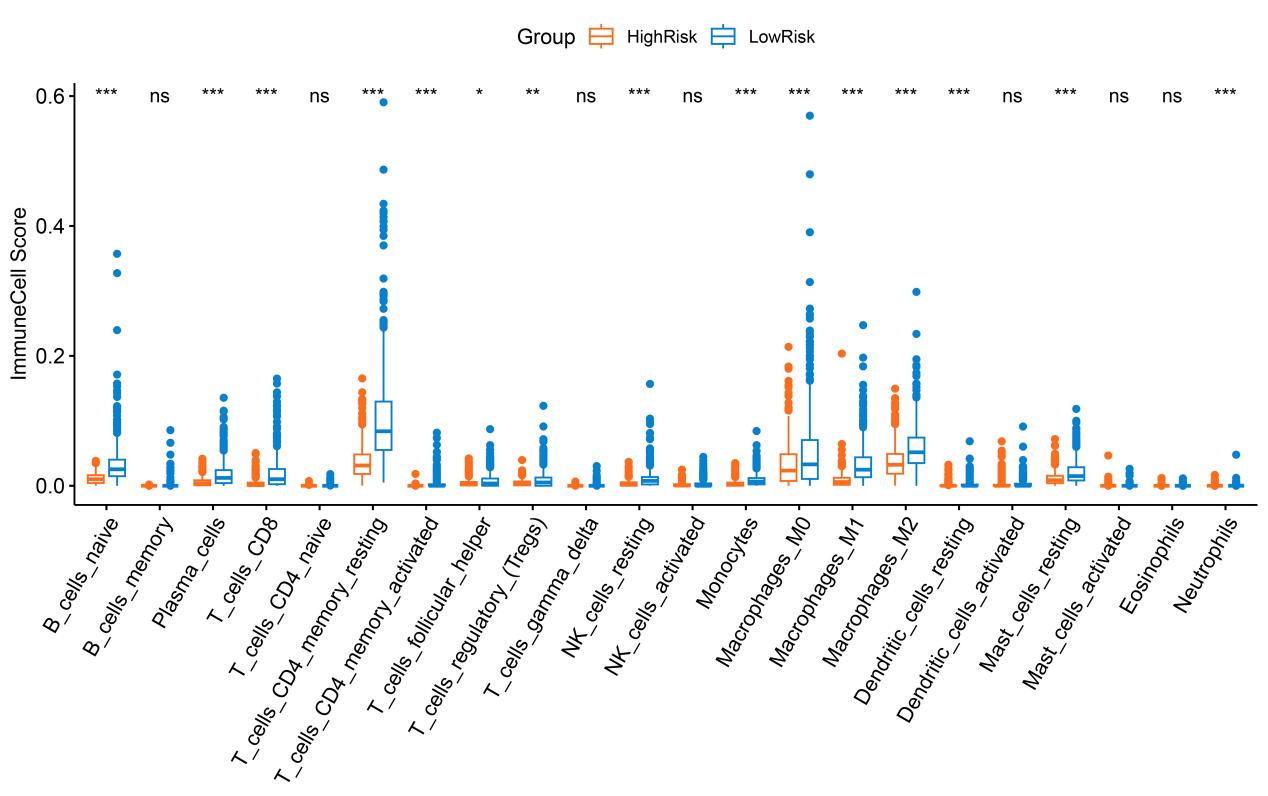
**

**Supplementary Figure 4. The box plot shows the differences in immune cell scores calculated with CIBERSORT-ABS deconvolution algorithm between the high-risk and low-risk groups.**

**
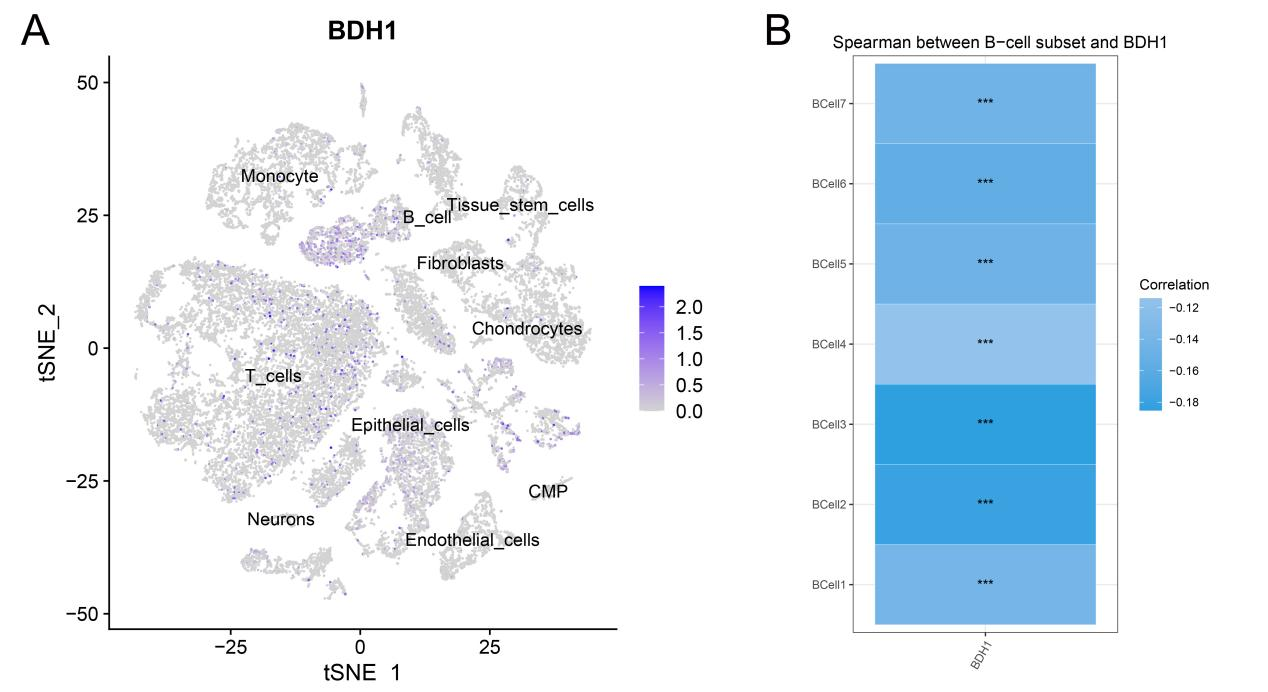
**

**Supplementary Figure 5**

1. UMAP visualization of BDH1 expression in 10 major cell clusters.

(B) The correlation heatmap illustrates the correlation between enrichment of B cell subsets in BC samples (calculated by ssGSEA) and the expression of BDH1.****P*<0.001.

**Supplementary Table 1: subcluster-specific markers**

|  | p_val | avg_log2FC | pct.1 | pct.2 | p_val_adj | cluster | gene | pct.1.5 |
| --- | --- | --- | --- | --- | --- | --- | --- | --- |
| IGHV3-23 | 0 | 7.56 | 0.41 | 0.07 | 0 | BCell1 | IGHV3-23 | 0.08 |
| IGKV4-1 | 0 | 6.90 | 0.49 | 0.07 | 0 | BCell1 | IGKV4-1 | 0.08 |
| IGLV3-1 | 0 | 6.30 | 0.65 | 0.04 | 0 | BCell1 | IGLV3-1 | 0.06 |
| JCHAIN | 0 | 5.48 | 0.81 | 0.06 | 0 | BCell1 | JCHAIN | 0.08 |
| IGHG2 | 0 | 4.73 | 0.65 | 0.05 | 0 | BCell1 | IGHG2 | 0.07 |
| IGHM | 0 | 4.61 | 0.47 | 0.08 | 0 | BCell1 | IGHM | 0.09 |
| IGHG4 | 0 | 4.20 | 0.70 | 0.04 | 0 | BCell1 | IGHG4 | 0.06 |
| IGLC3 | 0 | 4.12 | 0.43 | 0.06 | 0 | BCell1 | IGLC3 | 0.07 |
| IGLL5 | 0 | 3.97 | 0.66 | 0.03 | 0 | BCell1 | IGLL5 | 0.05 |
| IGKV1-12 | 0 | 3.54 | 0.46 | 0.03 | 0 | BCell1 | IGKV1-12 | 0.05 |
| CD79A | 0 | 1.94 | 0.84 | 0.07 | 0 | BCell1 | CD79A | 0.09 |
| POU2AF1 | 0 | 1.24 | 0.67 | 0.05 | 0 | BCell1 | POU2AF1 | 0.07 |
| TXNDC5 | 0 | 1.16 | 0.51 | 0.03 | 0 | BCell1 | TXNDC5 | 0.04 |
| FCRL5 | 0 | 1.13 | 0.60 | 0.02 | 0 | BCell1 | FCRL5 | 0.04 |
| TNFRSF17 | 0 | 1.07 | 0.56 | 0.01 | 0 | BCell1 | TNFRSF17 | 0.03 |
| CD38 | 0 | 1.07 | 0.67 | 0.08 | 0 | BCell1 | CD38 | 0.10 |
| RP11-290F5.1 | 0 | 1.05 | 0.47 | 0.01 | 0 | BCell1 | RP11-290F5.1 | 0.02 |
| JSRP1 | 0 | 1.05 | 0.41 | 0.01 | 0 | BCell1 | JSRP1 | 0.03 |
| RP11-16E12.2 | 0 | 0.86 | 0.48 | 0.01 | 0 | BCell1 | RP11-16E12.2 | 0.02 |
| IRF4 | 0 | 0.85 | 0.41 | 0.04 | 0 | BCell1 | IRF4 | 0.05 |
| SPAG4 | 0 | 0.80 | 0.52 | 0.03 | 0 | BCell1 | SPAG4 | 0.05 |
| CPNE5 | 0 | 0.75 | 0.51 | 0.03 | 0 | BCell1 | CPNE5 | 0.05 |
| SLAMF7 | 0 | 0.68 | 0.55 | 0.06 | 0 | BCell1 | SLAMF7 | 0.08 |
| EAF2 | 0 | 0.68 | 0.50 | 0.06 | 0 | BCell1 | EAF2 | 0.08 |
| AC093818.1 | 0 | 0.56 | 0.41 | 0.03 | 0 | BCell1 | AC093818.1 | 0.04 |
| MEI1 | 0 | 0.54 | 0.50 | 0.07 | 0 | BCell1 | MEI1 | 0.09 |
| MS4A1 | 0 | 3.72 | 0.93 | 0.03 | 0 | BCell2 | MS4A1 | 0.06 |
| CD79A1 | 0 | 3.26 | 0.91 | 0.07 | 0 | BCell2 | CD79A | 0.09 |
| BANK1 | 0 | 2.51 | 0.77 | 0.02 | 0 | BCell2 | BANK1 | 0.04 |
| VPREB3 | 0 | 1.98 | 0.54 | 0.01 | 0 | BCell2 | VPREB3 | 0.03 |
| CD19 | 0 | 1.93 | 0.61 | 0.02 | 0 | BCell2 | CD19 | 0.04 |
| ADAM28 | 0 | 1.80 | 0.58 | 0.06 | 0 | BCell2 | ADAM28 | 0.08 |
| ARHGAP24 | 0 | 1.71 | 0.56 | 0.06 | 0 | BCell2 | ARHGAP24 | 0.08 |
| BLK | 0 | 1.68 | 0.56 | 0.01 | 0 | BCell2 | BLK | 0.03 |
| FCRLA | 0 | 1.54 | 0.50 | 0.01 | 0 | BCell2 | FCRLA | 0.03 |
| HVCN1 | 0 | 1.53 | 0.54 | 0.07 | 0 | BCell2 | HVCN1 | 0.08 |
| IRF8 | 0 | 1.51 | 0.55 | 0.07 | 0 | BCell2 | IRF8 | 0.09 |
| LINC00926 | 0 | 1.47 | 0.44 | 0.02 | 0 | BCell2 | LINC00926 | 0.04 |
| TNFRSF13B | 0 | 1.40 | 0.41 | 0.01 | 0 | BCell2 | TNFRSF13B | 0.02 |
| LY86 | 0 | 1.37 | 0.51 | 0.06 | 0 | BCell2 | LY86 | 0.08 |
| POU2AF11 | 0 | 1.36 | 0.48 | 0.05 | 0 | BCell2 | POU2AF1 | 0.07 |
| TLR10 | 0 | 1.32 | 0.42 | 0.01 | 0 | BCell2 | TLR10 | 0.03 |
| MARCH1 | 0 | 1.29 | 0.48 | 0.07 | 0 | BCell2 | MARCH1 | 0.09 |
| AIM2 | 0 | 1.28 | 0.42 | 0.05 | 0 | BCell2 | AIM2 | 0.06 |
| PARP15 | 0 | 1.04 | 0.41 | 0.07 | 0 | BCell2 | PARP15 | 0.08 |
| SYK | 8.35E-255 | 1.10 | 0.40 | 0.09 | 1.94E-250 | BCell2 | SYK | 0.10 |
| CD79A2 | 0 | 3.81 | 1.00 | 0.09 | 0 | BCell3 | CD79A | 0.09 |
| MS4A11 | 0 | 3.68 | 0.97 | 0.05 | 0 | BCell3 | MS4A1 | 0.06 |
| TCL1A | 0 | 3.54 | 0.89 | 0.01 | 0 | BCell3 | TCL1A | 0.01 |
| FCER2 | 0 | 2.89 | 0.81 | 0.01 | 0 | BCell3 | FCER2 | 0.02 |
| HVCN11 | 0 | 2.54 | 0.78 | 0.08 | 0 | BCell3 | HVCN1 | 0.08 |
| VPREB31 | 0 | 2.31 | 0.67 | 0.03 | 0 | BCell3 | VPREB3 | 0.03 |
| CD191 | 0 | 2.29 | 0.75 | 0.03 | 0 | BCell3 | CD19 | 0.04 |
| CD72 | 0 | 2.26 | 0.72 | 0.05 | 0 | BCell3 | CD72 | 0.05 |
| FAM129C1 | 0 | 2.11 | 0.66 | 0.02 | 0 | BCell3 | FAM129C | 0.02 |
| LINC009261 | 0 | 2.11 | 0.64 | 0.03 | 0 | BCell3 | LINC00926 | 0.04 |
| IGHD | 0 | 2.10 | 0.64 | 0.01 | 0 | BCell3 | IGHD | 0.01 |
| BANK11 | 0 | 2.04 | 0.75 | 0.04 | 0 | BCell3 | BANK1 | 0.04 |
| CD221 | 0 | 2.00 | 0.54 | 0.03 | 0 | BCell3 | CD22 | 0.03 |
| FCRLA1 | 0 | 1.55 | 0.46 | 0.03 | 0 | BCell3 | FCRLA | 0.03 |
| FCRL11 | 0 | 1.54 | 0.49 | 0.01 | 0 | BCell3 | FCRL1 | 0.02 |
| BLK1 | 0 | 1.47 | 0.53 | 0.03 | 0 | BCell3 | BLK | 0.03 |
| RP11-693J15.51 | 0 | 1.39 | 0.41 | 0.02 | 0 | BCell3 | RP11-693J15.5 | 0.02 |
| PAX51 | 0 | 1.39 | 0.44 | 0.01 | 0 | BCell3 | PAX5 | 0.02 |
| RP11-231C14.7 | 0 | 1.30 | 0.41 | 0.01 | 0 | BCell3 | RP11-231C14.7 | 0.02 |
| IGHM1 | 0 | 0.61 | 0.74 | 0.08 | 0 | BCell3 | IGHM | 0.09 |
| BACH2 | 7.27E-297 | 1.87 | 0.56 | 0.05 | 1.69E-292 | BCell3 | BACH2 | 0.06 |
| ADAM281 | 3.23E-252 | 1.83 | 0.61 | 0.07 | 7.50E-248 | BCell3 | ADAM28 | 0.08 |
| GAPT1 | 6.44E-247 | 1.35 | 0.45 | 0.04 | 1.50E-242 | BCell3 | GAPT | 0.04 |
| HLA-DOB1 | 6.16E-225 | 1.40 | 0.45 | 0.04 | 1.43E-220 | BCell3 | HLA-DOB | 0.05 |
| BTK1 | 3.19E-219 | 1.44 | 0.56 | 0.07 | 7.40E-215 | BCell3 | BTK | 0.07 |
| IRF81 | 6.93E-181 | 1.54 | 0.56 | 0.08 | 1.61E-176 | BCell3 | IRF8 | 0.09 |
| IGLL51 | 3.07E-172 | 1.25 | 0.40 | 0.04 | 7.14E-168 | BCell3 | IGLL5 | 0.05 |
| AFF31 | 1.90E-153 | 1.50 | 0.54 | 0.09 | 4.41E-149 | BCell3 | AFF3 | 0.09 |
| CIITA1 | 5.70E-150 | 1.32 | 0.47 | 0.07 | 1.32E-145 | BCell3 | CIITA | 0.07 |
| LY861 | 8.16E-145 | 1.25 | 0.48 | 0.07 | 1.89E-140 | BCell3 | LY86 | 0.08 |
| PHACTR1 | 2.40E-142 | 1.29 | 0.44 | 0.06 | 5.57E-138 | BCell3 | PHACTR1 | 0.07 |
| CTB-133G6.11 | 7.66E-139 | 1.19 | 0.40 | 0.05 | 1.78E-134 | BCell3 | CTB-133G6.1 | 0.06 |
| MARCH11 | 5.68E-126 | 1.26 | 0.49 | 0.08 | 1.32E-121 | BCell3 | MARCH11 | 0.09 |
| ARHGAP241 | 3.71E-124 | 1.28 | 0.44 | 0.07 | 8.61E-120 | BCell3 | ARHGAP24 | 0.08 |
| HLA-DOA1 | 1.57E-116 | 1.23 | 0.45 | 0.08 | 3.64E-112 | BCell3 | HLA-DOA | 0.08 |
| SYK1 | 2.74E-81 | 1.10 | 0.43 | 0.09 | 6.36E-77 | BCell3 | SYK | 0.10 |
| IRF82 | 0 | 3.72 | 0.98 | 0.08 | 0 | BCell4 | IRF8 | 0.09 |
| PLAC82 | 0 | 3.53 | 0.99 | 0.08 | 0 | BCell4 | PLAC8 | 0.08 |
| LILRA4 | 0 | 3.53 | 0.92 | 0.00 | 0 | BCell4 | LILRA4 | 0.01 |
| PLD4 | 0 | 3.32 | 0.93 | 0.03 | 0 | BCell4 | PLD4 | 0.04 |
| TCL1A1 | 0 | 3.11 | 0.56 | 0.01 | 0 | BCell4 | TCL1A | 0.01 |
| JCHAIN1 | 0 | 2.74 | 0.99 | 0.08 | 0 | BCell4 | JCHAIN | 0.08 |
| MPEG1 | 0 | 2.68 | 0.87 | 0.05 | 0 | BCell4 | MPEG1 | 0.05 |
| BCL11A2 | 0 | 2.46 | 0.90 | 0.08 | 0 | BCell4 | BCL11A | 0.08 |
| SCT | 0 | 2.43 | 0.73 | 0.02 | 0 | BCell4 | SCT | 0.03 |
| C1orf1861 | 0 | 2.39 | 0.88 | 0.05 | 0 | BCell4 | C1orf186 | 0.05 |
| IL3RA | 0 | 2.35 | 0.81 | 0.03 | 0 | BCell4 | IL3RA | 0.03 |
| SMPD3 | 0 | 2.32 | 0.80 | 0.01 | 0 | BCell4 | SMPD3 | 0.02 |
| DNASE1L3 | 0 | 2.21 | 0.78 | 0.01 | 0 | BCell4 | DNASE1L3 | 0.01 |
| LINC00996 | 0 | 2.18 | 0.67 | 0.02 | 0 | BCell4 | LINC00996 | 0.02 |
| SPIB2 | 0 | 2.18 | 0.76 | 0.03 | 0 | BCell4 | SPIB | 0.03 |
| LRRC26 | 0 | 2.06 | 0.77 | 0.05 | 0 | BCell4 | LRRC26 | 0.05 |
| FAM129C2 | 0 | 1.95 | 0.67 | 0.02 | 0 | BCell4 | FAM129C | 0.02 |
| PTCRA | 0 | 1.91 | 0.65 | 0.00 | 0 | BCell4 | PTCRA | 0.00 |
| CLEC4C | 0 | 1.89 | 0.69 | 0.00 | 0 | BCell4 | CLEC4C | 0.00 |
| GAPT2 | 0 | 1.80 | 0.76 | 0.04 | 0 | BCell4 | GAPT | 0.04 |
| LAMP5 | 0 | 1.73 | 0.65 | 0.03 | 0 | BCell4 | LAMP5 | 0.03 |
| ZFAT | 0 | 1.71 | 0.67 | 0.03 | 0 | BCell4 | ZFAT | 0.04 |
| SMIM5 | 0 | 1.69 | 0.65 | 0.01 | 0 | BCell4 | SMIM5 | 0.01 |
| SCAMP5 | 0 | 1.52 | 0.59 | 0.03 | 0 | BCell4 | SCAMP5 | 0.03 |
| WDFY4 | 0 | 1.36 | 0.59 | 0.03 | 0 | BCell4 | WDFY4 | 0.03 |
| PACSIN1 | 0 | 1.28 | 0.55 | 0.01 | 0 | BCell4 | PACSIN1 | 0.01 |
| P2RY14 | 0 | 1.21 | 0.55 | 0.02 | 0 | BCell4 | P2RY14 | 0.02 |
| MYCL | 0 | 1.17 | 0.47 | 0.02 | 0 | BCell4 | MYCL | 0.02 |
| EPHB1 | 0 | 1.14 | 0.43 | 0.02 | 0 | BCell4 | EPHB1 | 0.02 |
| RP11-117D22.2 | 0 | 1.04 | 0.43 | 0.01 | 0 | BCell4 | RP11-117D22.2 | 0.01 |
| TLR7 | 7.37E-298 | 1.16 | 0.48 | 0.02 | 1.71E-293 | BCell4 | TLR7 | 0.03 |
| MAP1A | 2.01E-289 | 1.89 | 0.76 | 0.06 | 4.67E-285 | BCell4 | MAP1A | 0.07 |
| LILRB4 | 3.77E-274 | 1.81 | 0.80 | 0.07 | 8.74E-270 | BCell4 | LILRB4 | 0.07 |
| RNASE61 | 9.06E-273 | 2.09 | 0.87 | 0.09 | 2.10E-268 | BCell4 | RNASE6 | 0.09 |
| CSF2RB | 5.67E-267 | 1.55 | 0.65 | 0.05 | 1.32E-262 | BCell4 | CSF2RB | 0.05 |
| CBFA2T3 | 1.15E-255 | 1.34 | 0.49 | 0.03 | 2.66E-251 | BCell4 | CBFA2T3 | 0.03 |
| KIAA0226L1 | 9.93E-251 | 1.32 | 0.56 | 0.04 | 2.30E-246 | BCell4 | KIAA0226L | 0.04 |
| MYBL2 | 7.65E-233 | 1.46 | 0.48 | 0.03 | 1.78E-228 | BCell4 | MYBL2 | 0.03 |
| PTPRS | 8.83E-216 | 2.05 | 0.78 | 0.09 | 2.05E-211 | BCell4 | PTPRS | 0.10 |
| SUSD1 | 5.71E-213 | 1.20 | 0.43 | 0.03 | 1.33E-208 | BCell4 | SUSD1 | 0.03 |
| NAPSA1 | 5.74E-208 | 1.13 | 0.42 | 0.03 | 1.33E-203 | BCell4 | NAPSA | 0.03 |
| IRF41 | 2.11E-204 | 1.46 | 0.57 | 0.05 | 4.90E-200 | BCell4 | IRF4 | 0.05 |
| SLC15A4 | 1.38E-195 | 1.69 | 0.67 | 0.07 | 3.20E-191 | BCell4 | SLC15A4 | 0.08 |
| MS4A6A | 1.40E-195 | 1.96 | 0.77 | 0.09 | 3.24E-191 | BCell4 | MS4A6A | 0.09 |
| DUSP5 | 3.98E-177 | 1.56 | 0.61 | 0.06 | 9.24E-173 | BCell4 | DUSP5 | 0.07 |
| CARD11 | 4.05E-167 | 1.15 | 0.56 | 0.05 | 9.41E-163 | BCell4 | CARD11 | 0.06 |
| CXorf21 | 4.92E-162 | 1.21 | 0.52 | 0.05 | 1.14E-157 | BCell4 | CXorf21 | 0.05 |
| CYBB2 | 9.43E-160 | 1.31 | 0.74 | 0.09 | 2.19E-155 | BCell4 | CYBB | 0.10 |
| TNFRSF21 | 3.23E-147 | 1.31 | 0.58 | 0.07 | 7.49E-143 | BCell4 | TNFRSF21 | 0.07 |
| P2RY6 | 4.81E-144 | 1.13 | 0.44 | 0.04 | 1.12E-139 | BCell4 | P2RY6 | 0.04 |
| ABHD15 | 1.12E-143 | 1.00 | 0.46 | 0.04 | 2.59E-139 | BCell4 | ABHD15 | 0.04 |
| MCOLN2 | 1.67E-137 | 0.95 | 0.50 | 0.05 | 3.88E-133 | BCell4 | MCOLN2 | 0.05 |
| SYK2 | 5.94E-134 | 1.34 | 0.66 | 0.09 | 1.38E-129 | BCell4 | SYK | 0.10 |
| PHACTR11 | 1.46E-116 | 1.05 | 0.52 | 0.07 | 3.40E-112 | BCell4 | PHACTR1 | 0.07 |
| CD36 | 2.48E-116 | 0.78 | 0.46 | 0.05 | 5.75E-112 | BCell4 | CD36 | 0.05 |
| SLAMF71 | 1.12E-108 | 1.05 | 0.56 | 0.08 | 2.60E-104 | BCell4 | SLAMF7 | 0.08 |
| ZDHHC17 | 4.84E-101 | 1.11 | 0.57 | 0.09 | 1.12E-96 | BCell4 | ZDHHC17 | 0.09 |
| CHAF1A | 1.27E-100 | 0.93 | 0.42 | 0.05 | 2.96E-96 | BCell4 | CHAF1A | 0.05 |
| RASSF2 | 1.20E-96 | 1.13 | 0.56 | 0.09 | 2.78E-92 | BCell4 | RASSF2 | 0.09 |
| OPN3 | 2.28E-96 | 1.14 | 0.53 | 0.08 | 5.30E-92 | BCell4 | OPN3 | 0.09 |
| GNA15 | 3.89E-96 | 0.94 | 0.52 | 0.08 | 9.03E-92 | BCell4 | GNA15 | 0.08 |
| TMEM8B | 7.50E-95 | 0.99 | 0.45 | 0.06 | 1.74E-90 | BCell4 | TMEM8B | 0.06 |
| FGD22 | 9.70E-81 | 0.80 | 0.41 | 0.06 | 2.25E-76 | BCell4 | FGD2 | 0.06 |
| BCL7A1 | 3.40E-80 | 0.94 | 0.44 | 0.07 | 7.89E-76 | BCell4 | BCL7A | 0.07 |
| CDYL | 8.74E-79 | 0.99 | 0.47 | 0.08 | 2.03E-74 | BCell4 | CDYL | 0.08 |
| SIDT1 | 1.57E-76 | 0.85 | 0.46 | 0.07 | 3.63E-72 | BCell4 | SIDT1 | 0.07 |
| HVCN12 | 2.02E-72 | 0.77 | 0.47 | 0.08 | 4.69E-68 | BCell4 | HVCN1 | 0.08 |
| CYSLTR1 | 2.44E-68 | 0.74 | 0.44 | 0.07 | 5.67E-64 | BCell4 | CYSLTR1 | 0.08 |
| ARID3A | 5.17E-67 | 0.95 | 0.43 | 0.08 | 1.20E-62 | BCell4 | ARID3A | 0.08 |
| GNG73 | 6.93E-66 | 0.92 | 0.47 | 0.09 | 1.61E-61 | BCell4 | GNG7 | 0.10 |
| MARCH12 | 1.21E-65 | 0.88 | 0.47 | 0.08 | 2.80E-61 | BCell4 | MARCH12 | 0.09 |
| RUBCN | 3.88E-65 | 0.96 | 0.46 | 0.09 | 9.01E-61 | BCell4 | RUBCN | 0.09 |
| PIK3AP12 | 7.41E-63 | 0.88 | 0.45 | 0.08 | 1.72E-58 | BCell4 | PIK3AP1 | 0.08 |
| CIITA2 | 4.38E-62 | 0.79 | 0.41 | 0.07 | 1.02E-57 | BCell4 | CIITA | 0.07 |
| TATDN3 | 3.28E-55 | 0.97 | 0.44 | 0.09 | 7.62E-51 | BCell4 | TATDN3 | 0.09 |
| COBLL11 | 1.98E-53 | 0.73 | 0.43 | 0.09 | 4.60E-49 | BCell4 | COBLL1 | 0.09 |
| ADAM191 | 7.57E-53 | 0.70 | 0.42 | 0.08 | 1.76E-48 | BCell4 | ADAM19 | 0.08 |
| ST14 | 1.28E-49 | 0.68 | 0.42 | 0.09 | 2.96E-45 | BCell4 | ST14 | 0.09 |
| ST3GAL2 | 1.40E-46 | 0.76 | 0.41 | 0.09 | 3.25E-42 | BCell4 | ST3GAL2 | 0.10 |
| CD300A | 6.58E-44 | 0.68 | 0.40 | 0.09 | 1.53E-39 | BCell4 | CD300A | 0.09 |
| FCRL51 | 3.21E-190 | 1.02 | 0.49 | 0.03 | 7.45E-186 | BCell5 | FCRL5 | 0.04 |
| CD79A3 | 7.62E-180 | 1.72 | 0.80 | 0.09 | 1.77E-175 | BCell5 | CD79A | 0.09 |
| IGLL52 | 1.16E-178 | 2.91 | 0.53 | 0.04 | 2.69E-174 | BCell5 | IGLL5 | 0.05 |
| POU2AF13 | 1.04E-148 | 1.12 | 0.60 | 0.06 | 2.42E-144 | BCell5 | POU2AF1 | 0.07 |
| TXNDC51 | 1.82E-122 | 1.40 | 0.43 | 0.04 | 4.23E-118 | BCell5 | TXNDC5 | 0.04 |
| IGKV1-121 | 1.73E-113 | 2.37 | 0.43 | 0.04 | 4.02E-109 | BCell5 | IGKV1-12 | 0.05 |
| IGHM2 | 1.39E-109 | 5.28 | 0.60 | 0.09 | 3.23E-105 | BCell5 | IGHM | 0.09 |
| JCHAIN2 | 2.32E-103 | 3.85 | 0.56 | 0.08 | 5.38E-99 | BCell5 | JCHAIN | 0.08 |
| CPNE52 | 1.83E-89 | 0.63 | 0.41 | 0.05 | 4.24E-85 | BCell5 | CPNE5 | 0.05 |
| IGLV3-11 | 2.07E-85 | 2.43 | 0.45 | 0.06 | 4.81E-81 | BCell5 | IGLV3-1 | 0.06 |
| IGHG41 | 3.15E-70 | 2.58 | 0.42 | 0.06 | 7.32E-66 | BCell5 | IGHG4 | 0.06 |
| IGHG21 | 6.86E-70 | 2.30 | 0.43 | 0.06 | 1.59E-65 | BCell5 | IGHG2 | 0.07 |
| LAX11 | 1.35E-56 | 0.50 | 0.40 | 0.07 | 3.14E-52 | BCell5 | LAX1 | 0.07 |
| EAF22 | 1.11E-54 | 0.70 | 0.41 | 0.07 | 2.57E-50 | BCell5 | EAF2 | 0.08 |
| CD382 | 1.19E-52 | 0.78 | 0.49 | 0.10 | 2.77E-48 | BCell5 | CD38 | 0.10 |
| SLAMF72 | 1.75E-51 | 0.67 | 0.43 | 0.08 | 4.07E-47 | BCell5 | SLAMF7 | 0.08 |
| MEI11 | 2.26E-40 | 0.42 | 0.40 | 0.08 | 5.24E-36 | BCell5 | MEI1 | 0.09 |
| IGKV1-172 | 0 | 9.58 | 0.91 | 0.05 | 0 | BCell6 | IGKV1-17 | 0.05 |
| IGHV3-66 | 0 | 8.33 | 0.54 | 0.01 | 0 | BCell6 | IGHV3-66 | 0.01 |
| IGHV3-53 | 0 | 8.09 | 0.45 | 0.01 | 0 | BCell6 | IGHV3-53 | 0.01 |
| IGHV3-211 | 0 | 7.81 | 0.98 | 0.04 | 0 | BCell6 | IGHV3-21 | 0.04 |
| IGKV1-122 | 0 | 7.51 | 0.87 | 0.04 | 0 | BCell6 | IGKV1-12 | 0.05 |
| IGHV3-20 | 0 | 5.26 | 0.43 | 0.01 | 0 | BCell6 | IGHV3-20 | 0.01 |
| IGHG22 | 0 | 4.62 | 0.94 | 0.06 | 0 | BCell6 | IGHG2 | 0.07 |
| IGKV1D-17 | 0 | 4.44 | 0.82 | 0.00 | 0 | BCell6 | IGKV1D-17 | 0.01 |
| IGKV1D-43 | 0 | 4.34 | 0.82 | 0.00 | 0 | BCell6 | IGKV1D-43 | 0.01 |
| IGHV3-75 | 0 | 4.15 | 0.83 | 0.02 | 0 | BCell6 | IGHV3-7 | 0.03 |
| IGKV1-9 | 0 | 3.98 | 0.75 | 0.03 | 0 | BCell6 | IGKV1-9 | 0.03 |
| IGKV1-16 | 0 | 3.78 | 0.54 | 0.01 | 0 | BCell6 | IGKV1-16 | 0.01 |
| IGKV1D-12 | 0 | 3.32 | 0.70 | 0.00 | 0 | BCell6 | IGKV1D-12 | 0.01 |
| IGHG42 | 0 | 3.20 | 0.97 | 0.06 | 0 | BCell6 | IGHG4 | 0.06 |
| IGKV1-6 | 0 | 3.04 | 0.81 | 0.02 | 0 | BCell6 | IGKV1-6 | 0.03 |
| IGKV1OR22-5 | 0 | 2.93 | 0.80 | 0.00 | 0 | BCell6 | IGKV1OR22-5 | 0.00 |
| IGHGP1 | 0 | 1.89 | 0.82 | 0.02 | 0 | BCell6 | IGHGP | 0.02 |
| IGHV3-11 | 0 | 1.82 | 0.87 | 0.02 | 0 | BCell6 | IGHV3-11 | 0.03 |
| IGHV3-72 | 0 | 1.62 | 0.89 | 0.01 | 0 | BCell6 | IGHV3-72 | 0.01 |
| TXNDC52 | 0 | 1.59 | 0.80 | 0.04 | 0 | BCell6 | TXNDC5 | 0.04 |
| IGLL53 | 0 | 1.59 | 0.98 | 0.04 | 0 | BCell6 | IGLL5 | 0.05 |
| IGHV3-64 | 0 | 1.42 | 0.64 | 0.01 | 0 | BCell6 | IGHV3-64 | 0.01 |
| IGHV3OR16-10 | 0 | 1.28 | 0.40 | 0.00 | 0 | BCell6 | IGHV3OR16-10 | 0.00 |
| IGKV1-37 | 0 | 1.28 | 0.68 | 0.00 | 0 | BCell6 | IGKV1-37 | 0.00 |
| IGHV3-13 | 0 | 0.60 | 0.60 | 0.01 | 0 | BCell6 | IGHV3-13 | 0.01 |
| IGKV1D-16 | 0 | 0.60 | 0.76 | 0.01 | 0 | BCell6 | IGKV1D-16 | 0.02 |
| IGHV3-74 | 3.66E-248 | 5.15 | 0.42 | 0.02 | 8.51E-244 | BCell6 | IGHV3-74 | 0.02 |
| IGKV1-52 | 8.09E-246 | 3.07 | 0.83 | 0.06 | 1.88E-241 | BCell6 | IGKV1-5 | 0.07 |
| FCRL52 | 1.21E-245 | 0.79 | 0.62 | 0.03 | 2.81E-241 | BCell6 | FCRL5 | 0.04 |
| RP11-290F5.12 | 6.22E-241 | 0.73 | 0.48 | 0.02 | 1.44E-236 | BCell6 | RP11-290F5.1 | 0.02 |
| RP11-16E12.22 | 3.16E-227 | 0.58 | 0.48 | 0.02 | 7.33E-223 | BCell6 | RP11-16E12.2 | 0.02 |
| IGLV3-12 | 4.70E-195 | 0.55 | 0.75 | 0.06 | 1.09E-190 | BCell6 | IGLV3-1 | 0.06 |
| POU2AF14 | 1.53E-192 | 1.16 | 0.76 | 0.06 | 3.55E-188 | BCell6 | POU2AF1 | 0.07 |
| CD79A4 | 3.59E-183 | 1.09 | 0.92 | 0.09 | 8.34E-179 | BCell6 | CD79A | 0.09 |
| TNFRSF172 | 8.38E-175 | 0.64 | 0.48 | 0.03 | 1.95E-170 | BCell6 | TNFRSF17 | 0.03 |
| JSRP12 | 3.67E-172 | 0.68 | 0.44 | 0.02 | 8.52E-168 | BCell6 | JSRP1 | 0.03 |
| CPNE53 | 2.63E-165 | 0.63 | 0.61 | 0.05 | 6.12E-161 | BCell6 | CPNE5 | 0.05 |
| SPAG42 | 5.76E-154 | 0.76 | 0.58 | 0.05 | 1.34E-149 | BCell6 | SPAG4 | 0.05 |
| CD383 | 6.75E-150 | 1.13 | 0.85 | 0.10 | 1.57E-145 | BCell6 | CD38 | 0.10 |
| JCHAIN3 | 1.21E-141 | 1.56 | 0.74 | 0.08 | 2.81E-137 | BCell6 | JCHAIN | 0.08 |
| P2RX13 | 7.73E-139 | 0.51 | 0.43 | 0.03 | 1.79E-134 | BCell6 | P2RX1 | 0.03 |
| PTCH2 | 1.34E-116 | 0.67 | 0.44 | 0.04 | 3.11E-112 | BCell6 | PTCH2 | 0.04 |
| LAX12 | 3.01E-90 | 0.61 | 0.55 | 0.07 | 6.98E-86 | BCell6 | LAX1 | 0.07 |
| IFNG-AS12 | 1.72E-89 | 0.42 | 0.41 | 0.04 | 3.99E-85 | BCell6 | IFNG-AS1 | 0.04 |
| EAF23 | 1.42E-72 | 0.54 | 0.53 | 0.07 | 3.31E-68 | BCell6 | EAF2 | 0.08 |
| SLAMF73 | 6.37E-72 | 0.40 | 0.56 | 0.08 | 1.48E-67 | BCell6 | SLAMF7 | 0.08 |
| IGHM3 | 9.78E-67 | 1.70 | 0.56 | 0.09 | 2.27E-62 | BCell6 | IGHM | 0.09 |
| IRF43 | 1.17E-65 | 0.52 | 0.40 | 0.05 | 2.72E-61 | BCell6 | IRF4 | 0.05 |
| RHBDD1 | 1.55E-48 | 0.63 | 0.40 | 0.06 | 3.61E-44 | BCell6 | RHBDD1 | 0.07 |
| RNU122 | 3.73E-47 | 1.01 | 0.47 | 0.09 | 8.66E-43 | BCell6 | RNU12 | 0.09 |
| RAB303 | 1.89E-43 | 0.39 | 0.45 | 0.08 | 4.40E-39 | BCell6 | RAB30 | 0.08 |
| EIF2AK32 | 1.10E-33 | 0.36 | 0.40 | 0.08 | 2.54E-29 | BCell6 | EIF2AK3 | 0.09 |
| FCRL53 | 1.01E-93 | 1.07 | 0.66 | 0.04 | 2.34E-89 | BCell7 | FCRL5 | 0.04 |
| KCNN3 | 1.01E-88 | 0.65 | 0.47 | 0.02 | 2.34E-84 | BCell7 | KCNN3 | 0.02 |
| TNFRSF173 | 1.18E-72 | 1.02 | 0.53 | 0.03 | 2.73E-68 | BCell7 | TNFRSF17 | 0.03 |
| RP11-16E12.23 | 6.70E-66 | 0.67 | 0.45 | 0.02 | 1.55E-61 | BCell7 | RP11-16E12.2 | 0.02 |
| CD79A5 | 2.97E-65 | 2.37 | 0.90 | 0.09 | 6.91E-61 | BCell7 | CD79A | 0.09 |
| JCHAIN4 | 1.69E-63 | 4.10 | 0.82 | 0.08 | 3.92E-59 | BCell7 | JCHAIN | 0.08 |
| IGHG23 | 1.59E-53 | 2.95 | 0.68 | 0.07 | 3.69E-49 | BCell7 | IGHG2 | 0.07 |
| IGHG43 | 6.81E-37 | 6.06 | 0.58 | 0.06 | 1.58E-32 | BCell7 | IGHG4 | 0.06 |
| CPNE54 | 2.23E-29 | 0.72 | 0.45 | 0.05 | 5.17E-25 | BCell7 | CPNE5 | 0.05 |
| POU2AF15 | 1.07E-28 | 0.67 | 0.53 | 0.07 | 2.48E-24 | BCell7 | POU2AF1 | 0.07 |
| IGLC32 | 7.93E-27 | 8.05 | 0.50 | 0.07 | 1.84E-22 | BCell7 | IGLC3 | 0.07 |
| SLAMF74 | 6.24E-22 | 0.49 | 0.53 | 0.08 | 1.45E-17 | BCell7 | SLAMF7 | 0.08 |
| EAF24 | 1.51E-17 | 0.46 | 0.45 | 0.08 | 3.51E-13 | BCell7 | EAF2 | 0.08 |
| MEI12 | 6.45E-17 | 0.63 | 0.47 | 0.09 | 1.50E-12 | BCell7 | MEI1 | 0.09 |
| COL11A1 | 0 | 3.78 | 0.65 | 0.01 | 0 | Chondrocytes | COL11A1 | 0.08 |
| COL10A1 | 0 | 3.07 | 0.61 | 0.01 | 0 | Chondrocytes | COL10A1 | 0.07 |
| ASPN | 0 | 2.75 | 0.57 | 0.02 | 0 | Chondrocytes | ASPN | 0.08 |
| COMP | 0 | 2.38 | 0.42 | 0.01 | 0 | Chondrocytes | COMP | 0.05 |
| SULF1 | 0 | 2.27 | 0.57 | 0.03 | 0 | Chondrocytes | SULF1 | 0.09 |
| ITGA11 | 0 | 2.15 | 0.59 | 0.01 | 0 | Chondrocytes | ITGA11 | 0.07 |
| LRRC15 | 0 | 2.12 | 0.58 | 0.01 | 0 | Chondrocytes | LRRC15 | 0.07 |
| FNDC1 | 0 | 2.04 | 0.55 | 0.04 | 0 | Chondrocytes | FNDC1 | 0.09 |
| INHBA | 0 | 1.83 | 0.55 | 0.04 | 0 | Chondrocytes | INHBA | 0.09 |
| LOXL1 | 0 | 1.59 | 0.59 | 0.04 | 0 | Chondrocytes | LOXL1 | 0.10 |
| HTRA3 | 0 | 1.59 | 0.47 | 0.02 | 0 | Chondrocytes | HTRA3 | 0.07 |
| SERPINE2 | 0 | 1.58 | 0.46 | 0.05 | 0 | Chondrocytes | SERPINE2 | 0.10 |
| FAP | 0 | 1.57 | 0.58 | 0.03 | 0 | Chondrocytes | FAP | 0.08 |
| ADAMTS2 | 0 | 1.55 | 0.62 | 0.02 | 0 | Chondrocytes | ADAMTS2 | 0.09 |
| ITGBL1 | 0 | 1.54 | 0.49 | 0.01 | 0 | Chondrocytes | ITGBL1 | 0.06 |
| MEG3 | 0 | 1.52 | 0.55 | 0.03 | 0 | Chondrocytes | MEG3 | 0.08 |
| COL8A2 | 0 | 1.41 | 0.51 | 0.02 | 0 | Chondrocytes | COL8A2 | 0.07 |
| EMILIN1 | 0 | 1.32 | 0.59 | 0.04 | 0 | Chondrocytes | EMILIN1 | 0.10 |
| EDIL3 | 0 | 1.30 | 0.50 | 0.02 | 0 | Chondrocytes | EDIL3 | 0.07 |
| CRISPLD2 | 0 | 1.28 | 0.52 | 0.04 | 0 | Chondrocytes | CRISPLD2 | 0.09 |
| ELN | 0 | 1.28 | 0.42 | 0.03 | 0 | Chondrocytes | ELN | 0.07 |
| SMOC2 | 0 | 1.27 | 0.48 | 0.05 | 0 | Chondrocytes | SMOC2 | 0.10 |
| OLFML2B | 0 | 1.27 | 0.48 | 0.05 | 0 | Chondrocytes | OLFML2B | 0.10 |
| ANGPTL2 | 0 | 1.24 | 0.53 | 0.04 | 0 | Chondrocytes | ANGPTL2 | 0.09 |
| FMOD | 0 | 1.20 | 0.56 | 0.03 | 0 | Chondrocytes | FMOD | 0.09 |
| CYP1B1 | 0 | 1.18 | 0.43 | 0.04 | 0 | Chondrocytes | CYP1B1 | 0.08 |
| PODN | 0 | 1.14 | 0.50 | 0.03 | 0 | Chondrocytes | PODN | 0.08 |
| DPT | 0 | 1.12 | 0.40 | 0.03 | 0 | Chondrocytes | DPT | 0.07 |
| SPON1 | 0 | 1.12 | 0.48 | 0.02 | 0 | Chondrocytes | SPON1 | 0.07 |
| FIBIN | 0 | 1.12 | 0.47 | 0.02 | 0 | Chondrocytes | FIBIN | 0.07 |
| DKK3 | 0 | 1.09 | 0.51 | 0.05 | 0 | Chondrocytes | DKK3 | 0.09 |
| SPOCK1 | 0 | 1.09 | 0.49 | 0.01 | 0 | Chondrocytes | SPOCK1 | 0.06 |
| HMCN1 | 0 | 1.07 | 0.45 | 0.02 | 0 | Chondrocytes | HMCN1 | 0.07 |
| C1QTNF6 | 0 | 1.06 | 0.51 | 0.04 | 0 | Chondrocytes | C1QTNF6 | 0.09 |
| GLT8D2 | 0 | 1.04 | 0.50 | 0.03 | 0 | Chondrocytes | GLT8D2 | 0.08 |
| PDPN | 0 | 1.04 | 0.44 | 0.02 | 0 | Chondrocytes | PDPN | 0.07 |
| NTM | 0 | 1.03 | 0.41 | 0.01 | 0 | Chondrocytes | NTM | 0.05 |
| CREB3L1 | 0 | 1.03 | 0.49 | 0.03 | 0 | Chondrocytes | CREB3L1 | 0.08 |
| SCARF2 | 0 | 1.02 | 0.46 | 0.02 | 0 | Chondrocytes | SCARF2 | 0.06 |
| GAS1 | 0 | 1.00 | 0.45 | 0.03 | 0 | Chondrocytes | GAS1 | 0.08 |
| SLIT3 | 0 | 0.99 | 0.46 | 0.04 | 0 | Chondrocytes | SLIT3 | 0.08 |
| GPX8 | 0 | 0.96 | 0.49 | 0.04 | 0 | Chondrocytes | GPX8 | 0.09 |
| FRMD6 | 0 | 0.96 | 0.50 | 0.05 | 0 | Chondrocytes | FRMD6 | 0.09 |
| ADAMTS12 | 0 | 0.91 | 0.45 | 0.02 | 0 | Chondrocytes | ADAMTS12 | 0.07 |
| BMP1 | 0 | 0.88 | 0.45 | 0.04 | 0 | Chondrocytes | BMP1 | 0.09 |
| PCDH7 | 0 | 0.87 | 0.42 | 0.01 | 0 | Chondrocytes | PCDH7 | 0.05 |
| P3H3 | 0 | 0.85 | 0.48 | 0.03 | 0 | Chondrocytes | P3H3 | 0.08 |
| PDGFRA | 0 | 0.84 | 0.44 | 0.06 | 0 | Chondrocytes | PDGFRA | 0.10 |
| FZD1 | 0 | 0.84 | 0.45 | 0.06 | 0 | Chondrocytes | FZD1 | 0.10 |
| IGFBP6 | 0 | 0.83 | 0.42 | 0.05 | 0 | Chondrocytes | IGFBP6 | 0.09 |
| PTGFRN | 0 | 0.81 | 0.45 | 0.05 | 0 | Chondrocytes | PTGFRN | 0.10 |
| MFAP4 | 0 | 0.81 | 0.43 | 0.04 | 0 | Chondrocytes | MFAP4 | 0.08 |
| PODNL1 | 0 | 0.80 | 0.41 | 0.01 | 0 | Chondrocytes | PODNL1 | 0.06 |
| MYH10 | 0 | 0.79 | 0.44 | 0.05 | 0 | Chondrocytes | MYH10 | 0.09 |
| PLAC9 | 0 | 0.79 | 0.48 | 0.05 | 0 | Chondrocytes | PLAC9 | 0.10 |
| KIF26B | 0 | 0.78 | 0.41 | 0.02 | 0 | Chondrocytes | KIF26B | 0.06 |
| CFH | 0 | 0.78 | 0.42 | 0.06 | 0 | Chondrocytes | CFH | 0.10 |
| LMO7 | 0 | 0.76 | 0.41 | 0.05 | 0 | Chondrocytes | LMO7 | 0.09 |
| PRICKLE1 | 0 | 0.74 | 0.43 | 0.06 | 0 | Chondrocytes | PRICKLE1 | 0.10 |
| TEAD1 | 0 | 0.74 | 0.43 | 0.05 | 0 | Chondrocytes | TEAD1 | 0.09 |
| CLMP | 0 | 0.69 | 0.41 | 0.03 | 0 | Chondrocytes | CLMP | 0.07 |
| SNHG18 | 0 | 0.69 | 0.43 | 0.04 | 0 | Chondrocytes | SNHG18 | 0.08 |
| AXL | 0 | 0.67 | 0.41 | 0.05 | 0 | Chondrocytes | AXL | 0.09 |
| AHNAK2 | 0 | 0.64 | 0.40 | 0.06 | 0 | Chondrocytes | AHNAK2 | 0.10 |
| GAS7 | 0 | 0.63 | 0.42 | 0.05 | 0 | Chondrocytes | GAS7 | 0.09 |
| TSKU | 0 | 0.62 | 0.43 | 0.06 | 0 | Chondrocytes | TSKU | 0.10 |
| PTN | 0 | 0.61 | 0.42 | 0.03 | 0 | Chondrocytes | PTN | 0.07 |
| CDK2AP1 | 0 | 0.53 | 0.41 | 0.06 | 0 | Chondrocytes | CDK2AP1 | 0.10 |
| TPSAB1 | 0 | 6.72 | 0.98 | 0.01 | 0 | CMP | TPSAB1 | 0.01 |
| TPSB2 | 0 | 6.13 | 0.97 | 0.00 | 0 | CMP | TPSB2 | 0.01 |
| CPA3 | 0 | 5.49 | 0.95 | 0.00 | 0 | CMP | CPA3 | 0.01 |
| MS4A2 | 0 | 4.76 | 0.98 | 0.00 | 0 | CMP | MS4A2 | 0.01 |
| TPSD1 | 0 | 4.28 | 0.84 | 0.00 | 0 | CMP | TPSD1 | 0.01 |
| HPGD | 0 | 4.10 | 0.87 | 0.03 | 0 | CMP | HPGD | 0.03 |
| GATA2 | 0 | 3.94 | 0.97 | 0.02 | 0 | CMP | GATA2 | 0.02 |
| HPGDS | 0 | 3.83 | 0.96 | 0.01 | 0 | CMP | HPGDS | 0.02 |
| VWA5A | 0 | 3.59 | 0.94 | 0.05 | 0 | CMP | VWA5A | 0.06 |
| HDC | 0 | 3.50 | 0.89 | 0.01 | 0 | CMP | HDC | 0.02 |
| SLC18A2 | 0 | 3.46 | 0.88 | 0.01 | 0 | CMP | SLC18A2 | 0.02 |
| C1orf1863 | 0 | 3.20 | 0.92 | 0.04 | 0 | CMP | C1orf186 | 0.05 |
| KIT | 0 | 3.13 | 0.87 | 0.02 | 0 | CMP | KIT | 0.03 |
| LTC4S | 0 | 3.03 | 0.90 | 0.07 | 0 | CMP | LTC4S | 0.08 |
| RGS13 | 0 | 2.77 | 0.83 | 0.01 | 0 | CMP | RGS13 | 0.01 |
| ALOX52 | 0 | 2.65 | 0.84 | 0.09 | 0 | CMP | ALOX5 | 0.09 |
| HS3ST1 | 0 | 2.63 | 0.76 | 0.06 | 0 | CMP | HS3ST1 | 0.06 |
| PTGS1 | 0 | 2.44 | 0.83 | 0.04 | 0 | CMP | PTGS1 | 0.05 |
| RP11-354E11.2 | 0 | 2.38 | 0.74 | 0.00 | 0 | CMP | RP11-354E11.2 | 0.01 |
| RAB27B | 0 | 2.31 | 0.76 | 0.05 | 0 | CMP | RAB27B | 0.06 |
| IL1RL1 | 0 | 2.28 | 0.75 | 0.00 | 0 | CMP | IL1RL1 | 0.01 |
| MAOB | 0 | 2.17 | 0.75 | 0.06 | 0 | CMP | MAOB | 0.06 |
| SLC45A3 | 0 | 2.10 | 0.71 | 0.01 | 0 | CMP | SLC45A3 | 0.02 |
| BTK3 | 0 | 2.01 | 0.73 | 0.07 | 0 | CMP | BTK | 0.07 |
| ADRB2 | 0 | 1.95 | 0.69 | 0.05 | 0 | CMP | ADRB2 | 0.05 |
| CNRIP1 | 0 | 1.91 | 0.70 | 0.07 | 0 | CMP | CNRIP1 | 0.08 |
| GMPR | 0 | 1.76 | 0.62 | 0.04 | 0 | CMP | GMPR | 0.04 |
| NTRK1 | 0 | 1.68 | 0.58 | 0.01 | 0 | CMP | NTRK1 | 0.01 |
| CALB2 | 0 | 1.63 | 0.59 | 0.05 | 0 | CMP | CALB2 | 0.05 |
| SIGLEC6 | 0 | 1.59 | 0.57 | 0.00 | 0 | CMP | SIGLEC6 | 0.01 |
| P2RX15 | 0 | 1.55 | 0.54 | 0.03 | 0 | CMP | P2RX1 | 0.03 |
| CD33 | 0 | 1.45 | 0.53 | 0.03 | 0 | CMP | CD33 | 0.04 |
| TMEM233 | 0 | 1.43 | 0.48 | 0.01 | 0 | CMP | TMEM233 | 0.01 |
| FCER1A | 0 | 1.34 | 0.46 | 0.01 | 0 | CMP | FCER1A | 0.02 |
| RASGRP4 | 0 | 1.34 | 0.49 | 0.01 | 0 | CMP | RASGRP4 | 0.02 |
| PIK3R6 | 0 | 1.21 | 0.45 | 0.02 | 0 | CMP | PIK3R6 | 0.02 |
| GCSAML | 0 | 1.17 | 0.42 | 0.00 | 0 | CMP | GCSAML | 0.00 |
| CTTNBP2 | 0 | 1.15 | 0.40 | 0.02 | 0 | CMP | CTTNBP2 | 0.02 |
| SVOPL | 0 | 1.04 | 0.41 | 0.02 | 0 | CMP | SVOPL | 0.02 |
| TESC | 1.86E-283 | 1.64 | 0.62 | 0.06 | 4.33E-279 | CMP | TESC | 0.06 |
| IL18 | 1.25E-269 | 1.38 | 0.60 | 0.06 | 2.91E-265 | CMP | IL18 | 0.06 |
| SDPR | 3.65E-252 | 1.17 | 0.42 | 0.03 | 8.48E-248 | CMP | SDPR | 0.03 |
| NDST2 | 3.22E-250 | 1.29 | 0.45 | 0.04 | 7.48E-246 | CMP | NDST2 | 0.04 |
| STX3 | 1.62E-249 | 1.73 | 0.66 | 0.08 | 3.75E-245 | CMP | STX3 | 0.09 |
| C1orf2281 | 4.09E-241 | 1.55 | 0.59 | 0.06 | 9.49E-237 | CMP | C1orf228 | 0.07 |
| TESPA1 | 3.26E-225 | 1.57 | 0.64 | 0.08 | 7.56E-221 | CMP | TESPA1 | 0.08 |
| GPR34 | 7.20E-225 | 1.11 | 0.42 | 0.03 | 1.67E-220 | CMP | GPR34 | 0.04 |
| CSF2RB1 | 7.78E-192 | 1.12 | 0.46 | 0.05 | 1.81E-187 | CMP | CSF2RB | 0.05 |
| GRAP2 | 4.49E-188 | 1.39 | 0.63 | 0.09 | 1.04E-183 | CMP | GRAP2 | 0.09 |
| RENBP | 5.63E-187 | 1.23 | 0.52 | 0.06 | 1.31E-182 | CMP | RENBP | 0.07 |
| MITF1 | 3.95E-169 | 1.53 | 0.57 | 0.09 | 9.18E-165 | CMP | MITF | 0.09 |
| ADGRE2 | 1.38E-158 | 1.00 | 0.42 | 0.05 | 3.19E-154 | CMP | ADGRE2 | 0.05 |
| PROCR | 1.64E-144 | 1.20 | 0.49 | 0.07 | 3.81E-140 | CMP | PROCR | 0.08 |
| TMEM1542 | 5.37E-143 | 1.27 | 0.55 | 0.09 | 1.25E-138 | CMP | TMEM154 | 0.09 |
| LPCAT2 | 5.31E-131 | 1.34 | 0.54 | 0.10 | 1.23E-126 | CMP | LPCAT2 | 0.10 |
| KLRG1 | 1.33E-118 | 0.91 | 0.48 | 0.07 | 3.08E-114 | CMP | KLRG1 | 0.08 |
| GALC | 4.71E-87 | 1.06 | 0.41 | 0.08 | 1.09E-82 | CMP | GALC | 0.08 |
| MATK | 1.37E-63 | 0.78 | 0.41 | 0.09 | 3.19E-59 | CMP | MATK | 0.09 |
| SAA2 | 0 | 3.46 | 0.80 | 0.02 | 0 | CNV_1 | SAA2 | 0.09 |
| MMP7 | 0 | 2.26 | 0.64 | 0.03 | 0 | CNV_1 | MMP7 | 0.09 |
| CHRDL2 | 0 | 2.13 | 0.70 | 0.01 | 0 | CNV_1 | CHRDL2 | 0.07 |
| VGLL1 | 0 | 2.05 | 0.85 | 0.02 | 0 | CNV_1 | VGLL1 | 0.10 |
| OVOS2 | 0 | 1.99 | 0.49 | 0.01 | 0 | CNV_1 | OVOS2 | 0.06 |
| LINC01315 | 0 | 1.78 | 0.83 | 0.03 | 0 | CNV_1 | LINC01315 | 0.10 |
| RP11-19E11.1 | 0 | 1.74 | 0.84 | 0.02 | 0 | CNV_1 | RP11-19E11.1 | 0.09 |
| MSLN | 0 | 1.61 | 0.68 | 0.01 | 0 | CNV_1 | MSLN | 0.07 |
| KRT5 | 0 | 1.61 | 0.75 | 0.03 | 0 | CNV_1 | KRT5 | 0.09 |
| KRT6B | 0 | 1.54 | 0.69 | 0.02 | 0 | CNV_1 | KRT6B | 0.08 |
| EN1 | 0 | 1.43 | 0.78 | 0.03 | 0 | CNV_1 | EN1 | 0.09 |
| TMEM213 | 0 | 1.38 | 0.63 | 0.00 | 0 | CNV_1 | TMEM213 | 0.06 |
| KLK11 | 0 | 1.37 | 0.61 | 0.01 | 0 | CNV_1 | KLK11 | 0.06 |
| SERPINB5 | 0 | 1.34 | 0.74 | 0.02 | 0 | CNV_1 | SERPINB5 | 0.09 |
| CP | 0 | 1.29 | 0.69 | 0.03 | 0 | CNV_1 | CP | 0.09 |
| NDUFA4L2 | 0 | 1.24 | 0.50 | 0.06 | 0 | CNV_1 | NDUFA4L2 | 0.10 |
| LAMB3 | 0 | 1.19 | 0.74 | 0.02 | 0 | CNV_1 | LAMB3 | 0.09 |
| MYH11 | 0 | 1.19 | 0.49 | 0.02 | 0 | CNV_1 | MYH11 | 0.06 |
| ROPN1B | 0 | 1.18 | 0.69 | 0.02 | 0 | CNV_1 | ROPN1B | 0.08 |
| CITED4 | 0 | 1.18 | 0.71 | 0.03 | 0 | CNV_1 | CITED4 | 0.09 |
| GJC3 | 0 | 1.18 | 0.60 | 0.01 | 0 | CNV_1 | GJC3 | 0.06 |
| SH3BGR | 0 | 1.16 | 0.70 | 0.02 | 0 | CNV_1 | SH3BGR | 0.08 |
| C5orf66-AS1 | 0 | 1.12 | 0.70 | 0.01 | 0 | CNV_1 | C5orf66-AS1 | 0.07 |
| KRT16 | 0 | 1.10 | 0.54 | 0.02 | 0 | CNV_1 | KRT16 | 0.07 |
| GABRP | 0 | 1.06 | 0.74 | 0.03 | 0 | CNV_1 | GABRP | 0.09 |
| NTRK2 | 0 | 1.06 | 0.69 | 0.03 | 0 | CNV_1 | NTRK2 | 0.09 |
| HRCT1 | 0 | 1.00 | 0.62 | 0.02 | 0 | CNV_1 | HRCT1 | 0.08 |
| KLF5 | 0 | 0.99 | 0.68 | 0.04 | 0 | CNV_1 | KLF5 | 0.09 |
| HIST1H2AE | 0 | 0.99 | 0.66 | 0.03 | 0 | CNV_1 | HIST1H2AE | 0.09 |
| GPSM2 | 0 | 0.97 | 0.67 | 0.04 | 0 | CNV_1 | GPSM2 | 0.10 |
| C19orf33 | 0 | 0.95 | 0.57 | 0.03 | 0 | CNV_1 | C19orf33 | 0.08 |
| FOXP4-AS1 | 0 | 0.95 | 0.63 | 0.01 | 0 | CNV_1 | FOXP4-AS1 | 0.06 |
| FOXC2 | 0 | 0.95 | 0.68 | 0.01 | 0 | CNV_1 | FOXC2 | 0.07 |
| COL9A3 | 0 | 0.93 | 0.56 | 0.03 | 0 | CNV_1 | COL9A3 | 0.08 |
| C6orf132 | 0 | 0.91 | 0.63 | 0.04 | 0 | CNV_1 | C6orf132 | 0.10 |
| CDH3 | 0 | 0.90 | 0.62 | 0.02 | 0 | CNV_1 | CDH3 | 0.08 |
| ELF5 | 0 | 0.86 | 0.53 | 0.02 | 0 | CNV_1 | ELF5 | 0.06 |
| LINC01235 | 0 | 0.86 | 0.44 | 0.01 | 0 | CNV_1 | LINC01235 | 0.05 |
| MFI2 | 0 | 0.85 | 0.64 | 0.03 | 0 | CNV_1 | MFI2 | 0.09 |
| ENHO | 0 | 0.83 | 0.58 | 0.01 | 0 | CNV_1 | ENHO | 0.06 |
| TNNT1 | 0 | 0.83 | 0.61 | 0.03 | 0 | CNV_1 | TNNT1 | 0.08 |
| FAM107A | 0 | 0.83 | 0.63 | 0.02 | 0 | CNV_1 | FAM107A | 0.07 |
| ATP6V1B1 | 0 | 0.83 | 0.43 | 0.01 | 0 | CNV_1 | ATP6V1B1 | 0.05 |
| GLYATL2 | 0 | 0.80 | 0.46 | 0.02 | 0 | CNV_1 | GLYATL2 | 0.06 |
| BPI | 0 | 0.79 | 0.48 | 0.01 | 0 | CNV_1 | BPI | 0.05 |
| VTCN1 | 0 | 0.79 | 0.62 | 0.03 | 0 | CNV_1 | VTCN1 | 0.09 |
| DLX5 | 0 | 0.79 | 0.59 | 0.03 | 0 | CNV_1 | DLX5 | 0.08 |
| C16orf74 | 0 | 0.76 | 0.59 | 0.04 | 0 | CNV_1 | C16orf74 | 0.09 |
| LEMD1 | 0 | 0.76 | 0.53 | 0.01 | 0 | CNV_1 | LEMD1 | 0.06 |
| ANXA3 | 0 | 0.76 | 0.49 | 0.03 | 0 | CNV_1 | ANXA3 | 0.07 |
| CLDN15 | 0 | 0.75 | 0.63 | 0.05 | 0 | CNV_1 | CLDN15 | 0.10 |
| PRRX2 | 0 | 0.75 | 0.57 | 0.04 | 0 | CNV_1 | PRRX2 | 0.09 |
| RP5-827C21.4 | 0 | 0.75 | 0.62 | 0.04 | 0 | CNV_1 | RP5-827C21.4 | 0.09 |
| IMPA2 | 0 | 0.73 | 0.59 | 0.04 | 0 | CNV_1 | IMPA2 | 0.09 |
| AC116614.1 | 0 | 0.73 | 0.51 | 0.00 | 0 | CNV_1 | AC116614.1 | 0.05 |
| RTN2 | 0 | 0.73 | 0.59 | 0.03 | 0 | CNV_1 | RTN2 | 0.08 |
| DSG3 | 0 | 0.73 | 0.55 | 0.01 | 0 | CNV_1 | DSG3 | 0.06 |
| HIST2H2BE | 0 | 0.73 | 0.55 | 0.04 | 0 | CNV_1 | HIST2H2BE | 0.08 |
| PROM1 | 0 | 0.73 | 0.57 | 0.02 | 0 | CNV_1 | PROM1 | 0.07 |
| DOK5 | 0 | 0.72 | 0.55 | 0.03 | 0 | CNV_1 | DOK5 | 0.07 |
| FAM150B | 0 | 0.71 | 0.49 | 0.00 | 0 | CNV_1 | FAM150B | 0.04 |
| NXPH4 | 0 | 0.71 | 0.53 | 0.03 | 0 | CNV_1 | NXPH4 | 0.08 |
| LINC00392 | 0 | 0.70 | 0.53 | 0.00 | 0 | CNV_1 | LINC00392 | 0.05 |
| C1orf106 | 0 | 0.69 | 0.54 | 0.02 | 0 | CNV_1 | C1orf106 | 0.06 |
| HACD1 | 0 | 0.68 | 0.58 | 0.05 | 0 | CNV_1 | HACD1 | 0.09 |
| PRKAR2B | 0 | 0.68 | 0.49 | 0.03 | 0 | CNV_1 | PRKAR2B | 0.07 |
| TM4SF1-AS1 | 0 | 0.67 | 0.44 | 0.01 | 0 | CNV_1 | TM4SF1-AS1 | 0.05 |
| CXADR | 0 | 0.66 | 0.54 | 0.03 | 0 | CNV_1 | CXADR | 0.08 |
| NTRK3 | 0 | 0.66 | 0.52 | 0.01 | 0 | CNV_1 | NTRK3 | 0.06 |
| CA8 | 0 | 0.66 | 0.50 | 0.02 | 0 | CNV_1 | CA8 | 0.06 |
| NPR3 | 0 | 0.66 | 0.44 | 0.01 | 0 | CNV_1 | NPR3 | 0.05 |
| PART1 | 0 | 0.65 | 0.53 | 0.02 | 0 | CNV_1 | PART1 | 0.07 |
| RP11-66N11.8 | 0 | 0.64 | 0.58 | 0.04 | 0 | CNV_1 | RP11-66N11.8 | 0.09 |
| RP11-178L8.7 | 0 | 0.64 | 0.50 | 0.01 | 0 | CNV_1 | RP11-178L8.7 | 0.05 |
| SAP30 | 0 | 0.63 | 0.54 | 0.04 | 0 | CNV_1 | SAP30 | 0.09 |
| CDH19 | 0 | 0.62 | 0.46 | 0.00 | 0 | CNV_1 | CDH19 | 0.04 |
| RBP7 | 0 | 0.62 | 0.57 | 0.05 | 0 | CNV_1 | RBP7 | 0.10 |
| ITGB4 | 0 | 0.61 | 0.56 | 0.05 | 0 | CNV_1 | ITGB4 | 0.10 |
| PKP1 | 0 | 0.59 | 0.52 | 0.02 | 0 | CNV_1 | PKP1 | 0.07 |
| KLC3 | 0 | 0.59 | 0.50 | 0.01 | 0 | CNV_1 | KLC3 | 0.06 |
| RP11-505K9.1 | 0 | 0.58 | 0.52 | 0.02 | 0 | CNV_1 | RP11-505K9.1 | 0.07 |
| CHMP4C | 0 | 0.58 | 0.53 | 0.04 | 0 | CNV_1 | CHMP4C | 0.08 |
| MFI2-AS1 | 0 | 0.57 | 0.51 | 0.01 | 0 | CNV_1 | MFI2-AS1 | 0.06 |
| STAP2 | 0 | 0.57 | 0.54 | 0.05 | 0 | CNV_1 | STAP2 | 0.10 |
| SOX9 | 0 | 0.56 | 0.54 | 0.05 | 0 | CNV_1 | SOX9 | 0.10 |
| PITX1 | 0 | 0.56 | 0.49 | 0.02 | 0 | CNV_1 | PITX1 | 0.06 |
| PEG10 | 0 | 0.56 | 0.53 | 0.03 | 0 | CNV_1 | PEG10 | 0.08 |
| MATN2 | 0 | 0.55 | 0.43 | 0.04 | 0 | CNV_1 | MATN2 | 0.07 |
| GPRC5A | 0 | 0.54 | 0.47 | 0.05 | 0 | CNV_1 | GPRC5A | 0.09 |
| CDC42EP5 | 0 | 0.54 | 0.48 | 0.04 | 0 | CNV_1 | CDC42EP5 | 0.08 |
| VIT | 0 | 0.54 | 0.41 | 0.00 | 0 | CNV_1 | VIT | 0.04 |
| RP11-319G6.1 | 0 | 0.54 | 0.44 | 0.03 | 0 | CNV_1 | RP11-319G6.1 | 0.07 |
| RP11-385F7.1 | 0 | 0.54 | 0.50 | 0.01 | 0 | CNV_1 | RP11-385F7.1 | 0.05 |
| CA11 | 0 | 0.53 | 0.52 | 0.04 | 0 | CNV_1 | CA11 | 0.08 |
| RP11-111M22.3 | 0 | 0.53 | 0.53 | 0.04 | 0 | CNV_1 | RP11-111M22.3 | 0.09 |
| TLE2 | 0 | 0.53 | 0.52 | 0.03 | 0 | CNV_1 | TLE2 | 0.08 |
| MRPS17 | 0 | 0.53 | 0.50 | 0.04 | 0 | CNV_1 | MRPS17 | 0.08 |
| FOXC2-AS1 | 0 | 0.52 | 0.43 | 0.00 | 0 | CNV_1 | FOXC2-AS1 | 0.04 |
| TMEM139 | 0 | 0.52 | 0.41 | 0.01 | 0 | CNV_1 | TMEM139 | 0.05 |
| RP11-798M19.6 | 0 | 0.51 | 0.45 | 0.04 | 0 | CNV_1 | RP11-798M19.6 | 0.07 |
| MB | 0 | 0.51 | 0.46 | 0.04 | 0 | CNV_1 | MB | 0.07 |
| GCAT | 0 | 0.51 | 0.49 | 0.05 | 0 | CNV_1 | GCAT | 0.09 |
| RNF152 | 0 | 0.50 | 0.44 | 0.02 | 0 | CNV_1 | RNF152 | 0.06 |
| MPZL2 | 0 | 0.50 | 0.47 | 0.04 | 0 | CNV_1 | MPZL2 | 0.08 |
| CTD-2015G9.2 | 0 | 0.50 | 0.42 | 0.00 | 0 | CNV_1 | CTD-2015G9.2 | 0.04 |
| AC004951.6 | 0 | 0.50 | 0.50 | 0.03 | 0 | CNV_1 | AC004951.6 | 0.07 |
| TRIM29 | 0 | 0.49 | 0.47 | 0.02 | 0 | CNV_1 | TRIM29 | 0.06 |
| ID4 | 0 | 0.49 | 0.43 | 0.04 | 0 | CNV_1 | ID4 | 0.08 |
| PC | 0 | 0.48 | 0.45 | 0.03 | 0 | CNV_1 | PC | 0.07 |
| SOX6 | 0 | 0.48 | 0.45 | 0.02 | 0 | CNV_1 | SOX6 | 0.06 |
| EPHB31 | 0 | 0.48 | 0.49 | 0.06 | 0 | CNV_1 | EPHB3 | 0.10 |
| RNF150 | 0 | 0.48 | 0.45 | 0.02 | 0 | CNV_1 | RNF150 | 0.06 |
| ERV3-1 | 0 | 0.47 | 0.50 | 0.06 | 0 | CNV_1 | ERV3-1 | 0.10 |
| EHF | 0 | 0.47 | 0.51 | 0.05 | 0 | CNV_1 | EHF | 0.09 |
| ADCY2 | 0 | 0.47 | 0.45 | 0.01 | 0 | CNV_1 | ADCY2 | 0.05 |
| RNF169 | 0 | 0.46 | 0.51 | 0.06 | 0 | CNV_1 | RNF169 | 0.10 |
| CTD-3184A7.4 | 0 | 0.46 | 0.48 | 0.04 | 0 | CNV_1 | CTD-3184A7.4 | 0.08 |
| CRISPLD11 | 0 | 0.45 | 0.49 | 0.06 | 0 | CNV_1 | CRISPLD1 | 0.10 |
| QPRT | 0 | 0.45 | 0.44 | 0.03 | 0 | CNV_1 | QPRT | 0.07 |
| SNHG21 | 0 | 0.45 | 0.45 | 0.04 | 0 | CNV_1 | SNHG21 | 0.07 |
| CRB3 | 0 | 0.44 | 0.44 | 0.04 | 0 | CNV_1 | CRB3 | 0.08 |
| DHCR7 | 0 | 0.43 | 0.45 | 0.06 | 0 | CNV_1 | DHCR7 | 0.10 |
| SOX10 | 0 | 0.43 | 0.42 | 0.02 | 0 | CNV_1 | SOX10 | 0.06 |
| CCHCR1 | 0 | 0.42 | 0.46 | 0.06 | 0 | CNV_1 | CCHCR1 | 0.09 |
| TFAP2C | 0 | 0.42 | 0.44 | 0.04 | 0 | CNV_1 | TFAP2C | 0.08 |
| TLE6 | 0 | 0.42 | 0.40 | 0.01 | 0 | CNV_1 | TLE6 | 0.05 |
| AP006222.2 | 0 | 0.41 | 0.45 | 0.05 | 0 | CNV_1 | AP006222.2 | 0.08 |
| ESRP1 | 0 | 0.41 | 0.49 | 0.06 | 0 | CNV_1 | ESRP1 | 0.10 |
| LAD1 | 0 | 0.41 | 0.45 | 0.04 | 0 | CNV_1 | LAD1 | 0.07 |
| EMG1 | 0 | 0.41 | 0.47 | 0.05 | 0 | CNV_1 | EMG1 | 0.09 |
| ITGB8 | 0 | 0.41 | 0.41 | 0.03 | 0 | CNV_1 | ITGB8 | 0.07 |
| VWA1 | 0 | 0.40 | 0.46 | 0.06 | 0 | CNV_1 | VWA1 | 0.10 |
| EIF5AL1 | 0 | 0.40 | 0.41 | 0.03 | 0 | CNV_1 | EIF5AL1 | 0.06 |
| BCL11A3 | 0 | 0.39 | 0.45 | 0.05 | 0 | CNV_1 | BCL11A | 0.08 |
| PKP3 | 0 | 0.39 | 0.44 | 0.05 | 0 | CNV_1 | PKP3 | 0.09 |
| AC091729.9 | 0 | 0.39 | 0.41 | 0.03 | 0 | CNV_1 | AC091729.9 | 0.06 |
| RCCD1 | 0 | 0.38 | 0.41 | 0.06 | 0 | CNV_1 | RCCD1 | 0.09 |
| RP11-390E23.6 | 0 | 0.38 | 0.41 | 0.04 | 0 | CNV_1 | RP11-390E23.6 | 0.07 |
| ASCL2 | 0 | 0.38 | 0.43 | 0.06 | 0 | CNV_1 | ASCL2 | 0.09 |
| CCDC102A | 0 | 0.38 | 0.43 | 0.05 | 0 | CNV_1 | CCDC102A | 0.08 |
| PSAT1 | 0 | 0.38 | 0.40 | 0.05 | 0 | CNV_1 | PSAT1 | 0.08 |
| PIGZ | 0 | 0.38 | 0.40 | 0.04 | 0 | CNV_1 | PIGZ | 0.07 |
| RAD51B | 0 | 0.38 | 0.41 | 0.06 | 0 | CNV_1 | RAD51B | 0.09 |
| PRSS8 | 0 | 0.37 | 0.43 | 0.06 | 0 | CNV_1 | PRSS8 | 0.09 |
| MANSC1 | 0 | 0.37 | 0.42 | 0.05 | 0 | CNV_1 | MANSC1 | 0.08 |
| F12 | 0 | 0.37 | 0.41 | 0.04 | 0 | CNV_1 | F12 | 0.08 |
| LRFN4 | 0 | 0.37 | 0.40 | 0.04 | 0 | CNV_1 | LRFN4 | 0.07 |
| RP11-12G12.7 | 0 | 0.37 | 0.41 | 0.05 | 0 | CNV_1 | RP11-12G12.7 | 0.08 |
| ELMO3 | 0 | 0.37 | 0.42 | 0.04 | 0 | CNV_1 | ELMO3 | 0.07 |
| ARHGEF10 | 0 | 0.36 | 0.40 | 0.05 | 0 | CNV_1 | ARHGEF10 | 0.08 |
| C5orf28 | 0 | 0.35 | 0.43 | 0.07 | 0 | CNV_1 | C5orf28 | 0.10 |
| NUDT7 | 0 | 0.35 | 0.41 | 0.04 | 0 | CNV_1 | NUDT7 | 0.07 |
| KAZN | 0 | 0.35 | 0.41 | 0.05 | 0 | CNV_1 | KAZN | 0.08 |
| TRIM2 | 0 | 0.35 | 0.41 | 0.06 | 0 | CNV_1 | TRIM2 | 0.09 |
| EPHB4 | 0 | 0.34 | 0.43 | 0.06 | 0 | CNV_1 | EPHB4 | 0.09 |
| DSC2 | 0 | 0.32 | 0.43 | 0.07 | 0 | CNV_1 | DSC2 | 0.10 |
| GPRC5B | 0 | 0.31 | 0.42 | 0.06 | 0 | CNV_1 | GPRC5B | 0.09 |
| CPB1 | 0 | 6.35 | 0.92 | 0.01 | 0 | CNV_2 | CPB1 | 0.06 |
| TFF3 | 0 | 5.34 | 0.87 | 0.03 | 0 | CNV_2 | TFF3 | 0.07 |
| RP11-53O19.2 | 0 | 3.41 | 0.57 | 0.00 | 0 | CNV_2 | RP11-53O19.2 | 0.03 |
| ANKRD30A | 0 | 3.05 | 0.95 | 0.02 | 0 | CNV_2 | ANKRD30A | 0.07 |
| ESR1 | 0 | 2.76 | 0.87 | 0.03 | 0 | CNV_2 | ESR1 | 0.08 |
| RP11-53O19.1 | 0 | 2.72 | 0.82 | 0.02 | 0 | CNV_2 | RP11-53O19.1 | 0.06 |
| TPRG1 | 0 | 2.64 | 0.86 | 0.04 | 0 | CNV_2 | TPRG1 | 0.08 |
| SMIM22 | 0 | 2.56 | 0.93 | 0.04 | 0 | CNV_2 | SMIM22 | 0.09 |
| PHGR1 | 0 | 2.33 | 0.61 | 0.00 | 0 | CNV_2 | PHGR1 | 0.04 |
| CA2 | 0 | 2.24 | 0.76 | 0.06 | 0 | CNV_2 | CA2 | 0.09 |
| NAT1 | 0 | 2.16 | 0.80 | 0.02 | 0 | CNV_2 | NAT1 | 0.06 |
| SPDEF | 0 | 2.16 | 0.88 | 0.03 | 0 | CNV_2 | SPDEF | 0.07 |
| CTA-392E5.1 | 0 | 2.11 | 0.71 | 0.00 | 0 | CNV_2 | CTA-392E5.1 | 0.04 |
| FSIP1 | 0 | 2.07 | 0.81 | 0.01 | 0 | CNV_2 | FSIP1 | 0.05 |
| SCUBE2 | 0 | 2.06 | 0.59 | 0.05 | 0 | CNV_2 | SCUBE2 | 0.08 |
| GRIA2 | 0 | 1.98 | 0.74 | 0.00 | 0 | CNV_2 | GRIA2 | 0.04 |
| AKR7A3 | 0 | 1.96 | 0.71 | 0.01 | 0 | CNV_2 | AKR7A3 | 0.05 |
| KCNC2 | 0 | 1.93 | 0.70 | 0.00 | 0 | CNV_2 | KCNC2 | 0.04 |
| FAM3B | 0 | 1.85 | 0.76 | 0.01 | 0 | CNV_2 | FAM3B | 0.05 |
| AR | 0 | 1.84 | 0.81 | 0.05 | 0 | CNV_2 | AR | 0.09 |
| AFF33 | 0 | 1.82 | 0.78 | 0.05 | 0 | CNV_2 | AFF3 | 0.09 |
| LRP2 | 0 | 1.79 | 0.69 | 0.01 | 0 | CNV_2 | LRP2 | 0.05 |
| STC2 | 0 | 1.75 | 0.61 | 0.05 | 0 | CNV_2 | STC2 | 0.08 |
| GFRA1 | 0 | 1.72 | 0.55 | 0.02 | 0 | CNV_2 | GFRA1 | 0.05 |
| SLC7A2 | 0 | 1.69 | 0.60 | 0.03 | 0 | CNV_2 | SLC7A2 | 0.06 |
| VSTM2A | 0 | 1.61 | 0.43 | 0.00 | 0 | CNV_2 | VSTM2A | 0.03 |
| STC1 | 0 | 1.57 | 0.55 | 0.02 | 0 | CNV_2 | STC1 | 0.04 |
| KCNJ3 | 0 | 1.56 | 0.67 | 0.00 | 0 | CNV_2 | KCNJ3 | 0.04 |
| FOXA1 | 0 | 1.51 | 0.69 | 0.02 | 0 | CNV_2 | FOXA1 | 0.05 |
| GSTM1 | 0 | 1.48 | 0.70 | 0.03 | 0 | CNV_2 | GSTM1 | 0.07 |
| ERBB4 | 0 | 1.44 | 0.63 | 0.01 | 0 | CNV_2 | ERBB4 | 0.04 |
| TRH | 0 | 1.43 | 0.50 | 0.00 | 0 | CNV_2 | TRH | 0.03 |
| CNTD2 | 0 | 1.42 | 0.58 | 0.01 | 0 | CNV_2 | CNTD2 | 0.04 |
| PTPRT | 0 | 1.42 | 0.65 | 0.01 | 0 | CNV_2 | PTPRT | 0.04 |
| ERBB3 | 0 | 1.42 | 0.70 | 0.07 | 0 | CNV_2 | ERBB3 | 0.10 |
| REEP6 | 0 | 1.36 | 0.68 | 0.04 | 0 | CNV_2 | REEP6 | 0.07 |
| RP11-428L9.2 | 0 | 1.34 | 0.52 | 0.00 | 0 | CNV_2 | RP11-428L9.2 | 0.03 |
| PRLR | 0 | 1.33 | 0.65 | 0.04 | 0 | CNV_2 | PRLR | 0.07 |
| GATA3-AS1 | 0 | 1.28 | 0.56 | 0.01 | 0 | CNV_2 | GATA3-AS1 | 0.04 |
| GPR160 | 0 | 1.27 | 0.65 | 0.04 | 0 | CNV_2 | GPR160 | 0.07 |
| PRR15 | 0 | 1.23 | 0.58 | 0.01 | 0 | CNV_2 | PRR15 | 0.04 |
| DCLK1 | 0 | 1.23 | 0.55 | 0.04 | 0 | CNV_2 | DCLK1 | 0.07 |
| DNAJC12 | 0 | 1.22 | 0.59 | 0.03 | 0 | CNV_2 | DNAJC12 | 0.06 |
| KCNE4 | 0 | 1.18 | 0.48 | 0.03 | 0 | CNV_2 | KCNE4 | 0.06 |
| NOVA1 | 0 | 1.17 | 0.60 | 0.04 | 0 | CNV_2 | NOVA1 | 0.07 |
| LYPD6B | 0 | 1.14 | 0.58 | 0.02 | 0 | CNV_2 | LYPD6B | 0.05 |
| RASEF | 0 | 1.09 | 0.55 | 0.03 | 0 | CNV_2 | RASEF | 0.06 |
| MAP7 | 0 | 1.09 | 0.58 | 0.05 | 0 | CNV_2 | MAP7 | 0.08 |
| HPN | 0 | 1.04 | 0.55 | 0.03 | 0 | CNV_2 | HPN | 0.05 |
| CDHR3 | 0 | 1.03 | 0.46 | 0.03 | 0 | CNV_2 | CDHR3 | 0.05 |
| THSD4 | 0 | 1.00 | 0.50 | 0.02 | 0 | CNV_2 | THSD4 | 0.04 |
| TM7SF2 | 0 | 0.98 | 0.50 | 0.06 | 0 | CNV_2 | TM7SF2 | 0.08 |
| VAV3 | 0 | 0.97 | 0.56 | 0.07 | 0 | CNV_2 | VAV3 | 0.09 |
| DNALI1 | 0 | 0.97 | 0.54 | 0.02 | 0 | CNV_2 | DNALI1 | 0.05 |
| NEDD4L | 0 | 0.96 | 0.53 | 0.07 | 0 | CNV_2 | NEDD4L | 0.09 |
| TMEM150C | 0 | 0.96 | 0.45 | 0.04 | 0 | CNV_2 | TMEM150C | 0.06 |
| LDLRAD3 | 0 | 0.95 | 0.52 | 0.07 | 0 | CNV_2 | LDLRAD3 | 0.09 |
| DEGS2 | 0 | 0.94 | 0.48 | 0.04 | 0 | CNV_2 | DEGS2 | 0.06 |
| C9orf152 | 0 | 0.92 | 0.50 | 0.01 | 0 | CNV_2 | C9orf152 | 0.04 |
| TMEM25 | 0 | 0.91 | 0.58 | 0.06 | 0 | CNV_2 | TMEM25 | 0.09 |
| SLC44A4 | 0 | 0.90 | 0.47 | 0.01 | 0 | CNV_2 | SLC44A4 | 0.04 |
| ZNF552 | 0 | 0.89 | 0.45 | 0.04 | 0 | CNV_2 | ZNF552 | 0.06 |
| LYPD3 | 0 | 0.89 | 0.51 | 0.07 | 0 | CNV_2 | LYPD3 | 0.10 |
| SLC19A2 | 0 | 0.89 | 0.46 | 0.04 | 0 | CNV_2 | SLC19A2 | 0.06 |
| LRRC261 | 0 | 0.88 | 0.46 | 0.03 | 0 | CNV_2 | LRRC26 | 0.05 |
| AC008268.1 | 0 | 0.88 | 0.46 | 0.01 | 0 | CNV_2 | AC008268.1 | 0.03 |
| HSD17B14 | 0 | 0.83 | 0.48 | 0.07 | 0 | CNV_2 | HSD17B14 | 0.09 |
| DMKN | 0 | 0.83 | 0.49 | 0.08 | 0 | CNV_2 | DMKN | 0.10 |
| TTC39A | 0 | 0.82 | 0.46 | 0.03 | 0 | CNV_2 | TTC39A | 0.05 |
| AP1M2 | 0 | 0.82 | 0.53 | 0.08 | 0 | CNV_2 | AP1M2 | 0.10 |
| LURAP1L | 0 | 0.82 | 0.44 | 0.05 | 0 | CNV_2 | LURAP1L | 0.07 |
| TBX3 | 0 | 0.79 | 0.49 | 0.08 | 0 | CNV_2 | TBX3 | 0.10 |
| CACNB3 | 0 | 0.79 | 0.47 | 0.06 | 0 | CNV_2 | CACNB3 | 0.08 |
| MAPT | 0 | 0.78 | 0.42 | 0.02 | 0 | CNV_2 | MAPT | 0.04 |
| CASZ1 | 0 | 0.78 | 0.44 | 0.04 | 0 | CNV_2 | CASZ1 | 0.06 |
| ENTPD5 | 0 | 0.73 | 0.42 | 0.05 | 0 | CNV_2 | ENTPD5 | 0.07 |
| TMC5 | 0 | 0.72 | 0.41 | 0.02 | 0 | CNV_2 | TMC5 | 0.04 |
| CELSR1 | 0 | 0.70 | 0.41 | 0.03 | 0 | CNV_2 | CELSR1 | 0.05 |
| ARFGEF3 | 0 | 0.70 | 0.41 | 0.03 | 0 | CNV_2 | ARFGEF3 | 0.05 |
| CCDC74A | 0 | 0.70 | 0.41 | 0.05 | 0 | CNV_2 | CCDC74A | 0.07 |
| TMC4 | 0 | 0.69 | 0.44 | 0.06 | 0 | CNV_2 | TMC4 | 0.08 |
| CCDC126 | 0 | 0.69 | 0.44 | 0.07 | 0 | CNV_2 | CCDC126 | 0.09 |
| ARHGAP32 | 0 | 0.66 | 0.41 | 0.06 | 0 | CNV_2 | ARHGAP32 | 0.08 |
| INADL | 0 | 0.65 | 0.43 | 0.08 | 0 | CNV_2 | INADL | 0.10 |
| RP11-983P16.4 | 0 | 0.65 | 0.40 | 0.05 | 0 | CNV_2 | RP11-983P16.4 | 0.07 |
| CLDN3 | 0 | 0.61 | 0.47 | 0.06 | 0 | CNV_2 | CLDN3 | 0.08 |
| MEGF9 | 0 | 0.61 | 0.40 | 0.06 | 0 | CNV_2 | MEGF9 | 0.08 |
| KIF16B | 0 | 0.59 | 0.40 | 0.08 | 0 | CNV_2 | KIF16B | 0.10 |
| LTF | 0 | 3.23 | 0.41 | 0.02 | 0 | CNV_3 | LTF | 0.03 |
| GABRP1 | 0 | 2.28 | 0.62 | 0.08 | 0 | CNV_3 | GABRP | 0.09 |
| CLDN31 | 0 | 1.72 | 0.57 | 0.07 | 0 | CNV_3 | CLDN3 | 0.08 |
| SMIM221 | 0 | 0.97 | 0.56 | 0.08 | 0 | CNV_3 | SMIM22 | 0.09 |
| MMP71 | 1.87E-227 | 2.27 | 0.45 | 0.08 | 4.34E-223 | CNV_3 | MMP7 | 0.09 |
| EHF2 | 1.71E-225 | 1.07 | 0.46 | 0.08 | 3.98E-221 | CNV_3 | EHF | 0.09 |
| DSC21 | 5.37E-197 | 0.96 | 0.46 | 0.09 | 1.25E-192 | CNV_3 | DSC2 | 0.10 |
| BEX2 | 4.45E-161 | 0.59 | 0.41 | 0.08 | 1.03E-156 | CNV_3 | BEX2 | 0.09 |
| SOX91 | 1.36E-143 | 0.78 | 0.40 | 0.09 | 3.16E-139 | CNV_3 | SOX9 | 0.10 |
| CALML5 | 0 | 4.53 | 0.87 | 0.03 | 0 | CNV_4 | CALML5 | 0.04 |
| CRABP11 | 0 | 3.84 | 0.89 | 0.06 | 0 | CNV_4 | CRABP1 | 0.08 |
| ACTG21 | 0 | 3.84 | 0.79 | 0.05 | 0 | CNV_4 | ACTG2 | 0.06 |
| KLK5 | 0 | 2.85 | 0.50 | 0.01 | 0 | CNV_4 | KLK5 | 0.02 |
| LY6K | 9.76E-299 | 1.32 | 0.42 | 0.04 | 2.27E-294 | CNV_4 | LY6K | 0.05 |
| KRT51 | 2.07E-254 | 1.88 | 0.53 | 0.09 | 4.80E-250 | CNV_4 | KRT5 | 0.09 |
| KRT6B1 | 1.73E-253 | 2.27 | 0.48 | 0.07 | 4.03E-249 | CNV_4 | KRT6B | 0.08 |
| CSRP2 | 2.50E-224 | 1.69 | 0.48 | 0.08 | 5.80E-220 | CNV_4 | CSRP2 | 0.08 |
| KRT161 | 8.12E-206 | 2.57 | 0.40 | 0.06 | 1.88E-201 | CNV_4 | KRT16 | 0.07 |
| VGLL11 | 2.62E-185 | 1.50 | 0.48 | 0.09 | 6.09E-181 | CNV_4 | VGLL1 | 0.10 |
| STC21 | 0 | 2.92 | 0.66 | 0.07 | 0 | CNV_5 | STC2 | 0.08 |
| WFDC21 | 0 | 2.46 | 0.70 | 0.04 | 0 | CNV_5 | WFDC2 | 0.05 |
| PI15 | 0 | 2.09 | 0.41 | 0.03 | 0 | CNV_5 | PI15 | 0.04 |
| AGR2 | 0 | 2.09 | 0.43 | 0.03 | 0 | CNV_5 | AGR2 | 0.04 |
| CLDN32 | 0 | 1.90 | 0.73 | 0.07 | 0 | CNV_5 | CLDN3 | 0.08 |
| TMC51 | 0 | 1.54 | 0.54 | 0.03 | 0 | CNV_5 | TMC5 | 0.04 |
| TFAP2B | 0 | 1.54 | 0.57 | 0.02 | 0 | CNV_5 | TFAP2B | 0.03 |
| PRLR1 | 0 | 1.50 | 0.63 | 0.06 | 0 | CNV_5 | PRLR | 0.07 |
| SPDEF1 | 0 | 1.47 | 0.65 | 0.07 | 0 | CNV_5 | SPDEF | 0.07 |
| ALDH3B2 | 0 | 1.44 | 0.48 | 0.03 | 0 | CNV_5 | ALDH3B2 | 0.04 |
| AK5 | 0 | 1.31 | 0.51 | 0.02 | 0 | CNV_5 | AK5 | 0.03 |
| NTN4 | 0 | 1.29 | 0.52 | 0.04 | 0 | CNV_5 | NTN4 | 0.04 |
| TM4SF18 | 0 | 1.20 | 0.47 | 0.04 | 0 | CNV_5 | TM4SF18 | 0.05 |
| ERBB41 | 0 | 1.06 | 0.46 | 0.04 | 0 | CNV_5 | ERBB4 | 0.04 |
| ARHGEF38 | 0 | 1.06 | 0.47 | 0.02 | 0 | CNV_5 | ARHGEF38 | 0.02 |
| RAB27B1 | 1.27E-304 | 0.97 | 0.51 | 0.05 | 2.94E-300 | CNV_5 | RAB27B | 0.06 |
| C8orf4 | 4.54E-294 | 1.97 | 0.44 | 0.04 | 1.05E-289 | CNV_5 | C8orf4 | 0.05 |
| RASEF1 | 1.64E-292 | 1.13 | 0.51 | 0.06 | 3.81E-288 | CNV_5 | RASEF | 0.06 |
| BIK1 | 8.50E-273 | 0.92 | 0.48 | 0.05 | 1.97E-268 | CNV_5 | BIK | 0.06 |
| SMIM222 | 2.27E-269 | 1.06 | 0.63 | 0.08 | 5.27E-265 | CNV_5 | SMIM22 | 0.09 |
| TBX31 | 7.97E-249 | 1.44 | 0.60 | 0.09 | 1.85E-244 | CNV_5 | TBX3 | 0.10 |
| PHYHD11 | 7.70E-247 | 0.81 | 0.46 | 0.05 | 1.79E-242 | CNV_5 | PHYHD1 | 0.06 |
| AR1 | 2.33E-246 | 1.15 | 0.59 | 0.08 | 5.41E-242 | CNV_5 | AR | 0.09 |
| TTC39A1 | 1.96E-240 | 0.75 | 0.44 | 0.05 | 4.56E-236 | CNV_5 | TTC39A | 0.05 |
| ERBB32 | 3.32E-239 | 1.19 | 0.60 | 0.09 | 7.71E-235 | CNV_5 | ERBB3 | 0.10 |
| FOXA11 | 2.51E-236 | 0.73 | 0.44 | 0.05 | 5.82E-232 | CNV_5 | FOXA1 | 0.05 |
| LRRC262 | 2.40E-232 | 1.07 | 0.43 | 0.05 | 5.58E-228 | CNV_5 | LRRC26 | 0.05 |
| CAB39L | 1.38E-231 | 0.76 | 0.45 | 0.05 | 3.21E-227 | CNV_5 | CAB39L | 0.06 |
| IL20RA1 | 4.32E-229 | 0.90 | 0.43 | 0.05 | 1.00E-224 | CNV_5 | IL20RA | 0.05 |
| VTCN12 | 5.62E-220 | 1.35 | 0.53 | 0.08 | 1.30E-215 | CNV_5 | VTCN1 | 0.09 |
| LIMCH11 | 4.67E-215 | 1.19 | 0.57 | 0.09 | 1.08E-210 | CNV_5 | LIMCH1 | 0.10 |
| ANKRD30A1 | 3.44E-212 | 2.60 | 0.49 | 0.06 | 7.98E-208 | CNV_5 | ANKRD30A | 0.07 |
| TSPAN151 | 7.36E-210 | 1.07 | 0.55 | 0.09 | 1.71E-205 | CNV_5 | TSPAN15 | 0.09 |
| REEP61 | 9.78E-209 | 0.87 | 0.49 | 0.07 | 2.27E-204 | CNV_5 | REEP6 | 0.07 |
| GALNT62 | 7.59E-196 | 1.06 | 0.50 | 0.08 | 1.76E-191 | CNV_5 | GALNT6 | 0.08 |
| DEGS21 | 1.32E-194 | 0.78 | 0.43 | 0.06 | 3.06E-190 | CNV_5 | DEGS2 | 0.06 |
| AFF34 | 8.39E-189 | 1.05 | 0.54 | 0.08 | 1.95E-184 | CNV_5 | AFF3 | 0.09 |
| PVRL41 | 1.49E-184 | 0.77 | 0.42 | 0.06 | 3.45E-180 | CNV_5 | PVRL4 | 0.06 |
| ANXA31 | 5.62E-181 | 0.86 | 0.46 | 0.07 | 1.30E-176 | CNV_5 | ANXA3 | 0.07 |
| ESR11 | 6.97E-172 | 1.21 | 0.47 | 0.07 | 1.62E-167 | CNV_5 | ESR1 | 0.08 |
| AP1M22 | 2.19E-169 | 0.82 | 0.53 | 0.09 | 5.07E-165 | CNV_5 | AP1M2 | 0.10 |
| PIP | 2.15E-167 | 3.08 | 0.40 | 0.06 | 5.00E-163 | CNV_5 | PIP | 0.06 |
| RNASE41 | 1.56E-166 | 0.89 | 0.52 | 0.09 | 3.61E-162 | CNV_5 | RNASE4 | 0.10 |
| VAV31 | 2.82E-156 | 0.91 | 0.50 | 0.09 | 6.54E-152 | CNV_5 | VAV3 | 0.09 |
| NEDD4L1 | 2.07E-152 | 0.97 | 0.48 | 0.09 | 4.80E-148 | CNV_5 | NEDD4L | 0.09 |
| ACADSB1 | 2.19E-152 | 0.83 | 0.44 | 0.07 | 5.09E-148 | CNV_5 | ACADSB | 0.08 |
| LYPD31 | 1.15E-130 | 0.76 | 0.47 | 0.09 | 2.66E-126 | CNV_5 | LYPD3 | 0.10 |
| RIC32 | 4.70E-127 | 0.59 | 0.43 | 0.07 | 1.09E-122 | CNV_5 | RIC3 | 0.08 |
| SCUBE21 | 1.03E-124 | 0.92 | 0.42 | 0.08 | 2.39E-120 | CNV_5 | SCUBE2 | 0.08 |
| SC5D | 4.19E-124 | 0.81 | 0.46 | 0.09 | 9.74E-120 | CNV_5 | SC5D | 0.10 |
| TMC42 | 2.49E-118 | 0.61 | 0.40 | 0.08 | 5.79E-114 | CNV_5 | TMC4 | 0.08 |
| DMKN3 | 3.26E-110 | 0.60 | 0.45 | 0.09 | 7.57E-106 | CNV_5 | DMKN | 0.10 |
| C17orf58 | 2.74E-101 | 0.77 | 0.41 | 0.09 | 6.37E-97 | CNV_5 | C17orf58 | 0.09 |
| ARSD1 | 7.48E-94 | 0.58 | 0.42 | 0.09 | 1.74E-89 | CNV_5 | ARSD | 0.10 |
| ALOX53 | 1.48E-88 | 0.58 | 0.41 | 0.09 | 3.44E-84 | CNV_5 | ALOX5 | 0.09 |
| INADL1 | 2.35E-88 | 0.66 | 0.41 | 0.10 | 5.46E-84 | CNV_5 | INADL | 0.10 |
| GRB71 | 0 | 2.68 | 0.66 | 0.05 | 0 | CNV_6 | GRB7 | 0.05 |
| GSDMB | 0 | 1.92 | 0.49 | 0.03 | 0 | CNV_6 | GSDMB | 0.03 |
| AGR31 | 0 | 1.38 | 0.46 | 0.01 | 0 | CNV_6 | AGR3 | 0.02 |
| CTD-2626G11.2 | 0 | 0.82 | 0.43 | 0.01 | 0 | CNV_6 | CTD-2626G11.2 | 0.01 |
| LRRC263 | 1.98E-256 | 2.11 | 0.60 | 0.05 | 4.60E-252 | CNV_6 | LRRC26 | 0.05 |
| ENTPD2 | 3.08E-229 | 0.86 | 0.41 | 0.03 | 7.14E-225 | CNV_6 | ENTPD2 | 0.03 |
| CACNB1 | 3.42E-199 | 1.51 | 0.42 | 0.03 | 7.94E-195 | CNV_6 | CACNB1 | 0.03 |
| STAC21 | 9.26E-193 | 3.84 | 0.56 | 0.06 | 2.15E-188 | CNV_6 | STAC2 | 0.06 |
| PGAP3 | 1.09E-175 | 2.39 | 0.62 | 0.08 | 2.52E-171 | CNV_6 | PGAP3 | 0.08 |
| SMIM223 | 2.03E-168 | 1.72 | 0.66 | 0.09 | 4.71E-164 | CNV_6 | SMIM22 | 0.09 |
| SPDEF2 | 5.48E-163 | 1.47 | 0.60 | 0.07 | 1.27E-158 | CNV_6 | SPDEF | 0.07 |
| HIST1H2BK1 | 9.83E-135 | 1.89 | 0.56 | 0.08 | 2.28E-130 | CNV_6 | HIST1H2BK | 0.09 |
| ARFGEF32 | 7.37E-120 | 0.68 | 0.44 | 0.05 | 1.71E-115 | CNV_6 | ARFGEF3 | 0.05 |
| SNCG | 4.41E-115 | 1.10 | 0.42 | 0.05 | 1.02E-110 | CNV_6 | SNCG | 0.05 |
| NAALADL21 | 4.90E-110 | 0.87 | 0.41 | 0.05 | 1.14E-105 | CNV_6 | NAALADL2 | 0.05 |
| HPN1 | 7.70E-107 | 0.64 | 0.42 | 0.05 | 1.79E-102 | CNV_6 | HPN | 0.05 |
| GPRC5A3 | 2.05E-101 | 1.79 | 0.50 | 0.08 | 4.75E-97 | CNV_6 | GPRC5A | 0.09 |
| PRLR2 | 5.75E-101 | 1.07 | 0.47 | 0.07 | 1.34E-96 | CNV_6 | PRLR | 0.07 |
| TFF31 | 2.13E-86 | 0.64 | 0.45 | 0.07 | 4.95E-82 | CNV_6 | TFF3 | 0.07 |
| CLDN33 | 2.50E-86 | 1.09 | 0.48 | 0.08 | 5.80E-82 | CNV_6 | CLDN3 | 0.08 |
| AR2 | 3.98E-82 | 0.87 | 0.49 | 0.09 | 9.24E-78 | CNV_6 | AR | 0.09 |
| DEPTOR | 1.38E-79 | 0.58 | 0.41 | 0.06 | 3.19E-75 | CNV_6 | DEPTOR | 0.07 |
| SH3BP42 | 1.96E-79 | 0.65 | 0.41 | 0.07 | 4.55E-75 | CNV_6 | SH3BP4 | 0.07 |
| TMC43 | 1.98E-76 | 0.58 | 0.44 | 0.08 | 4.60E-72 | CNV_6 | TMC4 | 0.08 |
| TSPAN152 | 7.16E-72 | 0.78 | 0.47 | 0.09 | 1.66E-67 | CNV_6 | TSPAN15 | 0.09 |
| VTCN13 | 2.82E-68 | 0.89 | 0.44 | 0.08 | 6.54E-64 | CNV_6 | VTCN1 | 0.09 |
| C19orf332 | 2.64E-67 | 0.74 | 0.42 | 0.08 | 6.14E-63 | CNV_6 | C19orf33 | 0.08 |
| PRSS84 | 3.62E-67 | 0.69 | 0.45 | 0.09 | 8.40E-63 | CNV_6 | PRSS8 | 0.09 |
| KIF16B2 | 6.47E-62 | 0.65 | 0.45 | 0.09 | 1.50E-57 | CNV_6 | KIF16B | 0.10 |
| VAV32 | 4.78E-59 | 0.67 | 0.45 | 0.09 | 1.11E-54 | CNV_6 | VAV3 | 0.09 |
| AP1M23 | 1.48E-58 | 0.71 | 0.46 | 0.10 | 3.44E-54 | CNV_6 | AP1M2 | 0.10 |
| EHF4 | 2.25E-56 | 0.81 | 0.42 | 0.09 | 5.22E-52 | CNV_6 | EHF | 0.09 |
| SEMA3C2 | 2.53E-55 | 0.83 | 0.41 | 0.08 | 5.87E-51 | CNV_6 | SEMA3C | 0.08 |
| LIMCH12 | 1.37E-48 | 0.58 | 0.42 | 0.10 | 3.18E-44 | CNV_6 | LIMCH1 | 0.10 |
| ARSD2 | 7.23E-45 | 0.51 | 0.41 | 0.10 | 1.68E-40 | CNV_6 | ARSD | 0.10 |
| PIP1 | 0 | 6.17 | 0.74 | 0.06 | 0 | CNV_7 | PIP | 0.06 |
| SLC18B1 | 0 | 2.62 | 0.74 | 0.05 | 0 | CNV_7 | SLC18B1 | 0.06 |
| AGR32 | 0 | 2.48 | 0.70 | 0.01 | 0 | CNV_7 | AGR3 | 0.02 |
| ANKRD30A2 | 0 | 1.94 | 0.90 | 0.07 | 0 | CNV_7 | ANKRD30A | 0.07 |
| LRRC264 | 0 | 1.51 | 0.76 | 0.05 | 0 | CNV_7 | LRRC26 | 0.05 |
| ST8SIA6-AS11 | 0 | 0.83 | 0.55 | 0.02 | 0 | CNV_7 | ST8SIA6-AS1 | 0.02 |
| NAV3 | 0 | 0.75 | 0.41 | 0.02 | 0 | CNV_7 | NAV3 | 0.02 |
| LINC009931 | 0 | 0.73 | 0.55 | 0.02 | 0 | CNV_7 | LINC00993 | 0.03 |
| SIX11 | 0 | 0.72 | 0.51 | 0.02 | 0 | CNV_7 | SIX1 | 0.02 |
| RP11-483P21.2 | 0 | 0.57 | 0.40 | 0.00 | 0 | CNV_7 | RP11-483P21.2 | 0.01 |
| PPIL6 | 0 | 0.52 | 0.42 | 0.02 | 0 | CNV_7 | PPIL6 | 0.02 |
| TFF32 | 6.46E-293 | 2.52 | 0.80 | 0.07 | 1.50E-288 | CNV_7 | TFF3 | 0.07 |
| ALDH3B21 | 2.66E-284 | 1.02 | 0.57 | 0.04 | 6.18E-280 | CNV_7 | ALDH3B2 | 0.04 |
| ESR12 | 1.59E-275 | 1.66 | 0.81 | 0.07 | 3.70E-271 | CNV_7 | ESR1 | 0.08 |
| CLDN34 | 2.69E-275 | 1.74 | 0.82 | 0.08 | 6.25E-271 | CNV_7 | CLDN3 | 0.08 |
| MYB2 | 1.63E-263 | 0.73 | 0.51 | 0.03 | 3.77E-259 | CNV_7 | MYB | 0.03 |
| SPDEF3 | 6.16E-256 | 1.13 | 0.79 | 0.07 | 1.43E-251 | CNV_7 | SPDEF | 0.07 |
| DEGS23 | 1.79E-252 | 1.08 | 0.69 | 0.06 | 4.15E-248 | CNV_7 | DEGS2 | 0.06 |
| C9orf1522 | 2.32E-245 | 0.65 | 0.54 | 0.04 | 5.38E-241 | CNV_7 | C9orf152 | 0.04 |
| ENPP1 | 2.96E-242 | 0.97 | 0.51 | 0.03 | 6.88E-238 | CNV_7 | ENPP1 | 0.04 |
| DNAJC122 | 3.64E-236 | 0.90 | 0.64 | 0.05 | 8.45E-232 | CNV_7 | DNAJC12 | 0.06 |
| FOXA13 | 1.24E-226 | 1.00 | 0.61 | 0.05 | 2.89E-222 | CNV_7 | FOXA1 | 0.05 |
| FAM234B | 3.05E-226 | 0.67 | 0.41 | 0.02 | 7.09E-222 | CNV_7 | FAM234B | 0.02 |
| AK9 | 4.43E-210 | 0.52 | 0.48 | 0.03 | 1.03E-205 | CNV_7 | AK9 | 0.04 |
| BIK2 | 4.86E-208 | 0.92 | 0.60 | 0.05 | 1.13E-203 | CNV_7 | BIK | 0.06 |
| PRR15L3 | 3.84E-200 | 0.47 | 0.48 | 0.03 | 8.93E-196 | CNV_7 | PRR15L | 0.04 |
| PODXL2 | 3.30E-197 | 1.06 | 0.61 | 0.06 | 7.66E-193 | CNV_7 | PODXL2 | 0.06 |
| AR3 | 2.76E-191 | 1.04 | 0.75 | 0.09 | 6.41E-187 | CNV_7 | AR | 0.09 |
| FAM84B3 | 3.62E-190 | 1.09 | 0.71 | 0.08 | 8.40E-186 | CNV_7 | FAM84B | 0.08 |
| GATA3-AS11 | 5.54E-190 | 0.83 | 0.47 | 0.03 | 1.29E-185 | CNV_7 | GATA3-AS1 | 0.04 |
| PRLR3 | 2.02E-187 | 0.71 | 0.66 | 0.07 | 4.69E-183 | CNV_7 | PRLR | 0.07 |
| EPN3 | 2.43E-186 | 0.51 | 0.45 | 0.03 | 5.63E-182 | CNV_7 | EPN3 | 0.04 |
| MAPT2 | 9.11E-177 | 0.63 | 0.50 | 0.04 | 2.12E-172 | CNV_7 | MAPT | 0.04 |
| QRSL12 | 2.33E-175 | 1.50 | 0.69 | 0.09 | 5.41E-171 | CNV_7 | QRSL1 | 0.09 |
| MEX3A | 4.23E-174 | 0.44 | 0.46 | 0.04 | 9.83E-170 | CNV_7 | MEX3A | 0.04 |
| AP1M24 | 9.23E-174 | 0.93 | 0.75 | 0.10 | 2.14E-169 | CNV_7 | AP1M2 | 0.10 |
| TOM1L13 | 1.01E-172 | 0.76 | 0.58 | 0.06 | 2.35E-168 | CNV_7 | TOM1L1 | 0.06 |
| RTN4IP1 | 1.67E-172 | 0.51 | 0.41 | 0.03 | 3.87E-168 | CNV_7 | RTN4IP1 | 0.03 |
| GPR1603 | 8.27E-169 | 0.80 | 0.61 | 0.07 | 1.92E-164 | CNV_7 | GPR160 | 0.07 |
| ARHGAP8 | 1.58E-168 | 0.45 | 0.42 | 0.03 | 3.66E-164 | CNV_7 | ARHGAP8 | 0.03 |
| LURAP1L1 | 1.23E-161 | 1.10 | 0.60 | 0.07 | 2.87E-157 | CNV_7 | LURAP1L | 0.07 |
| SMPD2 | 1.59E-157 | 0.88 | 0.65 | 0.08 | 3.69E-153 | CNV_7 | SMPD2 | 0.08 |
| RP11-53O19.11 | 5.58E-154 | 1.02 | 0.57 | 0.06 | 1.29E-149 | CNV_7 | RP11-53O19.1 | 0.06 |
| PRR151 | 1.89E-144 | 0.45 | 0.45 | 0.04 | 4.38E-140 | CNV_7 | PRR15 | 0.04 |
| MYEF2 | 1.31E-141 | 0.39 | 0.46 | 0.04 | 3.05E-137 | CNV_7 | MYEF2 | 0.05 |
| TTC39A2 | 2.63E-138 | 0.69 | 0.49 | 0.05 | 6.12E-134 | CNV_7 | TTC39A | 0.05 |
| ERBB34 | 2.82E-138 | 0.81 | 0.68 | 0.10 | 6.55E-134 | CNV_7 | ERBB3 | 0.10 |
| GFRA11 | 3.45E-137 | 0.82 | 0.49 | 0.05 | 8.00E-133 | CNV_7 | GFRA1 | 0.05 |
| TMEM2412 | 3.13E-136 | 0.61 | 0.53 | 0.06 | 7.26E-132 | CNV_7 | TMEM241 | 0.06 |
| ZUFSP | 7.07E-136 | 0.51 | 0.49 | 0.05 | 1.64E-131 | CNV_7 | ZUFSP | 0.05 |
| NOVA11 | 4.63E-135 | 1.43 | 0.56 | 0.07 | 1.07E-130 | CNV_7 | NOVA1 | 0.07 |
| MTL5 | 2.63E-132 | 0.51 | 0.47 | 0.05 | 6.11E-128 | CNV_7 | MTL5 | 0.05 |
| CTD-2015H6.33 | 1.07E-131 | 0.71 | 0.59 | 0.08 | 2.49E-127 | CNV_7 | CTD-2015H6.3 | 0.08 |
| FAM110B1 | 1.47E-131 | 0.82 | 0.52 | 0.06 | 3.41E-127 | CNV_7 | FAM110B | 0.06 |
| TRAF3IP2 | 9.15E-131 | 0.93 | 0.58 | 0.08 | 2.12E-126 | CNV_7 | TRAF3IP2 | 0.08 |
| TCTEX1D2 | 2.32E-128 | 0.58 | 0.49 | 0.05 | 5.40E-124 | CNV_7 | TCTEX1D2 | 0.06 |
| C17orf581 | 6.04E-127 | 0.96 | 0.62 | 0.09 | 1.40E-122 | CNV_7 | C17orf58 | 0.09 |
| VTCN14 | 1.59E-126 | 1.36 | 0.58 | 0.08 | 3.68E-122 | CNV_7 | VTCN1 | 0.09 |
| BSPRY2 | 1.74E-120 | 0.38 | 0.41 | 0.04 | 4.05E-116 | CNV_7 | BSPRY | 0.04 |
| SYT72 | 9.06E-120 | 0.51 | 0.46 | 0.05 | 2.10E-115 | CNV_7 | SYT7 | 0.06 |
| C5orf301 | 3.43E-117 | 0.61 | 0.46 | 0.05 | 7.97E-113 | CNV_7 | C5orf30 | 0.05 |
| ST6GALNAC21 | 6.35E-116 | 0.48 | 0.48 | 0.06 | 1.47E-111 | CNV_7 | ST6GALNAC2 | 0.06 |
| KDM1B | 4.03E-114 | 0.47 | 0.48 | 0.06 | 9.36E-110 | CNV_7 | KDM1B | 0.06 |
| TBX33 | 6.06E-112 | 0.68 | 0.62 | 0.10 | 1.41E-107 | CNV_7 | TBX3 | 0.10 |
| H2AFY2 | 1.58E-111 | 0.58 | 0.46 | 0.06 | 3.66E-107 | CNV_7 | H2AFY2 | 0.06 |
| FIG4 | 2.65E-103 | 0.65 | 0.48 | 0.06 | 6.16E-99 | CNV_7 | FIG4 | 0.06 |
| DPCD1 | 9.60E-102 | 0.63 | 0.57 | 0.09 | 2.23E-97 | CNV_7 | DPCD | 0.09 |
| GSTZ12 | 1.63E-101 | 0.61 | 0.59 | 0.10 | 3.78E-97 | CNV_7 | GSTZ1 | 0.10 |
| PEX7 | 3.14E-100 | 0.63 | 0.45 | 0.06 | 7.29E-96 | CNV_7 | PEX7 | 0.06 |
| PRSS85 | 1.14E-98 | 0.54 | 0.57 | 0.09 | 2.66E-94 | CNV_7 | PRSS8 | 0.09 |
| CCDC1701 | 1.21E-98 | 0.47 | 0.41 | 0.05 | 2.81E-94 | CNV_7 | CCDC170 | 0.05 |
| CEP57L1 | 3.17E-98 | 0.49 | 0.45 | 0.06 | 7.35E-94 | CNV_7 | CEP57L1 | 0.06 |
| ERP272 | 5.75E-98 | 0.58 | 0.45 | 0.06 | 1.33E-93 | CNV_7 | ERP27 | 0.06 |
| REEP63 | 3.91E-95 | 0.53 | 0.49 | 0.07 | 9.08E-91 | CNV_7 | REEP6 | 0.07 |
| OCLN1 | 1.03E-93 | 0.34 | 0.42 | 0.05 | 2.40E-89 | CNV_7 | OCLN | 0.05 |
| MARVELD32 | 2.33E-93 | 0.43 | 0.40 | 0.05 | 5.40E-89 | CNV_7 | MARVELD3 | 0.05 |
| KIF13A | 2.42E-93 | 0.56 | 0.46 | 0.07 | 5.62E-89 | CNV_7 | KIF13A | 0.07 |
| EMG11 | 1.46E-91 | 0.63 | 0.52 | 0.08 | 3.39E-87 | CNV_7 | EMG1 | 0.09 |
| HID12 | 8.44E-91 | 0.38 | 0.43 | 0.06 | 1.96E-86 | CNV_7 | HID1 | 0.06 |
| RHPN11 | 1.85E-89 | 0.33 | 0.43 | 0.06 | 4.29E-85 | CNV_7 | RHPN1 | 0.06 |
| HOXC101 | 1.63E-88 | 0.45 | 0.43 | 0.06 | 3.78E-84 | CNV_7 | HOXC10 | 0.06 |
| MT1G2 | 2.15E-87 | 1.35 | 0.51 | 0.09 | 4.98E-83 | CNV_7 | MT1G | 0.09 |
| AFMID2 | 5.02E-86 | 0.89 | 0.49 | 0.08 | 1.17E-81 | CNV_7 | AFMID | 0.08 |
| AFF35 | 8.79E-86 | 0.82 | 0.54 | 0.09 | 2.04E-81 | CNV_7 | AFF3 | 0.09 |
| HIST2H2BE1 | 1.96E-83 | 0.74 | 0.49 | 0.08 | 4.55E-79 | CNV_7 | HIST2H2BE | 0.08 |
| RMND12 | 2.19E-83 | 0.56 | 0.55 | 0.09 | 5.09E-79 | CNV_7 | RMND1 | 0.10 |
| E2F3 | 2.19E-82 | 0.62 | 0.53 | 0.09 | 5.09E-78 | CNV_7 | E2F3 | 0.09 |
| ADCK2 | 4.28E-79 | 0.42 | 0.45 | 0.07 | 9.93E-75 | CNV_7 | ADCK2 | 0.07 |
| CDK19 | 6.54E-76 | 0.53 | 0.52 | 0.09 | 1.52E-71 | CNV_7 | CDK19 | 0.10 |
| BPNT1 | 3.73E-75 | 0.39 | 0.43 | 0.07 | 8.66E-71 | CNV_7 | BPNT1 | 0.07 |
| RASEF3 | 1.28E-74 | 0.40 | 0.40 | 0.06 | 2.97E-70 | CNV_7 | RASEF | 0.06 |
| MED23 | 1.75E-73 | 0.58 | 0.51 | 0.09 | 4.06E-69 | CNV_7 | MED23 | 0.09 |
| TM7SF21 | 4.28E-72 | 0.50 | 0.46 | 0.08 | 9.94E-68 | CNV_7 | TM7SF2 | 0.08 |
| TK11 | 5.12E-71 | 0.55 | 0.43 | 0.07 | 1.19E-66 | CNV_7 | TK1 | 0.07 |
| TSPYL4 | 9.73E-71 | 0.45 | 0.46 | 0.08 | 2.26E-66 | CNV_7 | TSPYL4 | 0.08 |
| SLC37A3 | 1.88E-70 | 0.49 | 0.51 | 0.10 | 4.35E-66 | CNV_7 | SLC37A3 | 0.10 |
| MYCBP | 3.58E-70 | 0.37 | 0.50 | 0.09 | 8.30E-66 | CNV_7 | MYCBP | 0.09 |
| HIST1H4H1 | 4.34E-70 | 0.65 | 0.44 | 0.08 | 1.01E-65 | CNV_7 | HIST1H4H | 0.08 |
| METTL2A | 1.84E-68 | 0.36 | 0.41 | 0.07 | 4.27E-64 | CNV_7 | METTL2A | 0.07 |
| LDLRAD33 | 7.39E-68 | 0.45 | 0.48 | 0.09 | 1.72E-63 | CNV_7 | LDLRAD3 | 0.09 |
| IFT1222 | 7.90E-67 | 0.48 | 0.43 | 0.07 | 1.84E-62 | CNV_7 | IFT122 | 0.08 |
| UBN2 | 1.07E-64 | 0.45 | 0.49 | 0.09 | 2.49E-60 | CNV_7 | UBN2 | 0.10 |
| DPH5 | 2.45E-64 | 0.48 | 0.47 | 0.09 | 5.69E-60 | CNV_7 | DPH5 | 0.09 |
| HIST1H2AE1 | 3.48E-64 | 0.76 | 0.45 | 0.08 | 8.07E-60 | CNV_7 | HIST1H2AE | 0.09 |
| SYNJ2BP | 6.54E-63 | 0.37 | 0.44 | 0.08 | 1.52E-58 | CNV_7 | SYNJ2BP | 0.08 |
| MB4 | 2.37E-62 | 0.44 | 0.42 | 0.07 | 5.51E-58 | CNV_7 | MB | 0.07 |
| CACNB31 | 1.08E-61 | 0.40 | 0.43 | 0.08 | 2.51E-57 | CNV_7 | CACNB3 | 0.08 |
| RP11-295G20.22 | 2.12E-61 | 0.40 | 0.42 | 0.08 | 4.93E-57 | CNV_7 | RP11-295G20.2 | 0.08 |
| SEMA3C3 | 6.91E-61 | 0.43 | 0.45 | 0.08 | 1.60E-56 | CNV_7 | SEMA3C | 0.08 |
| ARSD3 | 8.83E-61 | 0.40 | 0.49 | 0.10 | 2.05E-56 | CNV_7 | ARSD | 0.10 |
| WEE11 | 3.07E-60 | 0.45 | 0.43 | 0.08 | 7.13E-56 | CNV_7 | WEE1 | 0.08 |
| FAM8A1 | 6.09E-60 | 0.37 | 0.45 | 0.08 | 1.41E-55 | CNV_7 | FAM8A1 | 0.09 |
| MIS18A | 1.09E-59 | 0.29 | 0.42 | 0.08 | 2.52E-55 | CNV_7 | MIS18A | 0.08 |
| GNPNAT1 | 1.50E-59 | 0.39 | 0.48 | 0.09 | 3.49E-55 | CNV_7 | GNPNAT1 | 0.10 |
| SMIM224 | 7.50E-58 | 0.81 | 0.45 | 0.09 | 1.74E-53 | CNV_7 | SMIM22 | 0.09 |
| F122 | 1.35E-57 | 0.41 | 0.40 | 0.07 | 3.15E-53 | CNV_7 | F12 | 0.08 |
| ESRP16 | 1.54E-57 | 0.52 | 0.46 | 0.09 | 3.58E-53 | CNV_7 | ESRP1 | 0.10 |
| F11R1 | 6.79E-57 | 0.44 | 0.45 | 0.09 | 1.58E-52 | CNV_7 | F11R | 0.09 |
| C1orf561 | 1.10E-54 | 1.07 | 0.41 | 0.08 | 2.55E-50 | CNV_7 | C1orf56 | 0.08 |
| ABCD32 | 1.79E-53 | 0.39 | 0.46 | 0.10 | 4.17E-49 | CNV_7 | ABCD3 | 0.10 |
| UBE2T2 | 7.42E-53 | 0.58 | 0.41 | 0.08 | 1.72E-48 | CNV_7 | UBE2T | 0.08 |
| NVL | 1.31E-49 | 0.29 | 0.42 | 0.08 | 3.03E-45 | CNV_7 | NVL | 0.09 |
| GALNT73 | 6.61E-49 | 0.27 | 0.42 | 0.08 | 1.53E-44 | CNV_7 | GALNT7 | 0.09 |
| SESN1 | 7.66E-49 | 0.27 | 0.44 | 0.09 | 1.78E-44 | CNV_7 | SESN1 | 0.09 |
| PKP35 | 4.05E-48 | 0.26 | 0.42 | 0.09 | 9.39E-44 | CNV_7 | PKP3 | 0.09 |
| INADL3 | 4.82E-46 | 0.36 | 0.44 | 0.10 | 1.12E-41 | CNV_7 | INADL | 0.10 |
| TBC1D163 | 6.61E-45 | 0.27 | 0.42 | 0.09 | 1.53E-40 | CNV_7 | TBC1D16 | 0.09 |
| CENPW2 | 2.03E-44 | 0.50 | 0.42 | 0.09 | 4.72E-40 | CNV_7 | CENPW | 0.10 |
| LRIG13 | 2.62E-43 | 0.32 | 0.43 | 0.10 | 6.07E-39 | CNV_7 | LRIG1 | 0.10 |
| GADD45G3 | 1.25E-42 | 0.39 | 0.40 | 0.09 | 2.90E-38 | CNV_7 | GADD45G | 0.09 |
| DUSP14 | 1.70E-42 | 0.40 | 0.40 | 0.09 | 3.94E-38 | CNV_7 | DUSP14 | 0.09 |
| CASP141 | 0 | 3.48 | 0.58 | 0.01 | 0 | CNV_8 | CASP14 | 0.02 |
| RP11-206M11.71 | 0 | 2.01 | 0.45 | 0.01 | 0 | CNV_8 | RP11-206M11.7 | 0.02 |
| SCGB1B2P | 4.48E-213 | 3.37 | 0.43 | 0.02 | 1.04E-208 | CNV_8 | SCGB1B2P | 0.02 |
| STEAP4 | 3.61E-137 | 2.01 | 0.44 | 0.04 | 8.39E-133 | CNV_8 | STEAP4 | 0.04 |
| PIP2 | 2.37E-114 | 3.88 | 0.51 | 0.06 | 5.50E-110 | CNV_8 | PIP | 0.06 |
| GGT11 | 2.66E-111 | 1.70 | 0.45 | 0.05 | 6.18E-107 | CNV_8 | GGT1 | 0.05 |
| CYP51A1 | 7.90E-67 | 2.05 | 0.50 | 0.10 | 1.83E-62 | CNV_8 | CYP51A1 | 0.10 |
| S100A81 | 3.90E-58 | 1.26 | 0.45 | 0.08 | 9.06E-54 | CNV_8 | S100A8 | 0.08 |
| ESRP17 | 1.10E-44 | 1.42 | 0.42 | 0.09 | 2.55E-40 | CNV_8 | ESRP1 | 0.10 |
| FABP4 | 0 | 4.53 | 0.41 | 0.02 | 0 | Endothelial_cells | FABP4 | 0.04 |
| PLVAP | 0 | 4.18 | 0.88 | 0.01 | 0 | Endothelial_cells | PLVAP | 0.04 |
| RAMP2 | 0 | 3.99 | 0.94 | 0.05 | 0 | Endothelial_cells | RAMP2 | 0.08 |
| VWF | 0 | 3.83 | 0.88 | 0.01 | 0 | Endothelial_cells | VWF | 0.04 |
| ACKR1 | 0 | 3.80 | 0.51 | 0.01 | 0 | Endothelial_cells | ACKR1 | 0.02 |
| AQP1 | 0 | 3.80 | 0.85 | 0.03 | 0 | Endothelial_cells | AQP1 | 0.06 |
| ID1 | 0 | 3.51 | 0.83 | 0.07 | 0 | Endothelial_cells | ID1 | 0.09 |
| EGFL7 | 0 | 3.47 | 0.93 | 0.04 | 0 | Endothelial_cells | EGFL7 | 0.07 |
| CLDN5 | 0 | 3.17 | 0.73 | 0.00 | 0 | Endothelial_cells | CLDN5 | 0.03 |
| COL4A1 | 0 | 3.10 | 0.72 | 0.07 | 0 | Endothelial_cells | COL4A1 | 0.09 |
| CD34 | 0 | 3.00 | 0.88 | 0.02 | 0 | Endothelial_cells | CD34 | 0.05 |
| CLEC14A | 0 | 2.85 | 0.88 | 0.00 | 0 | Endothelial_cells | CLEC14A | 0.03 |
| EMCN | 0 | 2.80 | 0.85 | 0.01 | 0 | Endothelial_cells | EMCN | 0.03 |
| ADGRL4 | 0 | 2.78 | 0.89 | 0.00 | 0 | Endothelial_cells | ADGRL4 | 0.03 |
| RAMP3 | 0 | 2.70 | 0.77 | 0.01 | 0 | Endothelial_cells | RAMP3 | 0.03 |
| ESAM | 0 | 2.65 | 0.86 | 0.02 | 0 | Endothelial_cells | ESAM | 0.05 |
| RBP71 | 0 | 2.51 | 0.60 | 0.08 | 0 | Endothelial_cells | RBP7 | 0.10 |
| PODXL | 0 | 2.49 | 0.67 | 0.03 | 0 | Endothelial_cells | PODXL | 0.05 |
| CALCRL | 0 | 2.49 | 0.74 | 0.02 | 0 | Endothelial_cells | CALCRL | 0.05 |
| CD931 | 0 | 2.37 | 0.80 | 0.04 | 0 | Endothelial_cells | CD93 | 0.07 |
| CDH5 | 0 | 2.35 | 0.79 | 0.00 | 0 | Endothelial_cells | CDH5 | 0.03 |
| FLT1 | 0 | 2.24 | 0.69 | 0.02 | 0 | Endothelial_cells | FLT1 | 0.04 |
| CYYR11 | 0 | 2.12 | 0.78 | 0.05 | 0 | Endothelial_cells | CYYR1 | 0.08 |
| SOX18 | 0 | 2.08 | 0.72 | 0.00 | 0 | Endothelial_cells | SOX18 | 0.03 |
| PALMD | 0 | 2.07 | 0.75 | 0.04 | 0 | Endothelial_cells | PALMD | 0.06 |
| IL33 | 0 | 2.06 | 0.55 | 0.02 | 0 | Endothelial_cells | IL33 | 0.04 |
| CXorf36 | 0 | 1.98 | 0.72 | 0.00 | 0 | Endothelial_cells | CXorf36 | 0.03 |
| PTPRB | 0 | 1.95 | 0.69 | 0.00 | 0 | Endothelial_cells | PTPRB | 0.03 |
| MMRN2 | 0 | 1.91 | 0.74 | 0.01 | 0 | Endothelial_cells | MMRN2 | 0.03 |
| TIE1 | 0 | 1.84 | 0.70 | 0.00 | 0 | Endothelial_cells | TIE1 | 0.03 |
| ADGRF5 | 0 | 1.83 | 0.63 | 0.02 | 0 | Endothelial_cells | ADGRF5 | 0.04 |
| APLNR | 0 | 1.79 | 0.49 | 0.00 | 0 | Endothelial_cells | APLNR | 0.02 |
| KDR | 0 | 1.79 | 0.58 | 0.01 | 0 | Endothelial_cells | KDR | 0.03 |
| ADCY4 | 0 | 1.79 | 0.72 | 0.02 | 0 | Endothelial_cells | ADCY4 | 0.04 |
| SLCO2A1 | 0 | 1.74 | 0.50 | 0.01 | 0 | Endothelial_cells | SLCO2A1 | 0.02 |
| TM4SF181 | 0 | 1.73 | 0.62 | 0.02 | 0 | Endothelial_cells | TM4SF18 | 0.05 |
| INSR1 | 0 | 1.72 | 0.41 | 0.08 | 0 | Endothelial_cells | INSR | 0.09 |
| NOTCH4 | 0 | 1.72 | 0.59 | 0.02 | 0 | Endothelial_cells | NOTCH4 | 0.04 |
| VWA11 | 0 | 1.69 | 0.62 | 0.08 | 0 | Endothelial_cells | VWA1 | 0.10 |
| FZD4 | 0 | 1.69 | 0.69 | 0.03 | 0 | Endothelial_cells | FZD4 | 0.06 |
| LDB2 | 0 | 1.68 | 0.70 | 0.04 | 0 | Endothelial_cells | LDB2 | 0.06 |
| SNCG1 | 0 | 1.66 | 0.60 | 0.03 | 0 | Endothelial_cells | SNCG | 0.05 |
| MCTP1 | 0 | 1.65 | 0.59 | 0.04 | 0 | Endothelial_cells | MCTP1 | 0.05 |
| ROBO4 | 0 | 1.64 | 0.65 | 0.00 | 0 | Endothelial_cells | ROBO4 | 0.03 |
| TSPAN7 | 0 | 1.63 | 0.54 | 0.01 | 0 | Endothelial_cells | TSPAN7 | 0.03 |
| MCAM | 0 | 1.62 | 0.55 | 0.05 | 0 | Endothelial_cells | MCAM | 0.07 |
| LIFR | 0 | 1.62 | 0.49 | 0.04 | 0 | Endothelial_cells | LIFR | 0.05 |
| JAM2 | 0 | 1.61 | 0.64 | 0.03 | 0 | Endothelial_cells | JAM2 | 0.05 |
| SDPR1 | 0 | 1.58 | 0.53 | 0.01 | 0 | Endothelial_cells | SDPR | 0.03 |
| SMAD11 | 0 | 1.49 | 0.61 | 0.06 | 0 | Endothelial_cells | SMAD1 | 0.08 |
| LIMS21 | 0 | 1.47 | 0.66 | 0.07 | 0 | Endothelial_cells | LIMS2 | 0.09 |
| PCDH17 | 0 | 1.45 | 0.41 | 0.00 | 0 | Endothelial_cells | PCDH17 | 0.02 |
| NRN11 | 0 | 1.44 | 0.58 | 0.06 | 0 | Endothelial_cells | NRN1 | 0.08 |
| ZNF385D | 0 | 1.44 | 0.47 | 0.02 | 0 | Endothelial_cells | ZNF385D | 0.03 |
| CCL14 | 0 | 1.43 | 0.43 | 0.00 | 0 | Endothelial_cells | CCL14 | 0.02 |
| S1PR11 | 0 | 1.41 | 0.69 | 0.07 | 0 | Endothelial_cells | S1PR1 | 0.09 |
| ERG | 0 | 1.41 | 0.62 | 0.01 | 0 | Endothelial_cells | ERG | 0.03 |
| RAPGEF3 | 0 | 1.39 | 0.60 | 0.01 | 0 | Endothelial_cells | RAPGEF3 | 0.03 |
| SOX17 | 0 | 1.37 | 0.47 | 0.00 | 0 | Endothelial_cells | SOX17 | 0.02 |
| SHANK3 | 0 | 1.35 | 0.52 | 0.01 | 0 | Endothelial_cells | SHANK3 | 0.03 |
| ARHGEF15 | 0 | 1.35 | 0.59 | 0.00 | 0 | Endothelial_cells | ARHGEF15 | 0.02 |
| GPR146 | 0 | 1.34 | 0.52 | 0.02 | 0 | Endothelial_cells | GPR146 | 0.04 |
| NOSTRIN2 | 0 | 1.34 | 0.58 | 0.03 | 0 | Endothelial_cells | NOSTRIN | 0.05 |
| THBD | 0 | 1.33 | 0.52 | 0.03 | 0 | Endothelial_cells | THBD | 0.05 |
| TINAGL11 | 0 | 1.33 | 0.59 | 0.06 | 0 | Endothelial_cells | TINAGL1 | 0.08 |
| TMEM255B1 | 0 | 1.31 | 0.59 | 0.03 | 0 | Endothelial_cells | TMEM255B | 0.05 |
| FAM167B | 0 | 1.31 | 0.46 | 0.02 | 0 | Endothelial_cells | FAM167B | 0.04 |
| PREX2 | 0 | 1.30 | 0.55 | 0.01 | 0 | Endothelial_cells | PREX2 | 0.03 |
| TGM2 | 0 | 1.28 | 0.46 | 0.05 | 0 | Endothelial_cells | TGM2 | 0.07 |
| MYCT1 | 0 | 1.28 | 0.61 | 0.00 | 0 | Endothelial_cells | MYCT1 | 0.02 |
| JAG2 | 0 | 1.28 | 0.45 | 0.02 | 0 | Endothelial_cells | JAG2 | 0.04 |
| IL3RA1 | 0 | 1.27 | 0.55 | 0.01 | 0 | Endothelial_cells | IL3RA | 0.03 |
| ACVRL1 | 0 | 1.27 | 0.57 | 0.04 | 0 | Endothelial_cells | ACVRL1 | 0.06 |
| DLL4 | 0 | 1.26 | 0.45 | 0.00 | 0 | Endothelial_cells | DLL4 | 0.02 |
| DOCK9 | 0 | 1.25 | 0.59 | 0.06 | 0 | Endothelial_cells | DOCK9 | 0.07 |
| KIAA14621 | 0 | 1.22 | 0.53 | 0.05 | 0 | Endothelial_cells | KIAA1462 | 0.06 |
| NES | 0 | 1.21 | 0.46 | 0.04 | 0 | Endothelial_cells | NES | 0.06 |
| PTPRM | 0 | 1.21 | 0.58 | 0.07 | 0 | Endothelial_cells | PTPRM | 0.08 |
| TFPI | 0 | 1.20 | 0.44 | 0.06 | 0 | Endothelial_cells | TFPI | 0.07 |
| IGFBP2 | 0 | 1.17 | 0.44 | 0.06 | 0 | Endothelial_cells | IGFBP2 | 0.07 |
| OLFM1 | 0 | 1.16 | 0.41 | 0.03 | 0 | Endothelial_cells | OLFM1 | 0.05 |
| LAMA51 | 0 | 1.16 | 0.53 | 0.07 | 0 | Endothelial_cells | LAMA5 | 0.09 |
| TMEM88 | 0 | 1.16 | 0.44 | 0.00 | 0 | Endothelial_cells | TMEM88 | 0.02 |
| CFI | 0 | 1.15 | 0.50 | 0.03 | 0 | Endothelial_cells | CFI | 0.04 |
| KANK3 | 0 | 1.15 | 0.50 | 0.01 | 0 | Endothelial_cells | KANK3 | 0.02 |
| HOXD9 | 0 | 1.14 | 0.47 | 0.01 | 0 | Endothelial_cells | HOXD9 | 0.02 |
| SYNPO1 | 0 | 1.13 | 0.45 | 0.05 | 0 | Endothelial_cells | SYNPO | 0.06 |
| MECOM | 0 | 1.13 | 0.42 | 0.01 | 0 | Endothelial_cells | MECOM | 0.02 |
| RASA4 | 0 | 1.11 | 0.46 | 0.06 | 0 | Endothelial_cells | RASA4 | 0.07 |
| THSD7A | 0 | 1.11 | 0.45 | 0.00 | 0 | Endothelial_cells | THSD7A | 0.02 |
| C1orf54 | 0 | 1.10 | 0.52 | 0.07 | 0 | Endothelial_cells | C1orf54 | 0.09 |
| RPS6KA2 | 0 | 1.09 | 0.54 | 0.06 | 0 | Endothelial_cells | RPS6KA2 | 0.08 |
| SCARF1 | 0 | 1.07 | 0.50 | 0.02 | 0 | Endothelial_cells | SCARF1 | 0.04 |
| DYSF | 0 | 1.07 | 0.43 | 0.03 | 0 | Endothelial_cells | DYSF | 0.04 |
| BCL6B | 0 | 1.05 | 0.42 | 0.00 | 0 | Endothelial_cells | BCL6B | 0.02 |
| MCF2L | 0 | 1.05 | 0.47 | 0.03 | 0 | Endothelial_cells | MCF2L | 0.05 |
| CRYBG3 | 0 | 1.04 | 0.50 | 0.07 | 0 | Endothelial_cells | CRYBG3 | 0.08 |
| ANKRD29 | 0 | 1.02 | 0.42 | 0.02 | 0 | Endothelial_cells | ANKRD29 | 0.03 |
| GIMAP8 | 0 | 1.01 | 0.52 | 0.05 | 0 | Endothelial_cells | GIMAP8 | 0.07 |
| CRIM11 | 0 | 1.01 | 0.50 | 0.08 | 0 | Endothelial_cells | CRIM1 | 0.10 |
| PDE2A | 0 | 1.01 | 0.45 | 0.00 | 0 | Endothelial_cells | PDE2A | 0.02 |
| DOCK6 | 0 | 1.01 | 0.43 | 0.04 | 0 | Endothelial_cells | DOCK6 | 0.05 |
| RASIP11 | 0 | 1.00 | 0.50 | 0.03 | 0 | Endothelial_cells | RASIP1 | 0.05 |
| HSPA12B | 0 | 0.99 | 0.47 | 0.03 | 0 | Endothelial_cells | HSPA12B | 0.04 |
| NUAK11 | 0 | 0.97 | 0.48 | 0.06 | 0 | Endothelial_cells | NUAK1 | 0.07 |
| PTPRG1 | 0 | 0.97 | 0.41 | 0.06 | 0 | Endothelial_cells | PTPRG | 0.07 |
| PCAT19 | 0 | 0.96 | 0.42 | 0.00 | 0 | Endothelial_cells | PCAT19 | 0.02 |
| GRB10 | 0 | 0.95 | 0.40 | 0.04 | 0 | Endothelial_cells | GRB10 | 0.05 |
| AOC3 | 0 | 0.94 | 0.43 | 0.01 | 0 | Endothelial_cells | AOC3 | 0.03 |
| ITGB42 | 0 | 0.94 | 0.47 | 0.09 | 0 | Endothelial_cells | ITGB4 | 0.10 |
| AFAP1L1 | 0 | 0.94 | 0.41 | 0.01 | 0 | Endothelial_cells | AFAP1L1 | 0.02 |
| SOCS21 | 0 | 0.94 | 0.51 | 0.05 | 0 | Endothelial_cells | SOCS2 | 0.07 |
| DCHS11 | 0 | 0.93 | 0.44 | 0.04 | 0 | Endothelial_cells | DCHS1 | 0.06 |
| NOTCH1 | 0 | 0.93 | 0.45 | 0.08 | 0 | Endothelial_cells | NOTCH1 | 0.09 |
| GALNT18 | 0 | 0.92 | 0.46 | 0.04 | 0 | Endothelial_cells | GALNT18 | 0.06 |
| TEK | 0 | 0.92 | 0.45 | 0.00 | 0 | Endothelial_cells | TEK | 0.02 |
| ECSCR.1 | 0 | 0.92 | 0.41 | 0.00 | 0 | Endothelial_cells | ECSCR.1 | 0.02 |
| RALGAPA2 | 0 | 0.91 | 0.44 | 0.06 | 0 | Endothelial_cells | RALGAPA2 | 0.07 |
| TGFBR3 | 0 | 0.91 | 0.47 | 0.08 | 0 | Endothelial_cells | TGFBR3 | 0.10 |
| ARHGAP31 | 0 | 0.90 | 0.50 | 0.07 | 0 | Endothelial_cells | ARHGAP31 | 0.09 |
| GPRC5B2 | 0 | 0.89 | 0.44 | 0.08 | 0 | Endothelial_cells | GPRC5B | 0.09 |
| STAB1 | 0 | 0.88 | 0.46 | 0.05 | 0 | Endothelial_cells | STAB1 | 0.06 |
| MAGI12 | 0 | 0.88 | 0.44 | 0.06 | 0 | Endothelial_cells | MAGI1 | 0.07 |
| SHROOM4 | 0 | 0.88 | 0.42 | 0.02 | 0 | Endothelial_cells | SHROOM4 | 0.03 |
| LMO2 | 0 | 0.87 | 0.40 | 0.03 | 0 | Endothelial_cells | LMO2 | 0.04 |
| SH2D3C1 | 0 | 0.87 | 0.54 | 0.08 | 0 | Endothelial_cells | SH2D3C | 0.09 |
| RHOJ | 0 | 0.86 | 0.43 | 0.02 | 0 | Endothelial_cells | RHOJ | 0.04 |
| SASH11 | 0 | 0.82 | 0.44 | 0.07 | 0 | Endothelial_cells | SASH1 | 0.08 |
| FGD5 | 0 | 0.82 | 0.44 | 0.02 | 0 | Endothelial_cells | FGD5 | 0.03 |
| CLIC2 | 0 | 0.82 | 0.43 | 0.05 | 0 | Endothelial_cells | CLIC2 | 0.06 |
| ARAP3 | 0 | 0.82 | 0.41 | 0.02 | 0 | Endothelial_cells | ARAP3 | 0.03 |
| PLCB1 | 0 | 0.81 | 0.41 | 0.03 | 0 | Endothelial_cells | PLCB1 | 0.04 |
| DLC12 | 0 | 0.81 | 0.45 | 0.08 | 0 | Endothelial_cells | DLC1 | 0.10 |
| RBMS21 | 0 | 0.80 | 0.46 | 0.09 | 0 | Endothelial_cells | RBMS2 | 0.10 |
| EPHB41 | 0 | 0.79 | 0.42 | 0.08 | 0 | Endothelial_cells | EPHB4 | 0.09 |
| TSPAN153 | 0 | 0.79 | 0.43 | 0.08 | 0 | Endothelial_cells | TSPAN15 | 0.09 |
| C4orf321 | 0 | 0.77 | 0.40 | 0.05 | 0 | Endothelial_cells | C4orf32 | 0.06 |
| IPO11 | 0 | 0.77 | 0.41 | 0.05 | 0 | Endothelial_cells | IPO11 | 0.06 |
| GFOD1 | 0 | 0.73 | 0.42 | 0.07 | 0 | Endothelial_cells | GFOD1 | 0.08 |
| CNRIP11 | 0 | 0.64 | 0.44 | 0.06 | 0 | Endothelial_cells | CNRIP1 | 0.08 |
| RASAL21 | 1.72E-278 | 0.74 | 0.41 | 0.08 | 4.00E-274 | Endothelial_cells | RASAL2 | 0.09 |
| INPP1 | 3.71E-256 | 0.65 | 0.41 | 0.09 | 8.61E-252 | Endothelial_cells | INPP1 | 0.10 |
| MFAP41 | 0 | 3.76 | 0.96 | 0.06 | 0 | Fibroblasts | MFAP4 | 0.08 |
| IGF1 | 0 | 2.89 | 0.82 | 0.04 | 0 | Fibroblasts | IGF1 | 0.06 |
| ADH1B | 0 | 2.73 | 0.44 | 0.00 | 0 | Fibroblasts | ADH1B | 0.01 |
| SRPX1 | 0 | 2.69 | 0.85 | 0.06 | 0 | Fibroblasts | SRPX | 0.07 |
| IGFBP61 | 0 | 2.68 | 0.68 | 0.08 | 0 | Fibroblasts | IGFBP6 | 0.09 |
| DPT1 | 0 | 2.68 | 0.75 | 0.05 | 0 | Fibroblasts | DPT | 0.07 |
| COL14A11 | 0 | 2.48 | 0.70 | 0.06 | 0 | Fibroblasts | COL14A1 | 0.08 |
| NR2F1 | 0 | 2.43 | 0.74 | 0.03 | 0 | Fibroblasts | NR2F1 | 0.05 |
| LAMA21 | 0 | 2.13 | 0.78 | 0.04 | 0 | Fibroblasts | LAMA2 | 0.06 |
| CD2481 | 0 | 2.04 | 0.80 | 0.06 | 0 | Fibroblasts | CD248 | 0.08 |
| FGF71 | 0 | 1.98 | 0.67 | 0.05 | 0 | Fibroblasts | FGF7 | 0.07 |
| PLAC91 | 0 | 1.94 | 0.73 | 0.08 | 0 | Fibroblasts | PLAC9 | 0.10 |
| CFH2 | 0 | 1.91 | 0.70 | 0.09 | 0 | Fibroblasts | CFH | 0.10 |
| MEG31 | 0 | 1.87 | 0.74 | 0.07 | 0 | Fibroblasts | MEG3 | 0.08 |
| AADACL2-AS1 | 0 | 1.85 | 0.59 | 0.02 | 0 | Fibroblasts | AADACL2-AS1 | 0.03 |
| PDGFRA1 | 0 | 1.83 | 0.77 | 0.08 | 0 | Fibroblasts | PDGFRA | 0.10 |
| HSPB61 | 0 | 1.78 | 0.59 | 0.05 | 0 | Fibroblasts | HSPB6 | 0.06 |
| RGMA2 | 0 | 1.75 | 0.66 | 0.08 | 0 | Fibroblasts | RGMA | 0.09 |
| PODN1 | 0 | 1.73 | 0.66 | 0.06 | 0 | Fibroblasts | PODN | 0.08 |
| TFPI1 | 0 | 1.72 | 0.75 | 0.05 | 0 | Fibroblasts | TFPI | 0.07 |
| RASD13 | 0 | 1.71 | 0.53 | 0.07 | 0 | Fibroblasts | RASD1 | 0.08 |
| ABCA8 | 0 | 1.70 | 0.57 | 0.01 | 0 | Fibroblasts | ABCA8 | 0.02 |
| SMOC21 | 0 | 1.70 | 0.67 | 0.08 | 0 | Fibroblasts | SMOC2 | 0.10 |
| SLIT31 | 0 | 1.69 | 0.66 | 0.07 | 0 | Fibroblasts | SLIT3 | 0.08 |
| ELN2 | 0 | 1.69 | 0.49 | 0.06 | 0 | Fibroblasts | ELN | 0.07 |
| TNXB1 | 0 | 1.68 | 0.53 | 0.02 | 0 | Fibroblasts | TNXB | 0.03 |
| PLXDC11 | 0 | 1.63 | 0.68 | 0.07 | 0 | Fibroblasts | PLXDC1 | 0.09 |
| ABCA6 | 0 | 1.63 | 0.60 | 0.02 | 0 | Fibroblasts | ABCA6 | 0.04 |
| ALDH1A11 | 0 | 1.59 | 0.58 | 0.03 | 0 | Fibroblasts | ALDH1A1 | 0.05 |
| GGT52 | 0 | 1.56 | 0.64 | 0.07 | 0 | Fibroblasts | GGT5 | 0.08 |
| SVEP1 | 0 | 1.56 | 0.49 | 0.03 | 0 | Fibroblasts | SVEP1 | 0.04 |
| GPC3 | 0 | 1.54 | 0.46 | 0.01 | 0 | Fibroblasts | GPC3 | 0.02 |
| RUNX1T11 | 0 | 1.51 | 0.65 | 0.05 | 0 | Fibroblasts | RUNX1T1 | 0.06 |
| CPXM11 | 0 | 1.51 | 0.52 | 0.05 | 0 | Fibroblasts | CPXM1 | 0.07 |
| PCDH18 | 0 | 1.50 | 0.64 | 0.04 | 0 | Fibroblasts | PCDH18 | 0.05 |
| MIR99AHG1 | 0 | 1.50 | 0.60 | 0.05 | 0 | Fibroblasts | MIR99AHG | 0.06 |
| OGN1 | 0 | 1.47 | 0.46 | 0.04 | 0 | Fibroblasts | OGN | 0.04 |
| BOC1 | 0 | 1.47 | 0.66 | 0.07 | 0 | Fibroblasts | BOC | 0.09 |
| VCAM11 | 0 | 1.47 | 0.54 | 0.06 | 0 | Fibroblasts | VCAM1 | 0.07 |
| FAM20A1 | 0 | 1.46 | 0.61 | 0.06 | 0 | Fibroblasts | FAM20A | 0.07 |
| RNASE42 | 0 | 1.45 | 0.65 | 0.08 | 0 | Fibroblasts | RNASE4 | 0.10 |
| PDGFD | 0 | 1.45 | 0.57 | 0.03 | 0 | Fibroblasts | PDGFD | 0.04 |
| EMILIN11 | 0 | 1.41 | 0.66 | 0.09 | 0 | Fibroblasts | EMILIN1 | 0.10 |
| CRISPLD21 | 0 | 1.39 | 0.63 | 0.08 | 0 | Fibroblasts | CRISPLD2 | 0.09 |
| ABI3BP | 0 | 1.32 | 0.51 | 0.02 | 0 | Fibroblasts | ABI3BP | 0.03 |
| NDN | 0 | 1.30 | 0.60 | 0.05 | 0 | Fibroblasts | NDN | 0.06 |
| SCARA5 | 0 | 1.30 | 0.44 | 0.00 | 0 | Fibroblasts | SCARA5 | 0.01 |
| AKAP121 | 0 | 1.29 | 0.58 | 0.05 | 0 | Fibroblasts | AKAP12 | 0.06 |
| ADGRA21 | 0 | 1.23 | 0.57 | 0.05 | 0 | Fibroblasts | ADGRA2 | 0.06 |
| ABCA10 | 0 | 1.22 | 0.43 | 0.01 | 0 | Fibroblasts | ABCA10 | 0.02 |
| TGFBR31 | 0 | 1.19 | 0.58 | 0.08 | 0 | Fibroblasts | TGFBR3 | 0.10 |
| DCLK11 | 0 | 1.16 | 0.54 | 0.06 | 0 | Fibroblasts | DCLK1 | 0.07 |
| PLEKHH2 | 0 | 1.14 | 0.47 | 0.04 | 0 | Fibroblasts | PLEKHH2 | 0.05 |
| CHRDL1 | 0 | 1.14 | 0.41 | 0.01 | 0 | Fibroblasts | CHRDL1 | 0.02 |
| OAF1 | 0 | 1.10 | 0.54 | 0.06 | 0 | Fibroblasts | OAF | 0.07 |
| OSR1 | 0 | 1.05 | 0.43 | 0.02 | 0 | Fibroblasts | OSR1 | 0.03 |
| EGFR1 | 0 | 1.05 | 0.53 | 0.08 | 0 | Fibroblasts | EGFR | 0.09 |
| GAS71 | 0 | 1.04 | 0.51 | 0.08 | 0 | Fibroblasts | GAS7 | 0.09 |
| TMEM1191 | 0 | 1.04 | 0.48 | 0.06 | 0 | Fibroblasts | TMEM119 | 0.06 |
| GALNT16 | 0 | 1.03 | 0.44 | 0.01 | 0 | Fibroblasts | GALNT16 | 0.02 |
| PLSCR42 | 0 | 1.02 | 0.54 | 0.07 | 0 | Fibroblasts | PLSCR4 | 0.08 |
| MEIS22 | 0 | 1.00 | 0.53 | 0.07 | 0 | Fibroblasts | MEIS2 | 0.08 |
| PTGES | 0 | 0.99 | 0.50 | 0.07 | 0 | Fibroblasts | PTGES | 0.08 |
| RBMS32 | 0 | 0.98 | 0.51 | 0.06 | 0 | Fibroblasts | RBMS3 | 0.07 |
| GLT8D21 | 0 | 0.98 | 0.56 | 0.07 | 0 | Fibroblasts | GLT8D2 | 0.08 |
| FMO1 | 0 | 0.98 | 0.41 | 0.02 | 0 | Fibroblasts | FMO1 | 0.03 |
| VASN1 | 0 | 0.97 | 0.43 | 0.06 | 0 | Fibroblasts | VASN | 0.07 |
| LRRN4CL | 0 | 0.96 | 0.45 | 0.01 | 0 | Fibroblasts | LRRN4CL | 0.02 |
| CDKN1C2 | 0 | 0.95 | 0.46 | 0.07 | 0 | Fibroblasts | CDKN1C | 0.08 |
| EDNRB | 0 | 0.94 | 0.40 | 0.02 | 0 | Fibroblasts | EDNRB | 0.03 |
| GSTM5 | 0 | 0.94 | 0.44 | 0.01 | 0 | Fibroblasts | GSTM5 | 0.02 |
| ZFHX41 | 0 | 0.93 | 0.48 | 0.05 | 0 | Fibroblasts | ZFHX4 | 0.06 |
| LDB21 | 0 | 0.92 | 0.49 | 0.05 | 0 | Fibroblasts | LDB2 | 0.06 |
| IL331 | 0 | 0.91 | 0.42 | 0.03 | 0 | Fibroblasts | IL33 | 0.04 |
| SLIT2 | 0 | 0.90 | 0.42 | 0.03 | 0 | Fibroblasts | SLIT2 | 0.03 |
| TWIST21 | 0 | 0.88 | 0.43 | 0.03 | 0 | Fibroblasts | TWIST2 | 0.04 |
| OLFML1 | 0 | 0.87 | 0.45 | 0.03 | 0 | Fibroblasts | OLFML1 | 0.04 |
| SMPDL3A | 0 | 0.87 | 0.43 | 0.05 | 0 | Fibroblasts | SMPDL3A | 0.06 |
| NR2F1-AS1 | 0 | 0.87 | 0.40 | 0.03 | 0 | Fibroblasts | NR2F1-AS1 | 0.04 |
| NT5E2 | 0 | 0.85 | 0.48 | 0.08 | 0 | Fibroblasts | NT5E | 0.09 |
| LPAR1 | 0 | 0.80 | 0.43 | 0.03 | 0 | Fibroblasts | LPAR1 | 0.04 |
| CLMP1 | 0 | 0.79 | 0.45 | 0.06 | 0 | Fibroblasts | CLMP | 0.07 |
| CLIP31 | 0 | 0.76 | 0.42 | 0.05 | 0 | Fibroblasts | CLIP3 | 0.06 |
| CD341 | 0 | 0.69 | 0.45 | 0.04 | 0 | Fibroblasts | CD34 | 0.05 |
| SERPINE21 | 1.18E-307 | 1.18 | 0.51 | 0.09 | 2.73E-303 | Fibroblasts | SERPINE2 | 0.10 |
| EBF11 | 2.75E-307 | 0.81 | 0.40 | 0.05 | 6.40E-303 | Fibroblasts | EBF1 | 0.06 |
| ANGPTL22 | 1.57E-304 | 0.91 | 0.49 | 0.08 | 3.63E-300 | Fibroblasts | ANGPTL2 | 0.09 |
| DNM11 | 5.75E-302 | 0.85 | 0.41 | 0.06 | 1.34E-297 | Fibroblasts | DNM1 | 0.07 |
| CYP1B11 | 1.42E-298 | 1.40 | 0.46 | 0.07 | 3.30E-294 | Fibroblasts | CYP1B1 | 0.08 |
| MT1M1 | 7.89E-295 | 0.84 | 0.45 | 0.07 | 1.83E-290 | Fibroblasts | MT1M | 0.08 |
| ZCCHC241 | 4.22E-291 | 0.83 | 0.44 | 0.07 | 9.79E-287 | Fibroblasts | ZCCHC24 | 0.08 |
| CNRIP12 | 4.62E-291 | 0.70 | 0.44 | 0.07 | 1.07E-286 | Fibroblasts | CNRIP1 | 0.08 |
| FBLN7 | 2.43E-285 | 0.83 | 0.51 | 0.09 | 5.64E-281 | Fibroblasts | FBLN7 | 0.10 |
| MAP1A2 | 3.11E-284 | 0.69 | 0.41 | 0.06 | 7.23E-280 | Fibroblasts | MAP1A | 0.07 |
| CRYBG31 | 1.48E-279 | 0.81 | 0.45 | 0.08 | 3.43E-275 | Fibroblasts | CRYBG3 | 0.08 |
| CD302 | 7.71E-276 | 0.85 | 0.48 | 0.09 | 1.79E-271 | Fibroblasts | CD302 | 0.10 |
| LOXL11 | 9.27E-273 | 0.93 | 0.50 | 0.09 | 2.15E-268 | Fibroblasts | LOXL1 | 0.10 |
| COLEC121 | 1.25E-267 | 0.93 | 0.45 | 0.08 | 2.90E-263 | Fibroblasts | COLEC12 | 0.09 |
| DLC13 | 4.09E-263 | 0.82 | 0.48 | 0.09 | 9.50E-259 | Fibroblasts | DLC1 | 0.10 |
| SH3D191 | 6.08E-255 | 0.79 | 0.43 | 0.08 | 1.41E-250 | Fibroblasts | SH3D19 | 0.08 |
| IGFBP32 | 8.96E-248 | 1.52 | 0.46 | 0.08 | 2.08E-243 | Fibroblasts | IGFBP3 | 0.09 |
| PRICKLE11 | 1.94E-237 | 0.88 | 0.45 | 0.09 | 4.50E-233 | Fibroblasts | PRICKLE1 | 0.10 |
| FRMD62 | 1.02E-235 | 0.80 | 0.45 | 0.09 | 2.36E-231 | Fibroblasts | FRMD6 | 0.09 |
| FMOD1 | 1.73E-225 | 0.64 | 0.44 | 0.08 | 4.02E-221 | Fibroblasts | FMOD | 0.09 |
| MITF2 | 2.08E-221 | 0.80 | 0.42 | 0.08 | 4.82E-217 | Fibroblasts | MITF | 0.09 |
| FXYD61 | 1.11E-218 | 0.82 | 0.40 | 0.08 | 2.57E-214 | Fibroblasts | FXYD6 | 0.08 |
| RECK1 | 5.46E-194 | 0.79 | 0.42 | 0.09 | 1.27E-189 | Fibroblasts | RECK | 0.10 |
| C1QB | 0 | 3.95 | 0.62 | 0.05 | 0 | Monocyte1 | C1QB | 0.07 |
| CXCL10 | 0 | 3.93 | 0.53 | 0.04 | 0 | Monocyte1 | CXCL10 | 0.06 |
| C1QA | 0 | 3.83 | 0.65 | 0.05 | 0 | Monocyte1 | C1QA | 0.08 |
| C1QC | 0 | 3.79 | 0.65 | 0.05 | 0 | Monocyte1 | C1QC | 0.08 |
| C15orf481 | 0 | 3.06 | 0.82 | 0.06 | 0 | Monocyte1 | C15orf48 | 0.10 |
| FCGR3A | 0 | 2.99 | 0.85 | 0.05 | 0 | Monocyte1 | FCGR3A | 0.08 |
| CXCL9 | 0 | 2.65 | 0.40 | 0.03 | 0 | Monocyte1 | CXCL9 | 0.05 |
| MS4A6A1 | 0 | 2.46 | 0.78 | 0.05 | 0 | Monocyte1 | MS4A6A | 0.09 |
| MS4A7 | 0 | 2.31 | 0.79 | 0.06 | 0 | Monocyte1 | MS4A7 | 0.09 |
| FPR3 | 0 | 2.11 | 0.78 | 0.02 | 0 | Monocyte1 | FPR3 | 0.06 |
| CYBB3 | 0 | 2.09 | 0.73 | 0.06 | 0 | Monocyte1 | CYBB | 0.10 |
| IL1RN | 0 | 2.06 | 0.50 | 0.03 | 0 | Monocyte1 | IL1RN | 0.05 |
| LILRB41 | 0 | 2.04 | 0.75 | 0.04 | 0 | Monocyte1 | LILRB4 | 0.07 |
| FCGR2A | 0 | 2.03 | 0.78 | 0.06 | 0 | Monocyte1 | FCGR2A | 0.09 |
| SLC11A1 | 0 | 1.87 | 0.59 | 0.04 | 0 | Monocyte1 | SLC11A1 | 0.06 |
| IFIT21 | 0 | 1.83 | 0.54 | 0.08 | 0 | Monocyte1 | IFIT2 | 0.10 |
| MSR1 | 0 | 1.78 | 0.65 | 0.02 | 0 | Monocyte1 | MSR1 | 0.05 |
| MNDA | 0 | 1.75 | 0.72 | 0.05 | 0 | Monocyte1 | MNDA | 0.08 |
| CD163 | 0 | 1.71 | 0.59 | 0.02 | 0 | Monocyte1 | CD163 | 0.05 |
| IL4I1 | 0 | 1.68 | 0.60 | 0.04 | 0 | Monocyte1 | IL4I1 | 0.07 |
| IFI30 | 0 | 1.63 | 0.63 | 0.05 | 0 | Monocyte1 | IFI30 | 0.08 |
| SDS | 0 | 1.60 | 0.41 | 0.01 | 0 | Monocyte1 | SDS | 0.03 |
| TREM2 | 0 | 1.58 | 0.54 | 0.02 | 0 | Monocyte1 | TREM2 | 0.05 |
| NCF2 | 0 | 1.56 | 0.67 | 0.04 | 0 | Monocyte1 | NCF2 | 0.07 |
| CSF1R | 0 | 1.53 | 0.67 | 0.04 | 0 | Monocyte1 | CSF1R | 0.07 |
| ADAP2 | 0 | 1.51 | 0.66 | 0.04 | 0 | Monocyte1 | ADAP2 | 0.07 |
| PLA2G7 | 0 | 1.51 | 0.45 | 0.02 | 0 | Monocyte1 | PLA2G7 | 0.04 |
| MS4A4A | 0 | 1.50 | 0.58 | 0.02 | 0 | Monocyte1 | MS4A4A | 0.05 |
| S100A82 | 0 | 1.50 | 0.45 | 0.06 | 0 | Monocyte1 | S100A8 | 0.08 |
| FCGR1A | 0 | 1.50 | 0.60 | 0.03 | 0 | Monocyte1 | FCGR1A | 0.05 |
| PILRA | 0 | 1.48 | 0.62 | 0.04 | 0 | Monocyte1 | PILRA | 0.06 |
| RASSF4 | 0 | 1.47 | 0.62 | 0.06 | 0 | Monocyte1 | RASSF4 | 0.09 |
| IGSF61 | 0 | 1.47 | 0.61 | 0.03 | 0 | Monocyte1 | IGSF6 | 0.06 |
| LILRB2 | 0 | 1.43 | 0.58 | 0.02 | 0 | Monocyte1 | LILRB2 | 0.05 |
| SIGLEC1 | 0 | 1.42 | 0.58 | 0.01 | 0 | Monocyte1 | SIGLEC1 | 0.04 |
| LILRB11 | 0 | 1.41 | 0.60 | 0.04 | 0 | Monocyte1 | LILRB1 | 0.07 |
| CD86 | 0 | 1.39 | 0.67 | 0.04 | 0 | Monocyte1 | CD86 | 0.07 |
| OLR1 | 0 | 1.37 | 0.48 | 0.02 | 0 | Monocyte1 | OLR1 | 0.04 |
| MARCH13 | 0 | 1.37 | 0.67 | 0.06 | 0 | Monocyte1 | 1-Mar | 0.09 |
| CLEC5A | 0 | 1.36 | 0.43 | 0.02 | 0 | Monocyte1 | CLEC5A | 0.04 |
| LINC01272 | 0 | 1.33 | 0.53 | 0.04 | 0 | Monocyte1 | LINC01272 | 0.07 |
| SLC7A7 | 0 | 1.30 | 0.59 | 0.05 | 0 | Monocyte1 | SLC7A7 | 0.08 |
| RNASE62 | 0 | 1.30 | 0.60 | 0.07 | 0 | Monocyte1 | RNASE6 | 0.09 |
| SLCO2B11 | 0 | 1.26 | 0.52 | 0.03 | 0 | Monocyte1 | SLCO2B1 | 0.05 |
| TFEC | 0 | 1.18 | 0.56 | 0.02 | 0 | Monocyte1 | TFEC | 0.05 |
| CCR1 | 0 | 1.17 | 0.57 | 0.05 | 0 | Monocyte1 | CCR1 | 0.07 |
| FCGR2B1 | 0 | 1.17 | 0.49 | 0.06 | 0 | Monocyte1 | FCGR2B | 0.08 |
| NPL | 0 | 1.16 | 0.53 | 0.04 | 0 | Monocyte1 | NPL | 0.06 |
| HCK | 0 | 1.16 | 0.59 | 0.04 | 0 | Monocyte1 | HCK | 0.07 |
| STAB11 | 0 | 1.15 | 0.45 | 0.04 | 0 | Monocyte1 | STAB1 | 0.06 |
| PTAFR1 | 0 | 1.14 | 0.55 | 0.03 | 0 | Monocyte1 | PTAFR | 0.06 |
| IL181 | 0 | 1.11 | 0.48 | 0.04 | 0 | Monocyte1 | IL18 | 0.06 |
| C5AR1 | 0 | 1.10 | 0.47 | 0.02 | 0 | Monocyte1 | C5AR1 | 0.05 |
| PIK3AP13 | 0 | 1.09 | 0.58 | 0.06 | 0 | Monocyte1 | PIK3AP1 | 0.08 |
| C3AR11 | 0 | 1.09 | 0.55 | 0.04 | 0 | Monocyte1 | C3AR1 | 0.06 |
| SDC3 | 0 | 1.05 | 0.43 | 0.06 | 0 | Monocyte1 | SDC3 | 0.08 |
| SLAMF8 | 0 | 1.04 | 0.50 | 0.03 | 0 | Monocyte1 | SLAMF8 | 0.05 |
| DMXL21 | 0 | 1.04 | 0.52 | 0.06 | 0 | Monocyte1 | DMXL2 | 0.08 |
| CD300A2 | 0 | 1.02 | 0.53 | 0.06 | 0 | Monocyte1 | CD300A | 0.09 |
| SLC8A1 | 0 | 1.02 | 0.51 | 0.03 | 0 | Monocyte1 | SLC8A1 | 0.05 |
| MPEG11 | 0 | 0.97 | 0.46 | 0.03 | 0 | Monocyte1 | MPEG1 | 0.05 |
| SLC31A2 | 0 | 0.96 | 0.52 | 0.07 | 0 | Monocyte1 | SLC31A2 | 0.09 |
| FGR | 0 | 0.95 | 0.46 | 0.04 | 0 | Monocyte1 | FGR | 0.06 |
| TMEM51 | 0 | 0.93 | 0.49 | 0.06 | 0 | Monocyte1 | TMEM51 | 0.08 |
| ALOX54 | 0 | 0.92 | 0.56 | 0.07 | 0 | Monocyte1 | ALOX5 | 0.09 |
| FMNL2 | 0 | 0.90 | 0.47 | 0.06 | 0 | Monocyte1 | FMNL2 | 0.08 |
| ITGAX | 0 | 0.90 | 0.46 | 0.03 | 0 | Monocyte1 | ITGAX | 0.05 |
| RAB201 | 0 | 0.89 | 0.45 | 0.06 | 0 | Monocyte1 | RAB20 | 0.08 |
| C1orf541 | 0 | 0.88 | 0.46 | 0.07 | 0 | Monocyte1 | C1orf54 | 0.09 |
| LILRB3 | 0 | 0.86 | 0.44 | 0.02 | 0 | Monocyte1 | LILRB3 | 0.04 |
| FNIP2 | 0 | 0.86 | 0.41 | 0.08 | 0 | Monocyte1 | FNIP2 | 0.09 |
| CSTA | 0 | 0.83 | 0.45 | 0.07 | 0 | Monocyte1 | CSTA | 0.09 |
| EMILIN2 | 0 | 0.83 | 0.46 | 0.04 | 0 | Monocyte1 | EMILIN2 | 0.06 |
| BCAT11 | 0 | 0.83 | 0.46 | 0.07 | 0 | Monocyte1 | BCAT1 | 0.09 |
| CPVL1 | 0 | 0.83 | 0.41 | 0.05 | 0 | Monocyte1 | CPVL | 0.07 |
| SYK4 | 0 | 0.82 | 0.52 | 0.08 | 0 | Monocyte1 | SYK | 0.10 |
| LY862 | 0 | 0.82 | 0.50 | 0.05 | 0 | Monocyte1 | LY86 | 0.08 |
| PLEKHO2 | 0 | 0.80 | 0.45 | 0.06 | 0 | Monocyte1 | PLEKHO2 | 0.08 |
| TNFSF131 | 0 | 0.80 | 0.40 | 0.05 | 0 | Monocyte1 | TNFSF13 | 0.07 |
| ITGAM1 | 0 | 0.79 | 0.44 | 0.04 | 0 | Monocyte1 | ITGAM | 0.06 |
| SPRED1 | 0 | 0.79 | 0.42 | 0.08 | 0 | Monocyte1 | SPRED1 | 0.10 |
| LRRC25 | 0 | 0.79 | 0.45 | 0.02 | 0 | Monocyte1 | LRRC25 | 0.04 |
| SLC25A19 | 0 | 0.77 | 0.42 | 0.07 | 0 | Monocyte1 | SLC25A19 | 0.08 |
| EPB41L3 | 0 | 0.77 | 0.44 | 0.04 | 0 | Monocyte1 | EPB41L3 | 0.06 |
| ST144 | 0 | 0.75 | 0.41 | 0.08 | 0 | Monocyte1 | ST14 | 0.09 |
| CSF3R | 0 | 0.74 | 0.41 | 0.03 | 0 | Monocyte1 | CSF3R | 0.05 |
| SLC15A3 | 0 | 0.74 | 0.42 | 0.05 | 0 | Monocyte1 | SLC15A3 | 0.06 |
| LPCAT22 | 0 | 0.73 | 0.44 | 0.08 | 0 | Monocyte1 | LPCAT2 | 0.10 |
| IRF83 | 0 | 0.62 | 0.48 | 0.07 | 0 | Monocyte1 | IRF8 | 0.09 |
| S100A83 | 0 | 3.53 | 0.43 | 0.07 | 0 | Monocyte2 | S100A8 | 0.08 |
| C1QC1 | 0 | 2.85 | 0.49 | 0.06 | 0 | Monocyte2 | C1QC | 0.08 |
| IL1B1 | 0 | 2.67 | 0.49 | 0.03 | 0 | Monocyte2 | IL1B | 0.05 |
| MS4A6A2 | 0 | 2.66 | 0.75 | 0.07 | 0 | Monocyte2 | MS4A6A | 0.09 |
| C1QB1 | 0 | 2.53 | 0.47 | 0.06 | 0 | Monocyte2 | C1QB | 0.07 |
| C1QA1 | 0 | 2.50 | 0.49 | 0.07 | 0 | Monocyte2 | C1QA | 0.08 |
| FCGR3A1 | 0 | 2.05 | 0.61 | 0.07 | 0 | Monocyte2 | FCGR3A | 0.08 |
| MS4A71 | 0 | 2.02 | 0.69 | 0.08 | 0 | Monocyte2 | MS4A7 | 0.09 |
| CPVL2 | 0 | 1.97 | 0.62 | 0.05 | 0 | Monocyte2 | CPVL | 0.07 |
| CSF1R1 | 0 | 1.95 | 0.68 | 0.05 | 0 | Monocyte2 | CSF1R | 0.07 |
| STAB12 | 0 | 1.91 | 0.51 | 0.05 | 0 | Monocyte2 | STAB1 | 0.06 |
| MNDA1 | 0 | 1.76 | 0.65 | 0.06 | 0 | Monocyte2 | MNDA | 0.08 |
| FCGR2A1 | 0 | 1.72 | 0.65 | 0.08 | 0 | Monocyte2 | FCGR2A | 0.09 |
| CYBB4 | 0 | 1.72 | 0.70 | 0.08 | 0 | Monocyte2 | CYBB | 0.10 |
| CD1631 | 0 | 1.69 | 0.48 | 0.04 | 0 | Monocyte2 | CD163 | 0.05 |
| SLC11A11 | 0 | 1.66 | 0.44 | 0.05 | 0 | Monocyte2 | SLC11A1 | 0.06 |
| IFI301 | 0 | 1.62 | 0.55 | 0.07 | 0 | Monocyte2 | IFI30 | 0.08 |
| IGSF62 | 0 | 1.53 | 0.54 | 0.05 | 0 | Monocyte2 | IGSF6 | 0.06 |
| FCGR2B2 | 0 | 1.52 | 0.51 | 0.07 | 0 | Monocyte2 | FCGR2B | 0.08 |
| HCK1 | 0 | 1.43 | 0.63 | 0.05 | 0 | Monocyte2 | HCK | 0.07 |
| RASSF41 | 0 | 1.35 | 0.59 | 0.08 | 0 | Monocyte2 | RASSF4 | 0.09 |
| ADAP21 | 0 | 1.35 | 0.56 | 0.06 | 0 | Monocyte2 | ADAP2 | 0.07 |
| FCGR1A1 | 0 | 1.33 | 0.47 | 0.04 | 0 | Monocyte2 | FCGR1A | 0.05 |
| VSIG41 | 0 | 1.32 | 0.44 | 0.03 | 0 | Monocyte2 | VSIG4 | 0.04 |
| NCF21 | 0 | 1.31 | 0.57 | 0.06 | 0 | Monocyte2 | NCF2 | 0.07 |
| C5AR11 | 0 | 1.29 | 0.41 | 0.03 | 0 | Monocyte2 | C5AR1 | 0.05 |
| RNASE63 | 0 | 1.20 | 0.53 | 0.08 | 0 | Monocyte2 | RNASE6 | 0.09 |
| LILRB21 | 0 | 1.18 | 0.49 | 0.04 | 0 | Monocyte2 | LILRB2 | 0.05 |
| SLCO2B12 | 0 | 1.17 | 0.41 | 0.04 | 0 | Monocyte2 | SLCO2B1 | 0.05 |
| CSTA1 | 0 | 1.16 | 0.48 | 0.08 | 0 | Monocyte2 | CSTA | 0.09 |
| CSF3R1 | 0 | 1.16 | 0.49 | 0.04 | 0 | Monocyte2 | CSF3R | 0.05 |
| NAIP1 | 0 | 1.15 | 0.52 | 0.08 | 0 | Monocyte2 | NAIP | 0.09 |
| TBXAS12 | 0 | 1.13 | 0.55 | 0.06 | 0 | Monocyte2 | TBXAS1 | 0.07 |
| PILRA1 | 0 | 1.12 | 0.52 | 0.05 | 0 | Monocyte2 | PILRA | 0.06 |
| MPEG12 | 0 | 1.11 | 0.49 | 0.04 | 0 | Monocyte2 | MPEG1 | 0.05 |
| ALOX55 | 0 | 1.11 | 0.57 | 0.08 | 0 | Monocyte2 | ALOX5 | 0.09 |
| MSR11 | 0 | 1.09 | 0.42 | 0.04 | 0 | Monocyte2 | MSR1 | 0.05 |
| LY863 | 0 | 1.09 | 0.56 | 0.06 | 0 | Monocyte2 | LY86 | 0.08 |
| FGR1 | 0 | 1.09 | 0.47 | 0.05 | 0 | Monocyte2 | FGR | 0.06 |
| IL182 | 0 | 1.09 | 0.48 | 0.05 | 0 | Monocyte2 | IL18 | 0.06 |
| SYK5 | 0 | 1.06 | 0.57 | 0.08 | 0 | Monocyte2 | SYK | 0.10 |
| LILRB12 | 0 | 1.06 | 0.47 | 0.05 | 0 | Monocyte2 | LILRB1 | 0.07 |
| FPR11 | 0 | 1.04 | 0.41 | 0.03 | 0 | Monocyte2 | FPR1 | 0.04 |
| SLC7A71 | 0 | 0.99 | 0.48 | 0.06 | 0 | Monocyte2 | SLC7A7 | 0.08 |
| TNFSF132 | 0 | 0.98 | 0.46 | 0.05 | 0 | Monocyte2 | TNFSF13 | 0.07 |
| MARCH14 | 0 | 0.98 | 0.55 | 0.07 | 0 | Monocyte2 | 1-Mar | 0.09 |
| FPR31 | 0 | 0.97 | 0.44 | 0.05 | 0 | Monocyte2 | FPR3 | 0.06 |
| LILRB42 | 0 | 0.97 | 0.48 | 0.06 | 0 | Monocyte2 | LILRB4 | 0.07 |
| CD933 | 0 | 0.97 | 0.44 | 0.06 | 0 | Monocyte2 | CD93 | 0.07 |
| CD861 | 0 | 0.94 | 0.47 | 0.06 | 0 | Monocyte2 | CD86 | 0.07 |
| PTAFR2 | 0 | 0.89 | 0.46 | 0.05 | 0 | Monocyte2 | PTAFR | 0.06 |
| ITGAX1 | 0 | 0.88 | 0.40 | 0.04 | 0 | Monocyte2 | ITGAX | 0.05 |
| LRRC251 | 0 | 0.86 | 0.42 | 0.03 | 0 | Monocyte2 | LRRC25 | 0.04 |
| SLC8A11 | 0 | 0.83 | 0.42 | 0.04 | 0 | Monocyte2 | SLC8A1 | 0.05 |
| ITGAM2 | 0 | 0.82 | 0.42 | 0.05 | 0 | Monocyte2 | ITGAM | 0.06 |
| CD300A3 | 4.61E-269 | 0.71 | 0.42 | 0.08 | 1.07E-264 | Monocyte2 | CD300A | 0.09 |
| IRF84 | 1.48E-238 | 0.89 | 0.40 | 0.08 | 3.45E-234 | Monocyte2 | IRF8 | 0.09 |
| CXCL82 | 0 | 3.65 | 0.61 | 0.03 | 0 | Monocyte3 | CXCL8 | 0.04 |
| C15orf483 | 0 | 3.44 | 0.86 | 0.09 | 0 | Monocyte3 | C15orf48 | 0.10 |
| G0S2 | 0 | 2.82 | 0.46 | 0.04 | 0 | Monocyte3 | G0S2 | 0.05 |
| C1QA2 | 0 | 2.58 | 0.67 | 0.07 | 0 | Monocyte3 | C1QA | 0.08 |
| MMP91 | 0 | 2.53 | 0.57 | 0.04 | 0 | Monocyte3 | MMP9 | 0.04 |
| C1QB2 | 0 | 2.41 | 0.62 | 0.07 | 0 | Monocyte3 | C1QB | 0.07 |
| CCL3L32 | 0 | 2.33 | 0.51 | 0.05 | 0 | Monocyte3 | CCL3L3 | 0.06 |
| IL1B2 | 0 | 2.18 | 0.50 | 0.04 | 0 | Monocyte3 | IL1B | 0.05 |
| CXCL31 | 0 | 2.06 | 0.42 | 0.03 | 0 | Monocyte3 | CXCL3 | 0.03 |
| C1QC2 | 0 | 2.05 | 0.61 | 0.07 | 0 | Monocyte3 | C1QC | 0.08 |
| CXCL22 | 0 | 1.77 | 0.41 | 0.04 | 0 | Monocyte3 | CXCL2 | 0.04 |
| MS4A72 | 0 | 1.73 | 0.73 | 0.08 | 0 | Monocyte3 | MS4A7 | 0.09 |
| FCGR2A2 | 0 | 1.69 | 0.73 | 0.09 | 0 | Monocyte3 | FCGR2A | 0.09 |
| IL1RN1 | 0 | 1.66 | 0.53 | 0.04 | 0 | Monocyte3 | IL1RN | 0.05 |
| CSTA2 | 0 | 1.62 | 0.68 | 0.08 | 0 | Monocyte3 | CSTA | 0.09 |
| TREM11 | 0 | 1.57 | 0.55 | 0.03 | 0 | Monocyte3 | TREM1 | 0.03 |
| CLEC5A2 | 0 | 1.54 | 0.62 | 0.04 | 0 | Monocyte3 | CLEC5A | 0.04 |
| FCGR3A2 | 0 | 1.37 | 0.68 | 0.08 | 0 | Monocyte3 | FCGR3A | 0.08 |
| LILRB43 | 0 | 1.27 | 0.65 | 0.06 | 0 | Monocyte3 | LILRB4 | 0.07 |
| RNASE64 | 0 | 1.27 | 0.67 | 0.08 | 0 | Monocyte3 | RNASE6 | 0.09 |
| CYBB5 | 0 | 1.26 | 0.66 | 0.09 | 0 | Monocyte3 | CYBB | 0.10 |
| NCF22 | 0 | 1.23 | 0.65 | 0.07 | 0 | Monocyte3 | NCF2 | 0.07 |
| CSF1R2 | 0 | 1.13 | 0.57 | 0.06 | 0 | Monocyte3 | CSF1R | 0.07 |
| TREM22 | 0 | 1.11 | 0.46 | 0.04 | 0 | Monocyte3 | TREM2 | 0.05 |
| CD862 | 0 | 1.01 | 0.57 | 0.07 | 0 | Monocyte3 | CD86 | 0.07 |
| IGSF63 | 0 | 1.01 | 0.52 | 0.06 | 0 | Monocyte3 | IGSF6 | 0.06 |
| SLC7A72 | 0 | 0.99 | 0.57 | 0.07 | 0 | Monocyte3 | SLC7A7 | 0.08 |
| FCGR1A2 | 0 | 0.89 | 0.48 | 0.05 | 0 | Monocyte3 | FCGR1A | 0.05 |
| LINC012722 | 1.87E-289 | 1.11 | 0.51 | 0.06 | 4.34E-285 | Monocyte3 | LINC01272 | 0.07 |
| MS4A6A3 | 2.34E-289 | 1.66 | 0.61 | 0.08 | 5.44E-285 | Monocyte3 | MS4A6A | 0.09 |
| SLC11A12 | 1.03E-274 | 0.95 | 0.50 | 0.06 | 2.40E-270 | Monocyte3 | SLC11A1 | 0.06 |
| MS4A4A2 | 1.11E-272 | 0.90 | 0.43 | 0.04 | 2.57E-268 | Monocyte3 | MS4A4A | 0.05 |
| IL4I11 | 1.87E-255 | 1.11 | 0.50 | 0.06 | 4.34E-251 | Monocyte3 | IL4I1 | 0.07 |
| KYNU3 | 9.64E-249 | 0.94 | 0.47 | 0.06 | 2.24E-244 | Monocyte3 | KYNU | 0.06 |
| SLAMF82 | 1.96E-244 | 0.63 | 0.43 | 0.05 | 4.56E-240 | Monocyte3 | SLAMF8 | 0.05 |
| GNA153 | 6.30E-240 | 0.97 | 0.52 | 0.07 | 1.46E-235 | Monocyte3 | GNA15 | 0.08 |
| HK22 | 3.52E-237 | 1.50 | 0.53 | 0.08 | 8.17E-233 | Monocyte3 | HK2 | 0.09 |
| MARCH15 | 1.13E-225 | 0.79 | 0.55 | 0.08 | 2.63E-221 | Monocyte3 | 1-Mar | 0.09 |
| HCK2 | 1.72E-223 | 0.78 | 0.47 | 0.06 | 3.99E-219 | Monocyte3 | HCK | 0.07 |
| CD1632 | 2.42E-222 | 0.72 | 0.41 | 0.05 | 5.61E-218 | Monocyte3 | CD163 | 0.05 |
| BCAT13 | 5.01E-222 | 0.99 | 0.54 | 0.08 | 1.16E-217 | Monocyte3 | BCAT1 | 0.09 |
| FCGR2B3 | 5.67E-219 | 1.03 | 0.50 | 0.07 | 1.32E-214 | Monocyte3 | FCGR2B | 0.08 |
| FPR32 | 1.75E-211 | 0.75 | 0.44 | 0.06 | 4.06E-207 | Monocyte3 | FPR3 | 0.06 |
| MNDA2 | 8.63E-200 | 1.07 | 0.50 | 0.08 | 2.00E-195 | Monocyte3 | MNDA | 0.08 |
| IL183 | 1.16E-196 | 0.57 | 0.43 | 0.06 | 2.70E-192 | Monocyte3 | IL18 | 0.06 |
| PILRA2 | 9.61E-188 | 0.78 | 0.42 | 0.06 | 2.23E-183 | Monocyte3 | PILRA | 0.06 |
| CCR12 | 1.19E-181 | 0.74 | 0.46 | 0.07 | 2.77E-177 | Monocyte3 | CCR1 | 0.07 |
| ANPEP3 | 4.68E-181 | 0.82 | 0.42 | 0.06 | 1.09E-176 | Monocyte3 | ANPEP | 0.07 |
| ADAP22 | 1.19E-170 | 0.74 | 0.44 | 0.07 | 2.75E-166 | Monocyte3 | ADAP2 | 0.07 |
| CD300A4 | 2.54E-162 | 0.71 | 0.48 | 0.08 | 5.90E-158 | Monocyte3 | CD300A | 0.09 |
| LY864 | 1.54E-153 | 0.59 | 0.43 | 0.07 | 3.57E-149 | Monocyte3 | LY86 | 0.08 |
| METRNL3 | 6.85E-152 | 0.89 | 0.44 | 0.08 | 1.59E-147 | Monocyte3 | METRNL | 0.08 |
| TMEM512 | 4.29E-150 | 0.65 | 0.42 | 0.07 | 9.96E-146 | Monocyte3 | TMEM51 | 0.08 |
| S100A84 | 1.03E-144 | 1.32 | 0.43 | 0.08 | 2.38E-140 | Monocyte3 | S100A8 | 0.08 |
| PIK3AP15 | 3.05E-133 | 0.63 | 0.43 | 0.08 | 7.07E-129 | Monocyte3 | PIK3AP1 | 0.08 |
| C1orf543 | 1.02E-128 | 0.75 | 0.43 | 0.09 | 2.36E-124 | Monocyte3 | C1orf54 | 0.09 |
| RASSF42 | 2.55E-117 | 0.60 | 0.43 | 0.09 | 5.91E-113 | Monocyte3 | RASSF4 | 0.09 |
| SYK6 | 4.58E-112 | 0.56 | 0.44 | 0.09 | 1.06E-107 | Monocyte3 | SYK | 0.10 |
| ALOX56 | 8.19E-93 | 0.44 | 0.40 | 0.09 | 1.90E-88 | Monocyte3 | ALOX5 | 0.09 |
| CD1A | 0 | 3.71 | 0.99 | 0.00 | 0 | Monocyte4 | CD1A | 0.01 |
| FCGBP | 0 | 3.31 | 0.86 | 0.02 | 0 | Monocyte4 | FCGBP | 0.02 |
| CD207 | 0 | 3.01 | 0.80 | 0.00 | 0 | Monocyte4 | CD207 | 0.00 |
| FCER1A1 | 0 | 2.96 | 0.87 | 0.01 | 0 | Monocyte4 | FCER1A | 0.02 |
| PLEK21 | 0 | 2.39 | 0.81 | 0.03 | 0 | Monocyte4 | PLEK2 | 0.03 |
| CD1E | 0 | 2.04 | 0.80 | 0.01 | 0 | Monocyte4 | CD1E | 0.01 |
| CD1C | 0 | 1.69 | 0.63 | 0.02 | 0 | Monocyte4 | CD1C | 0.02 |
| IL22RA2 | 0 | 1.64 | 0.63 | 0.00 | 0 | Monocyte4 | IL22RA2 | 0.00 |
| FFAR4 | 0 | 1.33 | 0.67 | 0.01 | 0 | Monocyte4 | FFAR4 | 0.01 |
| RP11-597D13.8 | 0 | 0.89 | 0.51 | 0.00 | 0 | Monocyte4 | RP11-597D13.8 | 0.00 |
| SCN9A1 | 0 | 0.85 | 0.41 | 0.01 | 0 | Monocyte4 | SCN9A | 0.01 |
| SUCNR1 | 4.70E-300 | 0.75 | 0.50 | 0.01 | 1.09E-295 | Monocyte4 | SUCNR1 | 0.01 |
| HPGDS1 | 3.91E-296 | 1.32 | 0.61 | 0.02 | 9.07E-292 | Monocyte4 | HPGDS | 0.02 |
| GAS2L3 | 4.67E-281 | 0.92 | 0.61 | 0.02 | 1.08E-276 | Monocyte4 | GAS2L3 | 0.02 |
| PPM1N | 5.51E-258 | 1.71 | 0.76 | 0.03 | 1.28E-253 | Monocyte4 | PPM1N | 0.03 |
| HLA-DQB22 | 1.92E-254 | 4.57 | 0.94 | 0.05 | 4.46E-250 | Monocyte4 | HLA-DQB2 | 0.06 |
| P2RY141 | 3.91E-244 | 1.07 | 0.57 | 0.02 | 9.08E-240 | Monocyte4 | P2RY14 | 0.02 |
| IDO1 | 3.13E-243 | 1.38 | 0.67 | 0.03 | 7.26E-239 | Monocyte4 | IDO1 | 0.03 |
| CLEC4A3 | 1.02E-222 | 1.78 | 0.77 | 0.04 | 2.37E-218 | Monocyte4 | CLEC4A | 0.04 |
| IL184 | 5.31E-169 | 1.70 | 0.84 | 0.06 | 1.23E-164 | Monocyte4 | IL18 | 0.06 |
| MNDA3 | 9.82E-166 | 2.55 | 0.94 | 0.08 | 2.28E-161 | Monocyte4 | MNDA | 0.08 |
| SERPINF21 | 3.61E-160 | 0.74 | 0.49 | 0.02 | 8.39E-156 | Monocyte4 | SERPINF2 | 0.02 |
| C15orf484 | 7.28E-158 | 3.41 | 1.00 | 0.10 | 1.69E-153 | Monocyte4 | C15orf48 | 0.10 |
| CD863 | 1.18E-153 | 1.44 | 0.90 | 0.07 | 2.74E-149 | Monocyte4 | CD86 | 0.07 |
| IGSF64 | 9.61E-145 | 1.46 | 0.80 | 0.06 | 2.23E-140 | Monocyte4 | IGSF6 | 0.06 |
| FAM109A | 1.53E-144 | 1.26 | 0.61 | 0.04 | 3.55E-140 | Monocyte4 | FAM109A | 0.04 |
| CSF1R3 | 5.01E-138 | 1.60 | 0.83 | 0.07 | 1.16E-133 | Monocyte4 | CSF1R | 0.07 |
| HCK3 | 8.88E-138 | 1.34 | 0.81 | 0.07 | 2.06E-133 | Monocyte4 | HCK | 0.07 |
| RNASE65 | 1.76E-130 | 2.30 | 0.90 | 0.09 | 4.09E-126 | Monocyte4 | RNASE6 | 0.09 |
| GTF2IRD1 | 1.72E-129 | 1.13 | 0.60 | 0.04 | 3.99E-125 | Monocyte4 | GTF2IRD1 | 0.04 |
| TNFAIP8L22 | 3.29E-123 | 1.11 | 0.69 | 0.05 | 7.64E-119 | Monocyte4 | TNFAIP8L2 | 0.05 |
| PARM1 | 1.22E-122 | 0.87 | 0.61 | 0.04 | 2.84E-118 | Monocyte4 | PARM1 | 0.04 |
| CXorf214 | 2.72E-118 | 1.19 | 0.66 | 0.05 | 6.30E-114 | Monocyte4 | CXorf21 | 0.05 |
| LY865 | 1.47E-115 | 1.28 | 0.80 | 0.07 | 3.41E-111 | Monocyte4 | LY86 | 0.08 |
| MARCH16 | 1.05E-114 | 1.64 | 0.84 | 0.09 | 2.43E-110 | Monocyte4 | 1-Mar | 0.09 |
| CPVL4 | 1.65E-114 | 1.65 | 0.73 | 0.06 | 3.84E-110 | Monocyte4 | CPVL | 0.07 |
| CLEC5A3 | 1.85E-110 | 1.15 | 0.59 | 0.04 | 4.30E-106 | Monocyte4 | CLEC5A | 0.04 |
| CCR62 | 6.95E-109 | 0.95 | 0.63 | 0.05 | 1.61E-104 | Monocyte4 | CCR6 | 0.05 |
| CSF2RA4 | 2.40E-108 | 0.99 | 0.54 | 0.04 | 5.58E-104 | Monocyte4 | CSF2RA | 0.04 |
| GNA154 | 7.20E-103 | 1.81 | 0.74 | 0.08 | 1.67E-98 | Monocyte4 | GNA15 | 0.08 |
| GPAT3 | 6.96E-102 | 0.93 | 0.57 | 0.04 | 1.62E-97 | Monocyte4 | GPAT3 | 0.05 |
| ALOX57 | 4.28E-100 | 1.10 | 0.84 | 0.09 | 9.94E-96 | Monocyte4 | ALOX5 | 0.09 |
| NCF23 | 5.61E-99 | 1.25 | 0.73 | 0.07 | 1.30E-94 | Monocyte4 | NCF2 | 0.07 |
| CA22 | 7.72E-95 | 1.84 | 0.80 | 0.09 | 1.79E-90 | Monocyte4 | CA2 | 0.09 |
| CLECL11 | 3.71E-92 | 1.09 | 0.56 | 0.05 | 8.62E-88 | Monocyte4 | CLECL1 | 0.05 |
| ADAM285 | 2.01E-87 | 0.99 | 0.71 | 0.08 | 4.67E-83 | Monocyte4 | ADAM28 | 0.08 |
| RASSF43 | 4.71E-87 | 1.29 | 0.77 | 0.09 | 1.09E-82 | Monocyte4 | RASSF4 | 0.09 |
| NRN12 | 5.75E-87 | 1.37 | 0.69 | 0.07 | 1.33E-82 | Monocyte4 | NRN1 | 0.08 |
| APOBR2 | 8.03E-87 | 0.73 | 0.54 | 0.04 | 1.86E-82 | Monocyte4 | APOBR | 0.05 |
| TRPM41 | 2.08E-85 | 1.55 | 0.66 | 0.07 | 4.82E-81 | Monocyte4 | TRPM4 | 0.08 |
| CD334 | 3.35E-85 | 0.80 | 0.49 | 0.04 | 7.79E-81 | Monocyte4 | CD33 | 0.04 |
| CTA-384D8.341 | 6.32E-84 | 0.92 | 0.41 | 0.03 | 1.47E-79 | Monocyte4 | CTA-384D8.34 | 0.03 |
| GNAI1 | 5.00E-82 | 0.80 | 0.54 | 0.05 | 1.16E-77 | Monocyte4 | GNAI1 | 0.05 |
| SLC8A13 | 1.84E-78 | 1.01 | 0.56 | 0.05 | 4.27E-74 | Monocyte4 | SLC8A1 | 0.05 |
| DAPP15 | 1.06E-77 | 1.31 | 0.74 | 0.10 | 2.46E-73 | Monocyte4 | DAPP1 | 0.10 |
| HLA-DOB3 | 1.09E-72 | 0.82 | 0.50 | 0.05 | 2.52E-68 | Monocyte4 | HLA-DOB | 0.05 |
| MCOLN21 | 7.47E-69 | 0.80 | 0.53 | 0.05 | 1.73E-64 | Monocyte4 | MCOLN2 | 0.05 |
| CLDN12 | 3.16E-65 | 1.21 | 0.50 | 0.05 | 7.34E-61 | Monocyte4 | CLDN1 | 0.05 |
| CD300A5 | 5.16E-65 | 0.96 | 0.67 | 0.09 | 1.20E-60 | Monocyte4 | CD300A | 0.09 |
| CYSLTR11 | 3.70E-60 | 0.78 | 0.60 | 0.07 | 8.60E-56 | Monocyte4 | CYSLTR1 | 0.08 |
| BTK6 | 2.42E-51 | 0.72 | 0.54 | 0.07 | 5.62E-47 | Monocyte4 | BTK | 0.07 |
| FCGR2A3 | 3.04E-50 | 0.80 | 0.63 | 0.09 | 7.07E-46 | Monocyte4 | FCGR2A | 0.09 |
| ADRBK21 | 1.03E-47 | 0.67 | 0.44 | 0.05 | 2.39E-43 | Monocyte4 | ADRBK2 | 0.05 |
| MOB3B1 | 2.04E-43 | 0.74 | 0.46 | 0.06 | 4.75E-39 | Monocyte4 | MOB3B | 0.06 |
| RASGEF1B2 | 1.47E-41 | 1.02 | 0.47 | 0.07 | 3.42E-37 | Monocyte4 | RASGEF1B | 0.07 |
| KCNMB11 | 4.08E-41 | 0.55 | 0.44 | 0.06 | 9.47E-37 | Monocyte4 | KCNMB1 | 0.06 |
| NFKBID1 | 8.12E-41 | 0.70 | 0.57 | 0.10 | 1.88E-36 | Monocyte4 | NFKBID | 0.10 |
| IFI303 | 7.60E-39 | 1.07 | 0.50 | 0.08 | 1.77E-34 | Monocyte4 | IFI30 | 0.08 |
| HHEX3 | 1.58E-36 | 0.51 | 0.41 | 0.06 | 3.68E-32 | Monocyte4 | HHEX | 0.06 |
| MS4A6A4 | 5.18E-36 | 1.13 | 0.53 | 0.09 | 1.20E-31 | Monocyte4 | MS4A6A | 0.09 |
| RGS121 | 1.52E-34 | 0.65 | 0.44 | 0.07 | 3.52E-30 | Monocyte4 | RGS12 | 0.07 |
| HLA-DOA5 | 5.30E-32 | 0.68 | 0.47 | 0.08 | 1.23E-27 | Monocyte4 | HLA-DOA | 0.08 |
| RPP25 | 1.10E-30 | 0.55 | 0.44 | 0.08 | 2.55E-26 | Monocyte4 | RPP25 | 0.08 |
| PDE4A1 | 5.81E-29 | 0.63 | 0.47 | 0.09 | 1.35E-24 | Monocyte4 | PDE4A | 0.09 |
| FCGR2B4 | 2.47E-28 | 0.58 | 0.44 | 0.08 | 5.73E-24 | Monocyte4 | FCGR2B | 0.08 |
| LRRK11 | 2.28E-27 | 0.52 | 0.44 | 0.09 | 5.30E-23 | Monocyte4 | LRRK1 | 0.09 |
| IL18BP2 | 1.01E-25 | 0.68 | 0.44 | 0.09 | 2.34E-21 | Monocyte4 | IL18BP | 0.09 |
| CYBB6 | 4.05E-25 | 0.37 | 0.49 | 0.09 | 9.41E-21 | Monocyte4 | CYBB | 0.10 |
| EGLN35 | 3.28E-23 | 1.05 | 0.43 | 0.10 | 7.62E-19 | Monocyte4 | EGLN3 | 0.10 |
| SYK7 | 1.15E-21 | 0.47 | 0.44 | 0.10 | 2.67E-17 | Monocyte4 | SYK | 0.10 |
| TESPA11 | 2.89E-21 | 0.42 | 0.41 | 0.08 | 6.72E-17 | Monocyte4 | TESPA1 | 0.08 |
| ATPAF2 | 8.84E-21 | 0.47 | 0.41 | 0.09 | 2.05E-16 | Monocyte4 | ATPAF2 | 0.09 |
| ST147 | 6.17E-20 | 0.44 | 0.41 | 0.09 | 1.43E-15 | Monocyte4 | ST14 | 0.09 |
| CCL221 | 0 | 3.99 | 0.42 | 0.00 | 0 | Monocyte5 | CCL22 | 0.01 |
| CCL19 | 0 | 3.43 | 0.79 | 0.02 | 0 | Monocyte5 | CCL19 | 0.02 |
| BCL2L141 | 0 | 1.69 | 0.65 | 0.01 | 0 | Monocyte5 | BCL2L14 | 0.01 |
| SLCO5A1 | 0 | 1.51 | 0.58 | 0.01 | 0 | Monocyte5 | SLCO5A1 | 0.01 |
| FLT3 | 0 | 1.49 | 0.54 | 0.01 | 0 | Monocyte5 | FLT3 | 0.01 |
| HMSD | 0 | 1.08 | 0.49 | 0.01 | 0 | Monocyte5 | HMSD | 0.01 |
| TVP23A | 0 | 1.01 | 0.51 | 0.01 | 0 | Monocyte5 | TVP23A | 0.01 |
| LAMP3 | 1.27E-306 | 3.82 | 1.00 | 0.03 | 2.94E-302 | Monocyte5 | LAMP3 | 0.03 |
| IDO11 | 1.65E-230 | 3.33 | 0.81 | 0.03 | 3.83E-226 | Monocyte5 | IDO1 | 0.03 |
| NCCRP11 | 3.43E-169 | 2.28 | 0.42 | 0.01 | 7.97E-165 | Monocyte5 | NCCRP1 | 0.01 |
| ACHE | 1.95E-164 | 1.21 | 0.44 | 0.01 | 4.53E-160 | Monocyte5 | ACHE | 0.01 |
| CSF2RA5 | 1.06E-163 | 2.33 | 0.81 | 0.04 | 2.45E-159 | Monocyte5 | CSF2RA | 0.04 |
| EBI3 | 1.16E-113 | 3.60 | 0.54 | 0.02 | 2.69E-109 | Monocyte5 | EBI3 | 0.02 |
| LGALS21 | 7.61E-104 | 1.98 | 0.56 | 0.03 | 1.77E-99 | Monocyte5 | LGALS2 | 0.03 |
| PDCD1LG2 | 7.14E-99 | 1.14 | 0.56 | 0.03 | 1.66E-94 | Monocyte5 | PDCD1LG2 | 0.03 |
| ANKRD33B | 6.88E-96 | 0.86 | 0.42 | 0.02 | 1.60E-91 | Monocyte5 | ANKRD33B | 0.02 |
| GPR157 | 1.59E-94 | 1.59 | 0.58 | 0.03 | 3.68E-90 | Monocyte5 | GPR157 | 0.03 |
| RASSF44 | 1.98E-89 | 3.04 | 0.91 | 0.09 | 4.60E-85 | Monocyte5 | RASSF4 | 0.09 |
| ARHGAP22 | 5.40E-77 | 1.36 | 0.54 | 0.03 | 1.25E-72 | Monocyte5 | ARHGAP22 | 0.03 |
| IL15 | 6.28E-75 | 1.49 | 0.65 | 0.05 | 1.46E-70 | Monocyte5 | IL15 | 0.05 |
| CLIC22 | 2.16E-72 | 1.51 | 0.67 | 0.06 | 5.01E-68 | Monocyte5 | CLIC2 | 0.06 |
| DAPP16 | 1.02E-64 | 2.04 | 0.81 | 0.10 | 2.37E-60 | Monocyte5 | DAPP1 | 0.10 |
| CXCL91 | 1.89E-54 | 2.35 | 0.56 | 0.05 | 4.40E-50 | Monocyte5 | CXCL9 | 0.05 |
| TMCC31 | 1.56E-53 | 0.77 | 0.42 | 0.03 | 3.63E-49 | Monocyte5 | TMCC3 | 0.03 |
| KYNU5 | 1.95E-49 | 1.34 | 0.61 | 0.06 | 4.52E-45 | Monocyte5 | KYNU | 0.06 |
| CD864 | 2.43E-49 | 1.42 | 0.65 | 0.07 | 5.65E-45 | Monocyte5 | CD86 | 0.07 |
| FAM49A4 | 1.21E-48 | 1.66 | 0.65 | 0.08 | 2.80E-44 | Monocyte5 | FAM49A | 0.08 |
| LY75 | 3.40E-48 | 1.40 | 0.63 | 0.07 | 7.90E-44 | Monocyte5 | LY75 | 0.07 |
| TBC1D81 | 3.35E-47 | 1.87 | 0.61 | 0.07 | 7.78E-43 | Monocyte5 | TBC1D8 | 0.07 |
| TTYH2 | 2.61E-46 | 0.85 | 0.42 | 0.03 | 6.06E-42 | Monocyte5 | TTYH2 | 0.03 |
| ADORA2A | 3.59E-46 | 1.05 | 0.42 | 0.03 | 8.33E-42 | Monocyte5 | ADORA2A | 0.03 |
| DUSP51 | 4.64E-45 | 1.74 | 0.58 | 0.07 | 1.08E-40 | Monocyte5 | DUSP5 | 0.07 |
| NUAK2 | 1.91E-44 | 0.92 | 0.51 | 0.05 | 4.43E-40 | Monocyte5 | NUAK2 | 0.05 |
| ETV3 | 2.74E-44 | 1.72 | 0.67 | 0.09 | 6.35E-40 | Monocyte5 | ETV3 | 0.09 |
| MREG1 | 1.53E-42 | 0.99 | 0.51 | 0.05 | 3.56E-38 | Monocyte5 | MREG | 0.05 |
| LAD13 | 1.78E-42 | 1.79 | 0.58 | 0.07 | 4.14E-38 | Monocyte5 | LAD1 | 0.07 |
| LRRK12 | 1.40E-38 | 1.41 | 0.61 | 0.09 | 3.25E-34 | Monocyte5 | LRRK1 | 0.09 |
| ARHGAP102 | 2.96E-38 | 1.63 | 0.63 | 0.09 | 6.86E-34 | Monocyte5 | ARHGAP10 | 0.09 |
| HCK4 | 7.52E-35 | 1.03 | 0.54 | 0.07 | 1.75E-30 | Monocyte5 | HCK | 0.07 |
| SNN | 7.60E-35 | 1.21 | 0.54 | 0.07 | 1.76E-30 | Monocyte5 | SNN | 0.07 |
| ST3GAL5 | 6.94E-32 | 0.92 | 0.54 | 0.07 | 1.61E-27 | Monocyte5 | ST3GAL5 | 0.07 |
| CSF2RB4 | 1.64E-31 | 0.79 | 0.44 | 0.05 | 3.80E-27 | Monocyte5 | CSF2RB | 0.05 |
| POGLUT1 | 2.40E-31 | 1.31 | 0.61 | 0.10 | 5.57E-27 | Monocyte5 | POGLUT1 | 0.10 |
| IRF86 | 7.99E-31 | 0.94 | 0.58 | 0.09 | 1.86E-26 | Monocyte5 | IRF8 | 0.09 |
| H2AFY21 | 5.84E-29 | 1.13 | 0.44 | 0.06 | 1.36E-24 | Monocyte5 | H2AFY2 | 0.06 |
| RASSF24 | 6.43E-29 | 1.23 | 0.58 | 0.09 | 1.49E-24 | Monocyte5 | RASSF2 | 0.09 |
| ABCC41 | 1.38E-28 | 0.65 | 0.42 | 0.05 | 3.21E-24 | Monocyte5 | ABCC4 | 0.05 |
| MAP3K14 | 2.05E-27 | 0.89 | 0.47 | 0.06 | 4.75E-23 | Monocyte5 | MAP3K14 | 0.07 |
| MMD | 7.20E-27 | 1.02 | 0.49 | 0.07 | 1.67E-22 | Monocyte5 | MMD | 0.07 |
| NFKBID2 | 5.62E-26 | 1.04 | 0.56 | 0.10 | 1.30E-21 | Monocyte5 | NFKBID | 0.10 |
| MOB1B1 | 2.01E-25 | 1.00 | 0.54 | 0.09 | 4.66E-21 | Monocyte5 | MOB1B | 0.09 |
| IL4I12 | 2.73E-25 | 1.11 | 0.47 | 0.07 | 6.33E-21 | Monocyte5 | IL4I1 | 0.07 |
| SYNPO21 | 5.18E-22 | 1.46 | 0.42 | 0.07 | 1.20E-17 | Monocyte5 | SYNPO2 | 0.07 |
| SNX111 | 3.47E-21 | 1.03 | 0.47 | 0.08 | 8.05E-17 | Monocyte5 | SNX11 | 0.08 |
| MNDA4 | 1.18E-19 | 0.85 | 0.47 | 0.08 | 2.73E-15 | Monocyte5 | MNDA | 0.08 |
| USP12 | 7.37E-19 | 0.86 | 0.47 | 0.09 | 1.71E-14 | Monocyte5 | USP12 | 0.09 |
| RAB304 | 2.27E-18 | 1.02 | 0.44 | 0.08 | 5.26E-14 | Monocyte5 | RAB30 | 0.08 |
| FARP2 | 3.14E-17 | 0.58 | 0.42 | 0.08 | 7.29E-13 | Monocyte5 | FARP2 | 0.08 |
| CSTA3 | 2.44E-15 | 1.15 | 0.42 | 0.09 | 5.68E-11 | Monocyte5 | CSTA | 0.09 |
| MOSPD2 | 1.26E-13 | 0.92 | 0.42 | 0.10 | 2.92E-09 | Monocyte5 | MOSPD2 | 0.10 |
| LPL | 0 | 3.40 | 1.00 | 0.02 | 0 | Monocyte6 | LPL | 0.02 |
| CHIT1 | 0 | 2.69 | 0.93 | 0.01 | 0 | Monocyte6 | CHIT1 | 0.01 |
| RBP4 | 0 | 1.87 | 0.63 | 0.00 | 0 | Monocyte6 | RBP4 | 0.00 |
| CAMK2B | 0 | 1.19 | 0.77 | 0.00 | 0 | Monocyte6 | CAMK2B | 0.00 |
| MS4A6E | 0 | 1.04 | 0.50 | 0.00 | 0 | Monocyte6 | MS4A6E | 0.00 |
| TM4SF19 | 0 | 0.95 | 0.70 | 0.00 | 0 | Monocyte6 | TM4SF19 | 0.01 |
| RP11-680A11.5 | 0 | 0.82 | 0.77 | 0.01 | 0 | Monocyte6 | RP11-680A11.5 | 0.01 |
| DNASE2B | 0 | 0.73 | 0.50 | 0.00 | 0 | Monocyte6 | DNASE2B | 0.00 |
| CD300LB | 0 | 0.72 | 0.60 | 0.01 | 0 | Monocyte6 | CD300LB | 0.01 |
| LINC01010 | 0 | 0.67 | 0.60 | 0.00 | 0 | Monocyte6 | LINC01010 | 0.00 |
| MYOZ1 | 0 | 0.67 | 0.63 | 0.00 | 0 | Monocyte6 | MYOZ1 | 0.01 |
| USP2 | 0 | 0.65 | 0.70 | 0.01 | 0 | Monocyte6 | USP2 | 0.01 |
| DCSTAMP | 0 | 0.40 | 0.47 | 0.00 | 0 | Monocyte6 | DCSTAMP | 0.00 |
| DHRS91 | 4.28E-307 | 1.11 | 0.80 | 0.01 | 9.93E-303 | Monocyte6 | DHRS9 | 0.01 |
| KCNJ5 | 1.81E-260 | 0.85 | 0.57 | 0.01 | 4.20E-256 | Monocyte6 | KCNJ5 | 0.01 |
| RP11-1008C21.1 | 1.17E-245 | 0.52 | 0.53 | 0.01 | 2.71E-241 | Monocyte6 | RP11-1008C21.1 | 0.01 |
| L3MBTL4-AS1 | 9.09E-240 | 0.61 | 0.63 | 0.01 | 2.11E-235 | Monocyte6 | L3MBTL4-AS1 | 0.01 |
| ASPHD1 | 2.56E-237 | 1.01 | 0.80 | 0.02 | 5.93E-233 | Monocyte6 | ASPHD1 | 0.02 |
| TNFRSF11A1 | 2.78E-218 | 1.03 | 0.87 | 0.02 | 6.45E-214 | Monocyte6 | TNFRSF11A | 0.02 |
| TMIGD3 | 2.96E-213 | 1.97 | 0.63 | 0.01 | 6.88E-209 | Monocyte6 | TMIGD3 | 0.01 |
| OTOA | 1.22E-210 | 1.34 | 0.77 | 0.02 | 2.84E-206 | Monocyte6 | OTOA | 0.02 |
| FAIM2 | 8.22E-207 | 1.01 | 0.73 | 0.02 | 1.91E-202 | Monocyte6 | FAIM2 | 0.02 |
| TNNI2 | 1.18E-200 | 0.85 | 0.77 | 0.02 | 2.73E-196 | Monocyte6 | TNNI2 | 0.02 |
| AQP91 | 7.22E-198 | 0.75 | 0.83 | 0.02 | 1.68E-193 | Monocyte6 | AQP9 | 0.02 |
| FABP3 | 1.87E-192 | 1.30 | 0.80 | 0.02 | 4.34E-188 | Monocyte6 | FABP3 | 0.02 |
| FABP41 | 8.64E-192 | 5.61 | 1.00 | 0.03 | 2.01E-187 | Monocyte6 | FABP4 | 0.04 |
| SPOCD1 | 6.54E-189 | 1.29 | 0.70 | 0.02 | 1.52E-184 | Monocyte6 | SPOCD1 | 0.02 |
| ZMIZ1-AS1 | 9.42E-188 | 0.49 | 0.57 | 0.01 | 2.19E-183 | Monocyte6 | ZMIZ1-AS1 | 0.01 |
| RAB7B | 2.07E-185 | 1.93 | 0.93 | 0.03 | 4.81E-181 | Monocyte6 | RAB7B | 0.03 |
| PLA2G72 | 3.64E-178 | 3.07 | 1.00 | 0.04 | 8.44E-174 | Monocyte6 | PLA2G7 | 0.04 |
| SCIN1 | 2.97E-172 | 0.98 | 0.67 | 0.02 | 6.90E-168 | Monocyte6 | SCIN | 0.02 |
| HK31 | 6.28E-169 | 1.08 | 0.83 | 0.03 | 1.46E-164 | Monocyte6 | HK3 | 0.03 |
| SIGLEC7 | 2.14E-166 | 0.89 | 0.80 | 0.02 | 4.97E-162 | Monocyte6 | SIGLEC7 | 0.02 |
| RASL11B | 3.26E-161 | 0.48 | 0.50 | 0.01 | 7.57E-157 | Monocyte6 | RASL11B | 0.01 |
| FCGBP1 | 1.36E-158 | 2.66 | 0.70 | 0.02 | 3.15E-154 | Monocyte6 | FCGBP | 0.02 |
| SLAMF91 | 6.59E-153 | 0.43 | 0.60 | 0.01 | 1.53E-148 | Monocyte6 | SLAMF9 | 0.01 |
| TMEM37 | 3.50E-152 | 1.30 | 0.87 | 0.03 | 8.13E-148 | Monocyte6 | TMEM37 | 0.03 |
| PAQR51 | 9.08E-144 | 0.35 | 0.43 | 0.01 | 2.11E-139 | Monocyte6 | PAQR5 | 0.01 |
| TREM23 | 5.89E-142 | 4.08 | 1.00 | 0.05 | 1.37E-137 | Monocyte6 | TREM2 | 0.05 |
| MMP92 | 8.30E-142 | 4.49 | 0.97 | 0.04 | 1.93E-137 | Monocyte6 | MMP9 | 0.04 |
| CD364 | 5.07E-137 | 4.78 | 1.00 | 0.05 | 1.18E-132 | Monocyte6 | CD36 | 0.05 |
| FOLR21 | 1.16E-134 | 1.25 | 0.70 | 0.02 | 2.69E-130 | Monocyte6 | FOLR2 | 0.02 |
| SIGLEC91 | 3.74E-129 | 0.90 | 0.77 | 0.03 | 8.69E-125 | Monocyte6 | SIGLEC9 | 0.03 |
| SUCNR11 | 6.18E-128 | 0.54 | 0.50 | 0.01 | 1.43E-123 | Monocyte6 | SUCNR1 | 0.01 |
| TM6SF13 | 1.12E-126 | 0.85 | 0.90 | 0.04 | 2.59E-122 | Monocyte6 | TM6SF1 | 0.04 |
| VSIG43 | 6.87E-123 | 1.33 | 0.90 | 0.04 | 1.60E-118 | Monocyte6 | VSIG4 | 0.04 |
| MS4A4A3 | 1.81E-115 | 2.00 | 0.93 | 0.05 | 4.21E-111 | Monocyte6 | MS4A4A | 0.05 |
| C5AR13 | 2.25E-113 | 1.69 | 0.90 | 0.05 | 5.23E-109 | Monocyte6 | C5AR1 | 0.05 |
| MMP191 | 3.71E-113 | 2.12 | 0.93 | 0.05 | 8.62E-109 | Monocyte6 | MMP19 | 0.05 |
| NFAM11 | 9.46E-112 | 0.55 | 0.67 | 0.02 | 2.20E-107 | Monocyte6 | NFAM1 | 0.02 |
| IL1RN2 | 5.99E-109 | 1.75 | 0.93 | 0.05 | 1.39E-104 | Monocyte6 | IL1RN | 0.05 |
| MME | 5.54E-108 | 1.12 | 0.70 | 0.03 | 1.29E-103 | Monocyte6 | MME | 0.03 |
| NCAPH | 1.54E-106 | 0.81 | 0.63 | 0.02 | 3.58E-102 | Monocyte6 | NCAPH | 0.02 |
| RAB42 | 5.76E-105 | 1.11 | 0.70 | 0.03 | 1.34E-100 | Monocyte6 | RAB42 | 0.03 |
| CD300C1 | 1.71E-104 | 0.80 | 0.67 | 0.03 | 3.97E-100 | Monocyte6 | CD300C | 0.03 |
| NPL3 | 3.81E-103 | 2.03 | 1.00 | 0.06 | 8.84E-99 | Monocyte6 | NPL | 0.06 |
| NCEH11 | 9.12E-102 | 1.92 | 0.87 | 0.05 | 2.12E-97 | Monocyte6 | NCEH1 | 0.05 |
| LINC012723 | 1.10E-100 | 2.02 | 1.00 | 0.06 | 2.56E-96 | Monocyte6 | LINC01272 | 0.07 |
| CD1802 | 9.62E-100 | 0.59 | 0.77 | 0.04 | 2.23E-95 | Monocyte6 | CD180 | 0.04 |
| APOC2 | 3.66E-97 | 0.51 | 0.43 | 0.01 | 8.51E-93 | Monocyte6 | APOC2 | 0.01 |
| MSR13 | 2.24E-96 | 1.91 | 0.90 | 0.05 | 5.20E-92 | Monocyte6 | MSR1 | 0.05 |
| ITGAX3 | 4.92E-96 | 1.98 | 0.87 | 0.05 | 1.14E-91 | Monocyte6 | ITGAX | 0.05 |
| STAC32 | 6.40E-95 | 0.96 | 0.70 | 0.03 | 1.49E-90 | Monocyte6 | STAC3 | 0.03 |
| LONRF3 | 9.73E-94 | 0.31 | 0.43 | 0.01 | 2.26E-89 | Monocyte6 | LONRF3 | 0.01 |
| ITGA3 | 1.92E-92 | 1.29 | 0.90 | 0.06 | 4.45E-88 | Monocyte6 | ITGA3 | 0.06 |
| PRAM11 | 1.22E-91 | 0.42 | 0.53 | 0.02 | 2.83E-87 | Monocyte6 | PRAM1 | 0.02 |
| SLC37A22 | 2.25E-90 | 0.78 | 0.67 | 0.03 | 5.22E-86 | Monocyte6 | SLC37A2 | 0.03 |
| GPC4 | 4.65E-90 | 1.02 | 0.73 | 0.04 | 1.08E-85 | Monocyte6 | GPC4 | 0.04 |
| C1QC3 | 1.07E-89 | 4.03 | 1.00 | 0.07 | 2.49E-85 | Monocyte6 | C1QC | 0.08 |
| MRC13 | 7.05E-89 | 0.58 | 0.67 | 0.03 | 1.64E-84 | Monocyte6 | MRC1 | 0.03 |
| SLCO2B14 | 8.24E-89 | 1.14 | 0.90 | 0.05 | 1.91E-84 | Monocyte6 | SLCO2B1 | 0.05 |
| CCRL21 | 2.95E-88 | 0.67 | 0.73 | 0.04 | 6.84E-84 | Monocyte6 | CCRL2 | 0.04 |
| C1QB3 | 5.33E-88 | 3.46 | 1.00 | 0.07 | 1.24E-83 | Monocyte6 | C1QB | 0.07 |
| GCLC | 1.08E-87 | 1.13 | 0.83 | 0.05 | 2.50E-83 | Monocyte6 | GCLC | 0.05 |
| EMILIN23 | 4.09E-86 | 1.28 | 0.93 | 0.06 | 9.49E-82 | Monocyte6 | EMILIN2 | 0.06 |
| DNAJB5 | 2.78E-84 | 0.46 | 0.60 | 0.03 | 6.46E-80 | Monocyte6 | DNAJB5 | 0.03 |
| NRROS2 | 3.67E-83 | 1.50 | 0.93 | 0.07 | 8.52E-79 | Monocyte6 | NRROS | 0.07 |
| C1QA3 | 3.35E-82 | 3.18 | 1.00 | 0.08 | 7.77E-78 | Monocyte6 | C1QA | 0.08 |
| LILRB44 | 5.36E-81 | 1.86 | 0.97 | 0.07 | 1.24E-76 | Monocyte6 | LILRB4 | 0.07 |
| CSF1R4 | 6.23E-81 | 1.94 | 0.93 | 0.07 | 1.45E-76 | Monocyte6 | CSF1R | 0.07 |
| CPM2 | 8.28E-81 | 1.70 | 0.93 | 0.07 | 1.92E-76 | Monocyte6 | CPM | 0.07 |
| FGR3 | 1.48E-80 | 1.39 | 0.90 | 0.06 | 3.43E-76 | Monocyte6 | FGR | 0.06 |
| LRRC253 | 2.02E-80 | 0.85 | 0.77 | 0.04 | 4.68E-76 | Monocyte6 | LRRC25 | 0.04 |
| CPVL5 | 2.39E-80 | 1.30 | 0.93 | 0.07 | 5.55E-76 | Monocyte6 | CPVL | 0.07 |
| GDF15 | 3.57E-79 | 0.42 | 0.47 | 0.02 | 8.29E-75 | Monocyte6 | GDF15 | 0.02 |
| PILRA4 | 3.61E-79 | 1.55 | 0.90 | 0.06 | 8.38E-75 | Monocyte6 | PILRA | 0.06 |
| CYP27A12 | 8.28E-79 | 2.51 | 0.97 | 0.08 | 1.92E-74 | Monocyte6 | CYP27A1 | 0.08 |
| AFAP1L11 | 1.02E-78 | 0.43 | 0.50 | 0.02 | 2.37E-74 | Monocyte6 | AFAP1L1 | 0.02 |
| IGSF65 | 1.69E-77 | 1.96 | 0.87 | 0.06 | 3.93E-73 | Monocyte6 | IGSF6 | 0.06 |
| SLC1A31 | 5.68E-77 | 0.83 | 0.77 | 0.05 | 1.32E-72 | Monocyte6 | SLC1A3 | 0.05 |
| MATK1 | 1.22E-74 | 2.51 | 1.00 | 0.09 | 2.82E-70 | Monocyte6 | MATK | 0.09 |
| HSD3B7 | 7.75E-74 | 1.78 | 0.97 | 0.09 | 1.80E-69 | Monocyte6 | HSD3B7 | 0.09 |
| SLC29A3 | 1.31E-72 | 0.94 | 0.80 | 0.05 | 3.04E-68 | Monocyte6 | SLC29A3 | 0.05 |
| CD1633 | 2.59E-72 | 0.90 | 0.80 | 0.05 | 6.01E-68 | Monocyte6 | CD163 | 0.05 |
| IFI305 | 1.16E-71 | 2.04 | 0.93 | 0.08 | 2.70E-67 | Monocyte6 | IFI30 | 0.08 |
| CXCL32 | 1.32E-70 | 1.35 | 0.60 | 0.03 | 3.05E-66 | Monocyte6 | CXCL3 | 0.03 |
| NCF24 | 2.15E-70 | 1.18 | 0.93 | 0.07 | 4.99E-66 | Monocyte6 | NCF2 | 0.07 |
| ADGRE23 | 1.65E-69 | 0.86 | 0.77 | 0.05 | 3.83E-65 | Monocyte6 | ADGRE2 | 0.05 |
| LILRB23 | 1.04E-68 | 0.69 | 0.77 | 0.05 | 2.41E-64 | Monocyte6 | LILRB2 | 0.05 |
| C3AR14 | 1.75E-68 | 1.21 | 0.83 | 0.06 | 4.07E-64 | Monocyte6 | C3AR1 | 0.06 |
| AC093627.10 | 8.87E-68 | 0.41 | 0.53 | 0.03 | 2.06E-63 | Monocyte6 | AC093627.10 | 0.03 |
| SLC38A61 | 2.68E-67 | 1.42 | 0.90 | 0.08 | 6.21E-63 | Monocyte6 | SLC38A6 | 0.08 |
| GPR344 | 8.30E-65 | 0.55 | 0.63 | 0.04 | 1.93E-60 | Monocyte6 | GPR34 | 0.04 |
| LILRA6 | 9.56E-65 | 0.49 | 0.47 | 0.02 | 2.22E-60 | Monocyte6 | LILRA6 | 0.02 |
| MS4A74 | 7.48E-64 | 1.67 | 1.00 | 0.09 | 1.74E-59 | Monocyte6 | MS4A7 | 0.09 |
| G0S21 | 1.53E-63 | 0.90 | 0.70 | 0.05 | 3.55E-59 | Monocyte6 | G0S2 | 0.05 |
| PDK44 | 2.01E-63 | 0.69 | 0.70 | 0.05 | 4.68E-59 | Monocyte6 | PDK4 | 0.05 |
| IL4I13 | 7.54E-63 | 0.83 | 0.87 | 0.07 | 1.75E-58 | Monocyte6 | IL4I1 | 0.07 |
| UBASH3B | 1.61E-62 | 0.92 | 0.77 | 0.06 | 3.74E-58 | Monocyte6 | UBASH3B | 0.06 |
| ADAP23 | 4.29E-61 | 1.16 | 0.87 | 0.07 | 9.96E-57 | Monocyte6 | ADAP2 | 0.07 |
| SLC1A41 | 1.28E-60 | 0.72 | 0.90 | 0.08 | 2.98E-56 | Monocyte6 | SLC1A4 | 0.08 |
| SLC15A33 | 4.31E-60 | 0.91 | 0.80 | 0.06 | 1.00E-55 | Monocyte6 | SLC15A3 | 0.06 |
| ALDH3B1 | 6.96E-60 | 0.54 | 0.67 | 0.04 | 1.62E-55 | Monocyte6 | ALDH3B1 | 0.04 |
| NR1H31 | 2.27E-59 | 1.26 | 0.90 | 0.09 | 5.27E-55 | Monocyte6 | NR1H3 | 0.09 |
| LILRB33 | 2.70E-58 | 0.70 | 0.63 | 0.04 | 6.27E-54 | Monocyte6 | LILRB3 | 0.04 |
| DFNA5 | 9.73E-58 | 0.69 | 0.53 | 0.03 | 2.26E-53 | Monocyte6 | DFNA5 | 0.03 |
| MNDA5 | 2.00E-57 | 1.21 | 0.90 | 0.08 | 4.64E-53 | Monocyte6 | MNDA | 0.08 |
| LY866 | 2.96E-57 | 1.05 | 0.87 | 0.08 | 6.86E-53 | Monocyte6 | LY86 | 0.08 |
| PLA2G151 | 2.44E-56 | 0.71 | 0.80 | 0.07 | 5.65E-52 | Monocyte6 | PLA2G15 | 0.07 |
| P2RX71 | 8.87E-56 | 0.49 | 0.67 | 0.05 | 2.06E-51 | Monocyte6 | P2RX7 | 0.05 |
| MITF4 | 4.18E-55 | 1.15 | 0.90 | 0.09 | 9.70E-51 | Monocyte6 | MITF | 0.09 |
| ITGAM4 | 4.47E-55 | 0.61 | 0.73 | 0.06 | 1.04E-50 | Monocyte6 | ITGAM | 0.06 |
| BCAT15 | 1.17E-54 | 1.21 | 0.90 | 0.09 | 2.72E-50 | Monocyte6 | BCAT1 | 0.09 |
| UBTD12 | 1.96E-54 | 1.41 | 0.87 | 0.09 | 4.54E-50 | Monocyte6 | UBTD1 | 0.09 |
| SPRY21 | 3.94E-54 | 0.62 | 0.57 | 0.04 | 9.14E-50 | Monocyte6 | SPRY2 | 0.04 |
| RAB204 | 4.89E-54 | 1.11 | 0.83 | 0.08 | 1.13E-49 | Monocyte6 | RAB20 | 0.08 |
| SLAMF83 | 1.41E-53 | 0.76 | 0.70 | 0.05 | 3.27E-49 | Monocyte6 | SLAMF8 | 0.05 |
| RPS6KA21 | 1.46E-53 | 0.89 | 0.83 | 0.08 | 3.39E-49 | Monocyte6 | RPS6KA2 | 0.08 |
| RAMP1 | 6.39E-53 | 1.13 | 0.70 | 0.06 | 1.48E-48 | Monocyte6 | RAMP1 | 0.06 |
| SLC31A25 | 7.23E-53 | 1.15 | 0.90 | 0.09 | 1.68E-48 | Monocyte6 | SLC31A2 | 0.09 |
| ACE1 | 1.62E-52 | 0.84 | 0.67 | 0.05 | 3.76E-48 | Monocyte6 | ACE | 0.05 |
| SEZ6L23 | 1.42E-51 | 0.83 | 0.67 | 0.05 | 3.29E-47 | Monocyte6 | SEZ6L2 | 0.05 |
| SCIMP3 | 4.07E-51 | 0.64 | 0.63 | 0.05 | 9.44E-47 | Monocyte6 | SCIMP | 0.05 |
| SLC7A82 | 2.55E-50 | 0.72 | 0.70 | 0.06 | 5.92E-46 | Monocyte6 | SLC7A8 | 0.06 |
| IL186 | 3.88E-50 | 0.80 | 0.73 | 0.06 | 9.01E-46 | Monocyte6 | IL18 | 0.06 |
| SLC11A13 | 3.17E-49 | 1.06 | 0.73 | 0.06 | 7.37E-45 | Monocyte6 | SLC11A1 | 0.06 |
| CACNA2D41 | 7.01E-48 | 0.32 | 0.57 | 0.04 | 1.63E-43 | Monocyte6 | CACNA2D4 | 0.04 |
| SLC7A73 | 1.45E-47 | 0.90 | 0.80 | 0.08 | 3.37E-43 | Monocyte6 | SLC7A7 | 0.08 |
| SUSD11 | 2.03E-47 | 0.36 | 0.47 | 0.03 | 4.72E-43 | Monocyte6 | SUSD1 | 0.03 |
| SIGLEC12 | 7.27E-47 | 0.75 | 0.57 | 0.04 | 1.69E-42 | Monocyte6 | SIGLEC1 | 0.04 |
| SLC39A112 | 1.13E-46 | 0.75 | 0.80 | 0.08 | 2.61E-42 | Monocyte6 | SLC39A11 | 0.08 |
| NRIP3 | 1.50E-46 | 0.43 | 0.53 | 0.04 | 3.48E-42 | Monocyte6 | NRIP3 | 0.04 |
| CMKLR12 | 1.04E-45 | 0.45 | 0.50 | 0.03 | 2.42E-41 | Monocyte6 | CMKLR1 | 0.03 |
| SDS1 | 3.84E-45 | 0.48 | 0.50 | 0.03 | 8.92E-41 | Monocyte6 | SDS | 0.03 |
| CD300A6 | 6.60E-45 | 0.96 | 0.83 | 0.09 | 1.53E-40 | Monocyte6 | CD300A | 0.09 |
| TLR42 | 6.98E-45 | 0.38 | 0.60 | 0.05 | 1.62E-40 | Monocyte6 | TLR4 | 0.05 |
| BTK7 | 9.42E-45 | 0.52 | 0.77 | 0.07 | 2.19E-40 | Monocyte6 | BTK | 0.07 |
| C19orf38 | 3.10E-44 | 0.74 | 0.53 | 0.04 | 7.19E-40 | Monocyte6 | C19orf38 | 0.04 |
| MREG2 | 4.02E-44 | 0.53 | 0.63 | 0.05 | 9.33E-40 | Monocyte6 | MREG | 0.05 |
| PLEKHO23 | 4.18E-44 | 0.78 | 0.77 | 0.08 | 9.71E-40 | Monocyte6 | PLEKHO2 | 0.08 |
| GATM4 | 8.58E-44 | 0.51 | 0.57 | 0.04 | 1.99E-39 | Monocyte6 | GATM | 0.04 |
| PSEN21 | 1.36E-43 | 1.00 | 0.70 | 0.07 | 3.15E-39 | Monocyte6 | PSEN2 | 0.07 |
| ARHGAP103 | 5.83E-43 | 1.25 | 0.80 | 0.09 | 1.35E-38 | Monocyte6 | ARHGAP10 | 0.09 |
| TNFSF133 | 2.20E-42 | 0.71 | 0.70 | 0.07 | 5.11E-38 | Monocyte6 | TNFSF13 | 0.07 |
| TBXAS14 | 2.61E-42 | 0.75 | 0.73 | 0.07 | 6.06E-38 | Monocyte6 | TBXAS1 | 0.07 |
| FAM20C1 | 4.02E-42 | 0.95 | 0.80 | 0.09 | 9.33E-38 | Monocyte6 | FAM20C | 0.09 |
| TBC1D82 | 5.26E-42 | 0.81 | 0.70 | 0.07 | 1.22E-37 | Monocyte6 | TBC1D8 | 0.07 |
| FCGR3A3 | 5.41E-41 | 1.18 | 0.80 | 0.08 | 1.26E-36 | Monocyte6 | FCGR3A | 0.08 |
| SLC2A5 | 7.48E-41 | 0.32 | 0.47 | 0.03 | 1.74E-36 | Monocyte6 | SLC2A5 | 0.03 |
| P2RY11 | 1.54E-40 | 0.30 | 0.43 | 0.03 | 3.59E-36 | Monocyte6 | P2RY11 | 0.03 |
| C10orf116 | 2.96E-40 | 0.44 | 0.77 | 0.08 | 6.88E-36 | Monocyte6 | C10orf11 | 0.08 |
| DOK34 | 3.40E-40 | 0.49 | 0.67 | 0.06 | 7.89E-36 | Monocyte6 | DOK3 | 0.06 |
| CSF3R2 | 4.39E-40 | 0.51 | 0.60 | 0.05 | 1.02E-35 | Monocyte6 | CSF3R | 0.05 |
| ARHGAP221 | 8.56E-39 | 0.43 | 0.47 | 0.03 | 1.99E-34 | Monocyte6 | ARHGAP22 | 0.03 |
| TMEM206 | 2.07E-38 | 0.55 | 0.67 | 0.07 | 4.80E-34 | Monocyte6 | TMEM206 | 0.07 |
| CD335 | 4.17E-38 | 0.40 | 0.50 | 0.04 | 9.67E-34 | Monocyte6 | CD33 | 0.04 |
| SLC26A11 | 1.04E-37 | 0.38 | 0.63 | 0.06 | 2.41E-33 | Monocyte6 | SLC26A11 | 0.06 |
| MFSD7 | 1.81E-37 | 0.54 | 0.53 | 0.05 | 4.21E-33 | Monocyte6 | MFSD7 | 0.05 |
| C21 | 4.85E-37 | 0.49 | 0.57 | 0.05 | 1.13E-32 | Monocyte6 | C2 | 0.05 |
| TMEM38B | 5.63E-37 | 0.42 | 0.73 | 0.08 | 1.31E-32 | Monocyte6 | TMEM38B | 0.08 |
| DMXL24 | 8.28E-37 | 0.71 | 0.73 | 0.08 | 1.92E-32 | Monocyte6 | DMXL2 | 0.08 |
| LIMK11 | 7.09E-36 | 0.65 | 0.77 | 0.09 | 1.65E-31 | Monocyte6 | LIMK1 | 0.09 |
| HAAO | 8.34E-36 | 0.68 | 0.50 | 0.04 | 1.94E-31 | Monocyte6 | HAAO | 0.04 |
| SYK8 | 1.40E-35 | 0.81 | 0.80 | 0.10 | 3.24E-31 | Monocyte6 | SYK | 0.10 |
| TIGAR2 | 1.92E-35 | 0.74 | 0.77 | 0.09 | 4.46E-31 | Monocyte6 | TIGAR | 0.09 |
| CLDN23 | 2.10E-35 | 0.41 | 0.50 | 0.04 | 4.88E-31 | Monocyte6 | CLDN23 | 0.04 |
| SLC36A1 | 3.84E-35 | 0.33 | 0.53 | 0.05 | 8.93E-31 | Monocyte6 | SLC36A1 | 0.05 |
| SPRED13 | 1.12E-34 | 0.82 | 0.77 | 0.10 | 2.59E-30 | Monocyte6 | SPRED1 | 0.10 |
| RASGRP33 | 5.11E-34 | 0.38 | 0.60 | 0.06 | 1.19E-29 | Monocyte6 | RASGRP3 | 0.06 |
| FCGR2A4 | 3.20E-33 | 0.69 | 0.77 | 0.09 | 7.43E-29 | Monocyte6 | FCGR2A | 0.09 |
| EGR21 | 5.58E-33 | 0.43 | 0.60 | 0.06 | 1.30E-28 | Monocyte6 | EGR2 | 0.06 |
| ST148 | 9.17E-33 | 0.73 | 0.73 | 0.09 | 2.13E-28 | Monocyte6 | ST14 | 0.09 |
| WDFY41 | 1.04E-32 | 0.43 | 0.43 | 0.03 | 2.42E-28 | Monocyte6 | WDFY4 | 0.03 |
| PI4K2A | 2.24E-32 | 0.38 | 0.53 | 0.05 | 5.21E-28 | Monocyte6 | PI4K2A | 0.05 |
| TSPAN155 | 3.39E-32 | 0.64 | 0.73 | 0.09 | 7.87E-28 | Monocyte6 | TSPAN15 | 0.09 |
| RRAGD1 | 3.54E-32 | 0.43 | 0.43 | 0.04 | 8.21E-28 | Monocyte6 | RRAGD | 0.04 |
| FPR34 | 1.36E-31 | 0.37 | 0.60 | 0.06 | 3.16E-27 | Monocyte6 | FPR3 | 0.06 |
| CYBB7 | 1.61E-31 | 0.65 | 0.77 | 0.09 | 3.73E-27 | Monocyte6 | CYBB | 0.10 |
| CCR13 | 1.69E-31 | 0.44 | 0.67 | 0.07 | 3.93E-27 | Monocyte6 | CCR1 | 0.07 |
| ITSN12 | 1.83E-31 | 0.79 | 0.70 | 0.09 | 4.24E-27 | Monocyte6 | ITSN1 | 0.09 |
| GAS74 | 5.08E-31 | 0.94 | 0.70 | 0.09 | 1.18E-26 | Monocyte6 | GAS7 | 0.09 |
| FAM101B2 | 5.80E-31 | 0.53 | 0.60 | 0.07 | 1.35E-26 | Monocyte6 | FAM101B | 0.07 |
| RENBP4 | 7.74E-30 | 0.44 | 0.60 | 0.07 | 1.80E-25 | Monocyte6 | RENBP | 0.07 |
| SLC9A71 | 1.41E-29 | 0.46 | 0.50 | 0.05 | 3.26E-25 | Monocyte6 | SLC9A7 | 0.05 |
| SLC8A14 | 2.20E-29 | 0.45 | 0.53 | 0.05 | 5.11E-25 | Monocyte6 | SLC8A1 | 0.05 |
| LILRB13 | 3.90E-29 | 0.41 | 0.60 | 0.07 | 9.06E-25 | Monocyte6 | LILRB1 | 0.07 |
| GALNT63 | 4.41E-29 | 0.51 | 0.67 | 0.08 | 1.02E-24 | Monocyte6 | GALNT6 | 0.08 |
| FCHO22 | 1.45E-28 | 0.68 | 0.67 | 0.09 | 3.38E-24 | Monocyte6 | FCHO2 | 0.09 |
| RASGEF1B3 | 1.66E-28 | 0.40 | 0.60 | 0.07 | 3.85E-24 | Monocyte6 | RASGEF1B | 0.07 |
| SHMT1 | 7.72E-28 | 0.59 | 0.60 | 0.07 | 1.79E-23 | Monocyte6 | SHMT1 | 0.07 |
| RP11-124N14.3 | 7.96E-28 | 1.26 | 0.60 | 0.07 | 1.85E-23 | Monocyte6 | RP11-124N14.3 | 0.07 |
| ZNF438 | 1.41E-27 | 0.29 | 0.53 | 0.06 | 3.27E-23 | Monocyte6 | ZNF438 | 0.06 |
| TGM22 | 4.88E-27 | 0.51 | 0.57 | 0.07 | 1.13E-22 | Monocyte6 | TGM2 | 0.07 |
| PIK3AP16 | 7.58E-27 | 0.27 | 0.67 | 0.08 | 1.76E-22 | Monocyte6 | PIK3AP1 | 0.08 |
| CHST151 | 8.81E-27 | 0.67 | 0.67 | 0.09 | 2.05E-22 | Monocyte6 | CHST15 | 0.09 |
| RASSF45 | 9.14E-27 | 0.96 | 0.67 | 0.09 | 2.12E-22 | Monocyte6 | RASSF4 | 0.09 |
| CA23 | 9.41E-27 | 0.54 | 0.70 | 0.09 | 2.18E-22 | Monocyte6 | CA2 | 0.09 |
| ADPRH | 9.82E-27 | 0.46 | 0.47 | 0.05 | 2.28E-22 | Monocyte6 | ADPRH | 0.05 |
| MMD1 | 1.49E-26 | 0.34 | 0.60 | 0.07 | 3.45E-22 | Monocyte6 | MMD | 0.07 |
| ARRB11 | 1.53E-26 | 0.37 | 0.63 | 0.08 | 3.56E-22 | Monocyte6 | ARRB1 | 0.08 |
| FNIP23 | 2.12E-26 | 0.49 | 0.67 | 0.09 | 4.92E-22 | Monocyte6 | FNIP2 | 0.09 |
| IRF87 | 2.27E-26 | 0.34 | 0.67 | 0.09 | 5.26E-22 | Monocyte6 | IRF8 | 0.09 |
| SH2B35 | 4.12E-26 | 0.43 | 0.63 | 0.08 | 9.58E-22 | Monocyte6 | SH2B3 | 0.08 |
| ST3GAL51 | 5.46E-26 | 0.26 | 0.60 | 0.07 | 1.27E-21 | Monocyte6 | ST3GAL5 | 0.07 |
| STEAP32 | 1.83E-25 | 0.44 | 0.57 | 0.07 | 4.25E-21 | Monocyte6 | STEAP3 | 0.07 |
| CPT2 | 5.26E-25 | 0.42 | 0.57 | 0.07 | 1.22E-20 | Monocyte6 | CPT2 | 0.07 |
| TFEC3 | 6.48E-25 | 0.30 | 0.47 | 0.05 | 1.50E-20 | Monocyte6 | TFEC | 0.05 |
| HCK5 | 1.27E-24 | 0.27 | 0.57 | 0.07 | 2.94E-20 | Monocyte6 | HCK | 0.07 |
| PTGS15 | 1.70E-24 | 0.27 | 0.47 | 0.05 | 3.95E-20 | Monocyte6 | PTGS1 | 0.05 |
| SLC17A92 | 2.73E-24 | 0.29 | 0.47 | 0.05 | 6.33E-20 | Monocyte6 | SLC17A9 | 0.05 |
| TMEM164 | 4.08E-24 | 0.33 | 0.47 | 0.05 | 9.48E-20 | Monocyte6 | TMEM164 | 0.05 |
| SLC8B1 | 4.35E-24 | 0.30 | 0.63 | 0.09 | 1.01E-19 | Monocyte6 | SLC8B1 | 0.09 |
| TLR12 | 1.25E-23 | 0.29 | 0.47 | 0.05 | 2.89E-19 | Monocyte6 | TLR1 | 0.05 |
| ANPEP4 | 1.43E-23 | 0.63 | 0.53 | 0.07 | 3.32E-19 | Monocyte6 | ANPEP | 0.07 |
| IL18BP3 | 1.05E-22 | 0.37 | 0.63 | 0.09 | 2.45E-18 | Monocyte6 | IL18BP | 0.09 |
| KLHL18 | 1.53E-22 | 0.41 | 0.63 | 0.09 | 3.55E-18 | Monocyte6 | KLHL18 | 0.09 |
| PRKAR1B1 | 3.69E-22 | 0.44 | 0.60 | 0.09 | 8.58E-18 | Monocyte6 | PRKAR1B | 0.09 |
| EMILIN12 | 4.08E-22 | 0.40 | 0.67 | 0.10 | 9.47E-18 | Monocyte6 | EMILIN1 | 0.10 |
| TMEM53 | 5.70E-22 | 0.27 | 0.47 | 0.05 | 1.32E-17 | Monocyte6 | TMEM53 | 0.05 |
| HDAC92 | 1.54E-21 | 0.32 | 0.47 | 0.06 | 3.58E-17 | Monocyte6 | HDAC9 | 0.06 |
| PADI22 | 1.68E-21 | 0.29 | 0.47 | 0.06 | 3.90E-17 | Monocyte6 | PADI2 | 0.06 |
| ARHGAP314 | 4.25E-21 | 0.36 | 0.60 | 0.09 | 9.87E-17 | Monocyte6 | ARHGAP31 | 0.09 |
| STAB14 | 4.40E-21 | 0.34 | 0.50 | 0.06 | 1.02E-16 | Monocyte6 | STAB1 | 0.06 |
| ETV53 | 4.43E-21 | 0.34 | 0.57 | 0.08 | 1.03E-16 | Monocyte6 | ETV5 | 0.08 |
| SLC2A82 | 7.43E-21 | 0.45 | 0.57 | 0.08 | 1.73E-16 | Monocyte6 | SLC2A8 | 0.08 |
| IRF52 | 1.28E-20 | 0.35 | 0.53 | 0.07 | 2.97E-16 | Monocyte6 | IRF5 | 0.07 |
| C1orf544 | 1.59E-20 | 0.42 | 0.60 | 0.09 | 3.68E-16 | Monocyte6 | C1orf54 | 0.09 |
| RNASE66 | 2.34E-20 | 0.53 | 0.60 | 0.09 | 5.44E-16 | Monocyte6 | RNASE6 | 0.09 |
| LPCAT26 | 2.99E-20 | 0.31 | 0.63 | 0.10 | 6.95E-16 | Monocyte6 | LPCAT2 | 0.10 |
| NLN | 3.94E-20 | 0.42 | 0.43 | 0.05 | 9.14E-16 | Monocyte6 | NLN | 0.05 |
| BHLHE412 | 5.50E-20 | 0.59 | 0.57 | 0.09 | 1.28E-15 | Monocyte6 | BHLHE41 | 0.09 |
| SLC30A1 | 6.21E-20 | 0.31 | 0.50 | 0.07 | 1.44E-15 | Monocyte6 | SLC30A1 | 0.07 |
| PLCB22 | 7.61E-20 | 0.52 | 0.57 | 0.08 | 1.77E-15 | Monocyte6 | PLCB2 | 0.08 |
| NAA16 | 9.54E-20 | 0.53 | 0.60 | 0.10 | 2.21E-15 | Monocyte6 | NAA16 | 0.10 |
| CD865 | 1.76E-19 | 0.26 | 0.53 | 0.07 | 4.09E-15 | Monocyte6 | CD86 | 0.07 |
| CYP51A11 | 2.00E-19 | 0.53 | 0.60 | 0.10 | 4.65E-15 | Monocyte6 | CYP51A1 | 0.10 |
| PDE8A1 | 4.00E-19 | 0.25 | 0.53 | 0.08 | 9.28E-15 | Monocyte6 | PDE8A | 0.08 |
| METRNL4 | 6.49E-19 | 0.26 | 0.57 | 0.08 | 1.51E-14 | Monocyte6 | METRNL | 0.08 |
| C9orf722 | 2.37E-18 | 0.41 | 0.47 | 0.06 | 5.51E-14 | Monocyte6 | C9orf72 | 0.06 |
| SLC37A4 | 2.68E-18 | 0.36 | 0.47 | 0.07 | 6.22E-14 | Monocyte6 | SLC37A4 | 0.07 |
| ASRGL11 | 2.89E-18 | 0.31 | 0.43 | 0.06 | 6.72E-14 | Monocyte6 | ASRGL1 | 0.06 |
| FGD42 | 2.92E-18 | 0.43 | 0.47 | 0.07 | 6.79E-14 | Monocyte6 | FGD4 | 0.07 |
| SH3TC13 | 3.25E-18 | 0.31 | 0.50 | 0.07 | 7.54E-14 | Monocyte6 | SH3TC1 | 0.07 |
| BACE11 | 6.24E-18 | 0.34 | 0.47 | 0.07 | 1.45E-13 | Monocyte6 | BACE1 | 0.07 |
| SNX241 | 6.40E-18 | 0.37 | 0.50 | 0.08 | 1.49E-13 | Monocyte6 | SNX24 | 0.08 |
| ST3GAL64 | 8.82E-18 | 0.29 | 0.47 | 0.07 | 2.05E-13 | Monocyte6 | ST3GAL6 | 0.07 |
| NAIP2 | 1.39E-17 | 0.26 | 0.57 | 0.09 | 3.24E-13 | Monocyte6 | NAIP | 0.09 |
| GALE | 2.73E-17 | 0.51 | 0.53 | 0.09 | 6.34E-13 | Monocyte6 | GALE | 0.09 |
| CD1092 | 3.43E-17 | 0.52 | 0.57 | 0.10 | 7.97E-13 | Monocyte6 | CD109 | 0.10 |
| FES3 | 6.10E-17 | 0.26 | 0.50 | 0.08 | 1.42E-12 | Monocyte6 | FES | 0.08 |
| CLMP2 | 1.49E-16 | 0.48 | 0.47 | 0.07 | 3.45E-12 | Monocyte6 | CLMP | 0.07 |
| SVIL-AS1 | 1.99E-16 | 0.32 | 0.50 | 0.08 | 4.63E-12 | Monocyte6 | SVIL-AS1 | 0.08 |
| TMEM2201 | 2.42E-16 | 0.26 | 0.50 | 0.08 | 5.62E-12 | Monocyte6 | TMEM220 | 0.08 |
| SLC25A20 | 2.49E-16 | 0.26 | 0.43 | 0.06 | 5.78E-12 | Monocyte6 | SLC25A20 | 0.06 |
| HAUS2 | 2.57E-16 | 0.30 | 0.50 | 0.08 | 5.97E-12 | Monocyte6 | HAUS2 | 0.08 |
| DOCK51 | 2.59E-16 | 0.37 | 0.47 | 0.07 | 6.01E-12 | Monocyte6 | DOCK5 | 0.07 |
| FADS1 | 7.47E-16 | 0.48 | 0.53 | 0.10 | 1.73E-11 | Monocyte6 | FADS1 | 0.10 |
| PC1 | 1.83E-15 | 0.26 | 0.43 | 0.07 | 4.26E-11 | Monocyte6 | PC | 0.07 |
| TMEM2512 | 1.98E-15 | 0.38 | 0.53 | 0.10 | 4.59E-11 | Monocyte6 | TMEM251 | 0.10 |
| KLF71 | 6.85E-15 | 0.36 | 0.50 | 0.09 | 1.59E-10 | Monocyte6 | KLF7 | 0.09 |
| FAM214B | 7.92E-15 | 0.25 | 0.47 | 0.08 | 1.84E-10 | Monocyte6 | FAM214B | 0.08 |
| CNRIP13 | 1.89E-14 | 0.28 | 0.47 | 0.08 | 4.39E-10 | Monocyte6 | CNRIP1 | 0.08 |
| B4GALT51 | 1.96E-13 | 0.31 | 0.47 | 0.08 | 4.54E-09 | Monocyte6 | B4GALT5 | 0.08 |
| CPT1A | 1.06E-12 | 0.34 | 0.43 | 0.08 | 2.46E-08 | Monocyte6 | CPT1A | 0.08 |
| CDK2AP13 | 3.19E-12 | 0.33 | 0.50 | 0.10 | 7.41E-08 | Monocyte6 | CDK2AP1 | 0.10 |
| ITPK1 | 4.14E-12 | 0.28 | 0.50 | 0.10 | 9.62E-08 | Monocyte6 | ITPK1 | 0.10 |
| MSH3 | 9.06E-12 | 0.27 | 0.50 | 0.10 | 2.10E-07 | Monocyte6 | MSH3 | 0.10 |
| SESN11 | 1.04E-11 | 0.36 | 0.47 | 0.09 | 2.41E-07 | Monocyte6 | SESN1 | 0.09 |
| ALG1 | 1.43E-09 | 0.35 | 0.43 | 0.10 | 3.32E-05 | Monocyte6 | ALG1 | 0.10 |
| TUBB2B | 0 | 1.96 | 0.72 | 0.01 | 0 | Neurons | TUBB2B | 0.01 |
| UCHL1 | 0 | 1.86 | 0.81 | 0.03 | 0 | Neurons | UCHL1 | 0.04 |
| NPB1 | 0 | 1.77 | 0.79 | 0.04 | 0 | Neurons | NPB | 0.04 |
| MLLT11 | 0 | 1.63 | 0.77 | 0.06 | 0 | Neurons | MLLT11 | 0.06 |
| SNCG2 | 0 | 1.61 | 0.77 | 0.05 | 0 | Neurons | SNCG | 0.05 |
| CR2 | 0 | 1.52 | 0.55 | 0.01 | 0 | Neurons | CR2 | 0.01 |
| LRRC75A | 0 | 1.39 | 0.58 | 0.02 | 0 | Neurons | LRRC75A | 0.02 |
| PAX6 | 0 | 1.30 | 0.67 | 0.02 | 0 | Neurons | PAX6 | 0.02 |
| PRAME1 | 0 | 1.20 | 0.70 | 0.03 | 0 | Neurons | PRAME | 0.04 |
| GAL | 0 | 1.06 | 0.57 | 0.02 | 0 | Neurons | GAL | 0.03 |
| MAEL | 0 | 0.97 | 0.59 | 0.00 | 0 | Neurons | MAEL | 0.01 |
| TDRD12 | 0 | 0.91 | 0.68 | 0.01 | 0 | Neurons | TDRD12 | 0.01 |
| PCOLCE2 | 0 | 0.90 | 0.60 | 0.02 | 0 | Neurons | PCOLCE2 | 0.02 |
| SPIB4 | 0 | 0.88 | 0.55 | 0.03 | 0 | Neurons | SPIB | 0.03 |
| LAMP51 | 0 | 0.86 | 0.59 | 0.03 | 0 | Neurons | LAMP5 | 0.03 |
| SYT11 | 0 | 0.79 | 0.54 | 0.02 | 0 | Neurons | SYT1 | 0.02 |
| PLEKHG6 | 0 | 0.75 | 0.51 | 0.02 | 0 | Neurons | PLEKHG6 | 0.02 |
| PDIA2 | 0 | 0.72 | 0.51 | 0.00 | 0 | Neurons | PDIA2 | 0.00 |
| PKP2 | 0 | 0.72 | 0.56 | 0.03 | 0 | Neurons | PKP2 | 0.03 |
| KCNJ12 | 0 | 0.64 | 0.44 | 0.00 | 0 | Neurons | KCNJ12 | 0.01 |
| FABP6 | 0 | 0.62 | 0.45 | 0.00 | 0 | Neurons | FABP6 | 0.00 |
| TAGLN31 | 0 | 0.61 | 0.46 | 0.00 | 0 | Neurons | TAGLN3 | 0.00 |
| CEACAM16 | 0 | 0.60 | 0.47 | 0.00 | 0 | Neurons | CEACAM16 | 0.00 |
| RP3-460G2.21 | 0 | 0.55 | 0.55 | 0.01 | 0 | Neurons | RP3-460G2.2 | 0.01 |
| ACTN2 | 0 | 0.55 | 0.48 | 0.00 | 0 | Neurons | ACTN2 | 0.01 |
| GNG4 | 0 | 0.55 | 0.44 | 0.01 | 0 | Neurons | GNG4 | 0.02 |
| CXCL5 | 0 | 0.50 | 0.43 | 0.00 | 0 | Neurons | CXCL5 | 0.01 |
| VASH2 | 0 | 0.48 | 0.45 | 0.01 | 0 | Neurons | VASH2 | 0.01 |
| HOXB9 | 0 | 0.47 | 0.41 | 0.00 | 0 | Neurons | HOXB9 | 0.01 |
| LMO3 | 0 | 0.43 | 0.41 | 0.01 | 0 | Neurons | LMO3 | 0.01 |
| SOX11 | 0 | 0.38 | 0.40 | 0.01 | 0 | Neurons | SOX11 | 0.01 |
| TPPP3 | 1.03E-297 | 1.15 | 0.54 | 0.03 | 2.39E-293 | Neurons | TPPP3 | 0.03 |
| MEX3A1 | 3.02E-258 | 0.55 | 0.54 | 0.04 | 7.01E-254 | Neurons | MEX3A | 0.04 |
| RP11-357H14.17 | 9.80E-258 | 0.42 | 0.47 | 0.03 | 2.28E-253 | Neurons | RP11-357H14.17 | 0.03 |
| CTXN12 | 3.93E-250 | 0.36 | 0.42 | 0.02 | 9.13E-246 | Neurons | CTXN1 | 0.02 |
| ABCA3 | 1.77E-241 | 0.53 | 0.47 | 0.03 | 4.11E-237 | Neurons | ABCA3 | 0.03 |
| KIAA01011 | 3.53E-239 | 1.49 | 0.59 | 0.05 | 8.19E-235 | Neurons | KIAA0101 | 0.05 |
| CENPV | 5.11E-237 | 1.45 | 0.71 | 0.07 | 1.19E-232 | Neurons | CENPV | 0.07 |
| CRABP12 | 1.97E-228 | 1.57 | 0.73 | 0.07 | 4.57E-224 | Neurons | CRABP1 | 0.08 |
| RP1-79C4.4 | 9.57E-219 | 0.51 | 0.41 | 0.02 | 2.22E-214 | Neurons | RP1-79C4.4 | 0.03 |
| RBP51 | 3.99E-198 | 0.78 | 0.41 | 0.03 | 9.26E-194 | Neurons | RBP5 | 0.03 |
| QPRT1 | 1.98E-192 | 0.87 | 0.63 | 0.07 | 4.60E-188 | Neurons | QPRT | 0.07 |
| DSCC1 | 1.60E-189 | 0.59 | 0.45 | 0.03 | 3.70E-185 | Neurons | DSCC1 | 0.03 |
| FAM84B5 | 2.48E-185 | 1.73 | 0.69 | 0.08 | 5.76E-181 | Neurons | FAM84B | 0.08 |
| BCAT16 | 1.12E-184 | 1.00 | 0.73 | 0.09 | 2.60E-180 | Neurons | BCAT1 | 0.09 |
| AKAP122 | 2.43E-181 | 0.82 | 0.60 | 0.06 | 5.64E-177 | Neurons | AKAP12 | 0.06 |
| E2F51 | 7.24E-181 | 0.36 | 0.41 | 0.03 | 1.68E-176 | Neurons | E2F5 | 0.03 |
| KLHL23 | 1.18E-175 | 0.48 | 0.51 | 0.04 | 2.74E-171 | Neurons | KLHL23 | 0.05 |
| DZIP1 | 9.08E-175 | 0.42 | 0.44 | 0.03 | 2.11E-170 | Neurons | DZIP1 | 0.04 |
| TMEM972 | 5.05E-171 | 0.85 | 0.61 | 0.07 | 1.17E-166 | Neurons | TMEM97 | 0.07 |
| HMGN52 | 3.93E-167 | 0.86 | 0.57 | 0.06 | 9.13E-163 | Neurons | HMGN5 | 0.06 |
| BCL7A2 | 2.04E-166 | 0.73 | 0.60 | 0.07 | 4.74E-162 | Neurons | BCL7A | 0.07 |
| FAM71E11 | 8.98E-166 | 0.48 | 0.47 | 0.04 | 2.09E-161 | Neurons | FAM71E1 | 0.04 |
| ROBO11 | 6.85E-161 | 0.80 | 0.55 | 0.06 | 1.59E-156 | Neurons | ROBO1 | 0.06 |
| MEST1 | 6.16E-160 | 0.67 | 0.55 | 0.06 | 1.43E-155 | Neurons | MEST | 0.06 |
| ANO9 | 2.53E-157 | 0.67 | 0.56 | 0.06 | 5.87E-153 | Neurons | ANO9 | 0.06 |
| PIR | 3.25E-157 | 0.61 | 0.52 | 0.05 | 7.55E-153 | Neurons | PIR | 0.06 |
| PLD6 | 1.22E-156 | 0.42 | 0.40 | 0.03 | 2.84E-152 | Neurons | PLD6 | 0.03 |
| OVOS21 | 1.30E-153 | 0.72 | 0.54 | 0.06 | 3.02E-149 | Neurons | OVOS2 | 0.06 |
| RASIP12 | 2.35E-153 | 0.44 | 0.48 | 0.04 | 5.45E-149 | Neurons | RASIP1 | 0.05 |
| IGFBP21 | 7.51E-152 | 0.76 | 0.59 | 0.07 | 1.74E-147 | Neurons | IGFBP2 | 0.07 |
| G0S22 | 8.13E-147 | 0.54 | 0.47 | 0.04 | 1.89E-142 | Neurons | G0S2 | 0.05 |
| FXYD62 | 2.79E-144 | 0.77 | 0.63 | 0.08 | 6.48E-140 | Neurons | FXYD6 | 0.08 |
| SYNPO22 | 7.86E-139 | 0.50 | 0.55 | 0.06 | 1.82E-134 | Neurons | SYNPO2 | 0.07 |
| ZNF90 | 9.00E-139 | 0.53 | 0.54 | 0.06 | 2.09E-134 | Neurons | ZNF90 | 0.06 |
| IBA57 | 5.81E-137 | 0.51 | 0.47 | 0.05 | 1.35E-132 | Neurons | IBA57 | 0.05 |
| LTBP11 | 4.05E-136 | 0.48 | 0.49 | 0.05 | 9.41E-132 | Neurons | LTBP1 | 0.06 |
| TET1 | 5.99E-135 | 0.35 | 0.45 | 0.04 | 1.39E-130 | Neurons | TET1 | 0.05 |
| PLCB41 | 5.17E-132 | 0.57 | 0.47 | 0.05 | 1.20E-127 | Neurons | PLCB4 | 0.05 |
| VANGL2 | 8.10E-128 | 0.30 | 0.45 | 0.05 | 1.88E-123 | Neurons | VANGL2 | 0.05 |
| RAMP11 | 2.63E-126 | 0.57 | 0.48 | 0.06 | 6.11E-122 | Neurons | RAMP1 | 0.06 |
| EMG13 | 3.33E-118 | 0.65 | 0.58 | 0.08 | 7.74E-114 | Neurons | EMG1 | 0.09 |
| DGAT21 | 2.70E-116 | 0.41 | 0.47 | 0.06 | 6.26E-112 | Neurons | DGAT2 | 0.06 |
| ATP11C2 | 4.13E-114 | 0.58 | 0.55 | 0.08 | 9.59E-110 | Neurons | ATP11C | 0.08 |
| CENPF1 | 1.76E-113 | 1.49 | 0.50 | 0.06 | 4.10E-109 | Neurons | CENPF | 0.07 |
| FADS11 | 1.27E-111 | 0.67 | 0.60 | 0.09 | 2.96E-107 | Neurons | FADS1 | 0.10 |
| CDCA7 | 4.09E-110 | 0.47 | 0.48 | 0.06 | 9.49E-106 | Neurons | CDCA7 | 0.06 |
| MOK | 9.31E-110 | 0.37 | 0.48 | 0.06 | 2.16E-105 | Neurons | MOK | 0.06 |
| FAM92A12 | 1.08E-109 | 0.52 | 0.59 | 0.09 | 2.50E-105 | Neurons | FAM92A1 | 0.09 |
| ASUN | 1.11E-109 | 0.68 | 0.60 | 0.09 | 2.57E-105 | Neurons | ASUN | 0.10 |
| PPAN1 | 1.37E-106 | 0.39 | 0.46 | 0.06 | 3.17E-102 | Neurons | PPAN | 0.06 |
| CSRP22 | 1.44E-106 | 0.37 | 0.57 | 0.08 | 3.34E-102 | Neurons | CSRP2 | 0.08 |
| C1orf53 | 3.86E-106 | 0.45 | 0.42 | 0.05 | 8.97E-102 | Neurons | C1orf53 | 0.05 |
| BEX22 | 7.05E-106 | 0.53 | 0.57 | 0.08 | 1.64E-101 | Neurons | BEX2 | 0.09 |
| DNAH141 | 9.79E-106 | 0.36 | 0.44 | 0.05 | 2.27E-101 | Neurons | DNAH14 | 0.05 |
| PSAT12 | 7.29E-105 | 0.60 | 0.54 | 0.08 | 1.69E-100 | Neurons | PSAT1 | 0.08 |
| ST20 | 6.24E-103 | 0.38 | 0.41 | 0.05 | 1.45E-98 | Neurons | ST20 | 0.05 |
| NES2 | 5.03E-102 | 0.48 | 0.44 | 0.05 | 1.17E-97 | Neurons | NES | 0.06 |
| CDKAL11 | 6.06E-102 | 0.80 | 0.52 | 0.08 | 1.41E-97 | Neurons | CDKAL1 | 0.08 |
| COL27A1 | 2.35E-99 | 0.45 | 0.47 | 0.06 | 5.45E-95 | Neurons | COL27A1 | 0.07 |
| RP11-295G20.23 | 4.30E-99 | 0.53 | 0.52 | 0.08 | 9.97E-95 | Neurons | RP11-295G20.2 | 0.08 |
| PEG102 | 4.50E-96 | 0.60 | 0.51 | 0.08 | 1.04E-91 | Neurons | PEG10 | 0.08 |
| FADS2 | 5.40E-96 | 0.48 | 0.52 | 0.08 | 1.25E-91 | Neurons | FADS2 | 0.08 |
| TSFM1 | 1.95E-94 | 0.79 | 0.57 | 0.10 | 4.52E-90 | Neurons | TSFM | 0.10 |
| KANK1 | 2.09E-93 | 0.31 | 0.48 | 0.07 | 4.86E-89 | Neurons | KANK1 | 0.07 |
| CLIP32 | 1.78E-91 | 0.34 | 0.44 | 0.06 | 4.14E-87 | Neurons | CLIP3 | 0.06 |
| PSPH | 3.89E-91 | 0.38 | 0.47 | 0.07 | 9.04E-87 | Neurons | PSPH | 0.07 |
| YARS2 | 5.30E-91 | 0.67 | 0.56 | 0.10 | 1.23E-86 | Neurons | YARS2 | 0.10 |
| TYMS1 | 1.04E-90 | 0.57 | 0.49 | 0.07 | 2.40E-86 | Neurons | TYMS | 0.08 |
| PKP11 | 2.37E-88 | 0.33 | 0.45 | 0.06 | 5.51E-84 | Neurons | PKP1 | 0.07 |
| SRGAP13 | 9.78E-85 | 0.56 | 0.52 | 0.09 | 2.27E-80 | Neurons | SRGAP1 | 0.09 |
| DBP | 6.17E-83 | 0.38 | 0.51 | 0.08 | 1.43E-78 | Neurons | DBP | 0.09 |
| TMEM65 | 9.62E-78 | 0.35 | 0.47 | 0.07 | 2.23E-73 | Neurons | TMEM65 | 0.08 |
| RRAS2 | 5.67E-74 | 0.25 | 0.44 | 0.07 | 1.32E-69 | Neurons | RRAS2 | 0.07 |
| AEBP2 | 9.26E-72 | 0.25 | 0.48 | 0.08 | 2.15E-67 | Neurons | AEBP2 | 0.08 |
| IQCG | 1.65E-70 | 0.40 | 0.50 | 0.09 | 3.84E-66 | Neurons | IQCG | 0.09 |
| LDLRAD34 | 6.81E-70 | 0.30 | 0.49 | 0.09 | 1.58E-65 | Neurons | LDLRAD3 | 0.09 |
| NPL4 | 5.83E-69 | 0.27 | 0.41 | 0.06 | 1.35E-64 | Neurons | NPL | 0.06 |
| MRPS172 | 6.74E-69 | 0.35 | 0.47 | 0.08 | 1.56E-64 | Neurons | MRPS17 | 0.08 |
| RENBP5 | 1.14E-68 | 0.34 | 0.41 | 0.06 | 2.64E-64 | Neurons | RENBP | 0.07 |
| PRTFDC11 | 1.46E-68 | 0.32 | 0.44 | 0.07 | 3.40E-64 | Neurons | PRTFDC1 | 0.08 |
| NEDD1 | 1.54E-68 | 0.47 | 0.46 | 0.08 | 3.57E-64 | Neurons | NEDD1 | 0.08 |
| VCAM12 | 3.10E-68 | 0.39 | 0.42 | 0.07 | 7.20E-64 | Neurons | VCAM1 | 0.07 |
| LRRC611 | 3.17E-68 | 0.29 | 0.47 | 0.08 | 7.36E-64 | Neurons | LRRC61 | 0.08 |
| CCDC28B1 | 1.86E-67 | 0.50 | 0.49 | 0.09 | 4.31E-63 | Neurons | CCDC28B | 0.10 |
| BCL11A4 | 2.14E-64 | 0.39 | 0.45 | 0.08 | 4.96E-60 | Neurons | BCL11A | 0.08 |
| CLMP3 | 4.25E-63 | 0.35 | 0.41 | 0.07 | 9.87E-59 | Neurons | CLMP | 0.07 |
| GSTO23 | 3.36E-60 | 0.29 | 0.43 | 0.08 | 7.79E-56 | Neurons | GSTO2 | 0.08 |
| EEF1E1 | 7.13E-60 | 0.35 | 0.42 | 0.08 | 1.66E-55 | Neurons | EEF1E1 | 0.08 |
| NCALD | 1.09E-59 | 0.27 | 0.41 | 0.07 | 2.53E-55 | Neurons | NCALD | 0.07 |
| GSTA41 | 1.77E-59 | 0.41 | 0.45 | 0.09 | 4.10E-55 | Neurons | GSTA4 | 0.09 |
| PRR4 | 5.66E-59 | 0.36 | 0.43 | 0.08 | 1.31E-54 | Neurons | PRR4 | 0.08 |
| DEAF1 | 7.10E-58 | 0.35 | 0.47 | 0.09 | 1.65E-53 | Neurons | DEAF1 | 0.10 |
| C11orf74 | 4.65E-55 | 0.34 | 0.42 | 0.08 | 1.08E-50 | Neurons | C11orf74 | 0.08 |
| RP11-620J15.31 | 4.03E-54 | 0.43 | 0.45 | 0.09 | 9.35E-50 | Neurons | RP11-620J15.3 | 0.09 |
| SOX95 | 5.94E-52 | 0.50 | 0.45 | 0.10 | 1.38E-47 | Neurons | SOX9 | 0.10 |
| MCM41 | 2.82E-51 | 0.35 | 0.42 | 0.08 | 6.55E-47 | Neurons | MCM4 | 0.09 |
| PDCD11 | 1.28E-48 | 0.27 | 0.42 | 0.09 | 2.98E-44 | Neurons | PDCD11 | 0.09 |
| HAUS6 | 5.55E-48 | 0.28 | 0.41 | 0.08 | 1.29E-43 | Neurons | HAUS6 | 0.08 |
| DHX40 | 1.70E-47 | 0.25 | 0.43 | 0.09 | 3.94E-43 | Neurons | DHX40 | 0.09 |
| FAM13A2 | 6.13E-46 | 0.33 | 0.42 | 0.09 | 1.42E-41 | Neurons | FAM13A | 0.09 |
| CXCL13 | 0 | 3.58 | 0.41 | 0.07 | 0 | TCell2 | CXCL13 | 0.10 |
| ICOS | 0 | 1.68 | 0.49 | 0.07 | 0 | TCell2 | ICOS | 0.10 |
| MKI671 | 0 | 2.54 | 0.72 | 0.03 | 0 | TCell6 | MKI67 | 0.05 |
| CXCL132 | 0 | 2.47 | 0.59 | 0.09 | 0 | TCell6 | CXCL13 | 0.10 |
| TYMS2 | 0 | 2.32 | 0.77 | 0.06 | 0 | TCell6 | TYMS | 0.08 |
| UBE2C4 | 0 | 2.16 | 0.61 | 0.05 | 0 | TCell6 | UBE2C | 0.06 |
| RRM2 | 0 | 2.14 | 0.61 | 0.02 | 0 | TCell6 | RRM2 | 0.04 |
| TOP2A3 | 0 | 1.98 | 0.60 | 0.03 | 0 | TCell6 | TOP2A | 0.04 |
| CENPF2 | 0 | 1.93 | 0.60 | 0.06 | 0 | TCell6 | CENPF | 0.07 |
| ASPM1 | 0 | 1.81 | 0.52 | 0.02 | 0 | TCell6 | ASPM | 0.03 |
| NUSAP12 | 0 | 1.78 | 0.62 | 0.04 | 0 | TCell6 | NUSAP1 | 0.05 |
| CDK13 | 0 | 1.51 | 0.54 | 0.04 | 0 | TCell6 | CDK1 | 0.04 |
| BIRC53 | 0 | 1.48 | 0.54 | 0.04 | 0 | TCell6 | BIRC5 | 0.05 |
| KIAA01012 | 0 | 1.43 | 0.47 | 0.04 | 0 | TCell6 | KIAA0101 | 0.05 |
| TPX22 | 0 | 1.43 | 0.53 | 0.04 | 0 | TCell6 | TPX2 | 0.05 |
| CCNA2 | 0 | 1.41 | 0.51 | 0.02 | 0 | TCell6 | CCNA2 | 0.03 |
| ZWINT1 | 0 | 1.41 | 0.62 | 0.04 | 0 | TCell6 | ZWINT | 0.05 |
| CLSPN | 0 | 1.33 | 0.55 | 0.02 | 0 | TCell6 | CLSPN | 0.03 |
| CDT1 | 0 | 1.32 | 0.54 | 0.04 | 0 | TCell6 | CDT1 | 0.05 |
| CDKN31 | 0 | 1.29 | 0.52 | 0.04 | 0 | TCell6 | CDKN3 | 0.05 |
| ASF1B | 0 | 1.25 | 0.55 | 0.03 | 0 | TCell6 | ASF1B | 0.04 |
| UHRF1 | 0 | 1.19 | 0.46 | 0.02 | 0 | TCell6 | UHRF1 | 0.03 |
| CENPM | 0 | 1.18 | 0.57 | 0.06 | 0 | TCell6 | CENPM | 0.07 |
| GTSE1 | 0 | 1.14 | 0.45 | 0.02 | 0 | TCell6 | GTSE1 | 0.03 |
| KIFC1 | 0 | 1.14 | 0.43 | 0.02 | 0 | TCell6 | KIFC1 | 0.03 |
| EZH2 | 0 | 1.13 | 0.54 | 0.06 | 0 | TCell6 | EZH2 | 0.07 |
| FEN12 | 0 | 1.11 | 0.51 | 0.07 | 0 | TCell6 | FEN1 | 0.08 |
| CENPK | 0 | 1.09 | 0.56 | 0.06 | 0 | TCell6 | CENPK | 0.07 |
| TK13 | 0 | 1.09 | 0.49 | 0.06 | 0 | TCell6 | TK1 | 0.07 |
| DHFR | 0 | 1.07 | 0.49 | 0.06 | 0 | TCell6 | DHFR | 0.07 |
| CDCA8 | 0 | 1.07 | 0.44 | 0.02 | 0 | TCell6 | CDCA8 | 0.03 |
| UBE2T4 | 0 | 1.06 | 0.53 | 0.07 | 0 | TCell6 | UBE2T | 0.08 |
| CENPN | 0 | 1.06 | 0.53 | 0.06 | 0 | TCell6 | CENPN | 0.07 |
| CENPW4 | 0 | 1.05 | 0.57 | 0.09 | 0 | TCell6 | CENPW | 0.10 |
| CASC5 | 0 | 1.04 | 0.41 | 0.02 | 0 | TCell6 | CASC5 | 0.02 |
| CENPU1 | 0 | 1.04 | 0.50 | 0.05 | 0 | TCell6 | CENPU | 0.06 |
| MAD2L12 | 0 | 1.03 | 0.52 | 0.05 | 0 | TCell6 | MAD2L1 | 0.06 |
| TCF191 | 0 | 1.02 | 0.49 | 0.07 | 0 | TCell6 | TCF19 | 0.08 |
| RAD51AP11 | 0 | 0.94 | 0.44 | 0.04 | 0 | TCell6 | RAD51AP1 | 0.05 |
| FANCI | 0 | 0.92 | 0.45 | 0.04 | 0 | TCell6 | FANCI | 0.04 |
| CDCA5 | 0 | 0.91 | 0.42 | 0.02 | 0 | TCell6 | CDCA5 | 0.03 |
| NDC80 | 0 | 0.88 | 0.41 | 0.03 | 0 | TCell6 | NDC80 | 0.04 |
| PRC11 | 0 | 0.85 | 0.41 | 0.05 | 0 | TCell6 | PRC1 | 0.05 |
| BRCA1 | 0 | 0.85 | 0.40 | 0.03 | 0 | TCell6 | BRCA1 | 0.03 |
| HELLS | 9.42E-285 | 0.99 | 0.46 | 0.07 | 2.19E-280 | TCell6 | HELLS | 0.07 |
| KIF20B1 | 1.12E-280 | 1.15 | 0.51 | 0.08 | 2.60E-276 | TCell6 | KIF20B | 0.09 |
| CDCA71 | 3.81E-278 | 1.02 | 0.42 | 0.06 | 8.84E-274 | TCell6 | CDCA7 | 0.06 |
| PHF191 | 1.09E-277 | 1.10 | 0.54 | 0.09 | 2.52E-273 | TCell6 | PHF19 | 0.10 |
| IFNG | 8.53E-257 | 1.31 | 0.44 | 0.06 | 1.98E-252 | TCell6 | IFNG | 0.07 |
| GMNN1 | 1.18E-235 | 0.88 | 0.47 | 0.08 | 2.73E-231 | TCell6 | GMNN | 0.09 |
| GINS21 | 1.17E-223 | 0.94 | 0.42 | 0.07 | 2.72E-219 | TCell6 | GINS2 | 0.07 |
| MIR155HG1 | 1.34E-186 | 1.15 | 0.45 | 0.08 | 3.10E-182 | TCell6 | MIR155HG | 0.09 |
| CD386 | 8.29E-174 | 0.88 | 0.46 | 0.09 | 1.92E-169 | TCell6 | CD38 | 0.10 |
| MCM6 | 5.71E-173 | 0.76 | 0.41 | 0.08 | 1.33E-168 | TCell6 | MCM6 | 0.09 |
| LIG1 | 1.31E-163 | 0.73 | 0.42 | 0.08 | 3.05E-159 | TCell6 | LIG1 | 0.09 |
| RFC4 | 1.21E-140 | 0.66 | 0.41 | 0.09 | 2.80E-136 | TCell6 | RFC4 | 0.10 |
| TOX1 | 7.75E-135 | 0.70 | 0.42 | 0.09 | 1.80E-130 | TCell6 | TOX | 0.10 |
| GNLY3 | 0 | 4.58 | 0.87 | 0.07 | 0 | TCell7 | GNLY | 0.09 |
| XCL21 | 0 | 2.98 | 0.61 | 0.04 | 0 | TCell7 | XCL2 | 0.05 |
| XCL11 | 0 | 2.92 | 0.57 | 0.04 | 0 | TCell7 | XCL1 | 0.05 |
| TRDC | 0 | 2.88 | 0.69 | 0.02 | 0 | TCell7 | TRDC | 0.03 |
| KLRD1 | 0 | 2.70 | 0.79 | 0.06 | 0 | TCell7 | KLRD1 | 0.07 |
| KLRC1 | 0 | 2.55 | 0.54 | 0.02 | 0 | TCell7 | KLRC1 | 0.03 |
| MATK3 | 0 | 2.09 | 0.70 | 0.08 | 0 | TCell7 | MATK | 0.09 |
| KLRF1 | 0 | 1.82 | 0.43 | 0.00 | 0 | TCell7 | KLRF1 | 0.01 |
| SH2D1B | 0 | 1.78 | 0.49 | 0.00 | 0 | TCell7 | SH2D1B | 0.01 |
| PTGDR | 0 | 1.59 | 0.48 | 0.04 | 0 | TCell7 | PTGDR | 0.05 |
| TXK | 0 | 1.41 | 0.43 | 0.03 | 0 | TCell7 | TXK | 0.04 |
| SAMD32 | 5.76E-200 | 1.26 | 0.50 | 0.09 | 1.34E-195 | TCell7 | SAMD3 | 0.09 |
| HBA2 | 0 | 6.58 | 0.98 | 0.01 | 0 | TCell8 | HBA2 | 0.01 |
| HBA1 | 0 | 5.06 | 0.94 | 0.01 | 0 | TCell8 | HBA1 | 0.01 |
| HBD | 0 | 3.66 | 0.91 | 0.00 | 0 | TCell8 | HBD | 0.00 |
| HBB1 | 7.78E-181 | 9.44 | 1.00 | 0.07 | 1.81E-176 | TCell8 | HBB | 0.07 |
| RGS5 | 0 | 4.20 | 0.59 | 0.02 | 0 | Tissue_stem_cells | RGS5 | 0.03 |
| COL4A11 | 0 | 3.16 | 0.66 | 0.07 | 0 | Tissue_stem_cells | COL4A1 | 0.09 |
| NOTCH32 | 0 | 2.89 | 0.74 | 0.06 | 0 | Tissue_stem_cells | NOTCH3 | 0.08 |
| NDUFA4L21 | 0 | 2.82 | 0.62 | 0.08 | 0 | Tissue_stem_cells | NDUFA4L2 | 0.10 |
| MCAM1 | 0 | 2.49 | 0.70 | 0.05 | 0 | Tissue_stem_cells | MCAM | 0.07 |
| TINAGL12 | 0 | 2.37 | 0.68 | 0.06 | 0 | Tissue_stem_cells | TINAGL1 | 0.08 |
| STEAP41 | 0 | 2.29 | 0.42 | 0.03 | 0 | Tissue_stem_cells | STEAP4 | 0.04 |
| MYH111 | 0 | 2.28 | 0.41 | 0.06 | 0 | Tissue_stem_cells | MYH11 | 0.06 |
| PPP1R14A2 | 0 | 2.22 | 0.65 | 0.03 | 0 | Tissue_stem_cells | PPP1R14A | 0.05 |
| PLAC92 | 0 | 2.19 | 0.68 | 0.08 | 0 | Tissue_stem_cells | PLAC9 | 0.10 |
| CSRP23 | 0 | 1.91 | 0.60 | 0.07 | 0 | Tissue_stem_cells | CSRP2 | 0.08 |
| EDNRA1 | 0 | 1.81 | 0.65 | 0.05 | 0 | Tissue_stem_cells | EDNRA | 0.06 |
| C1QTNF11 | 0 | 1.78 | 0.53 | 0.06 | 0 | Tissue_stem_cells | C1QTNF1 | 0.07 |
| JAG12 | 0 | 1.78 | 0.63 | 0.07 | 0 | Tissue_stem_cells | JAG1 | 0.09 |
| SEPT4 | 0 | 1.77 | 0.61 | 0.06 | 0 | Tissue_stem_cells | SEPT4 | 0.08 |
| SYNPO23 | 0 | 1.76 | 0.50 | 0.05 | 0 | Tissue_stem_cells | SYNPO2 | 0.07 |
| CCDC102B | 0 | 1.74 | 0.49 | 0.03 | 0 | Tissue_stem_cells | CCDC102B | 0.04 |
| GGT53 | 0 | 1.69 | 0.52 | 0.07 | 0 | Tissue_stem_cells | GGT5 | 0.08 |
| PLXDC12 | 0 | 1.68 | 0.45 | 0.08 | 0 | Tissue_stem_cells | PLXDC1 | 0.09 |
| CD2482 | 0 | 1.67 | 0.50 | 0.06 | 0 | Tissue_stem_cells | CD248 | 0.08 |
| TFPI2 | 0 | 1.66 | 0.56 | 0.06 | 0 | Tissue_stem_cells | TFPI | 0.07 |
| OLFML2B2 | 0 | 1.63 | 0.52 | 0.08 | 0 | Tissue_stem_cells | OLFML2B | 0.10 |
| COX4I2 | 0 | 1.60 | 0.44 | 0.00 | 0 | Tissue_stem_cells | COX4I2 | 0.01 |
| COL14A12 | 0 | 1.60 | 0.53 | 0.06 | 0 | Tissue_stem_cells | COL14A1 | 0.08 |
| ABCC9 | 0 | 1.58 | 0.48 | 0.01 | 0 | Tissue_stem_cells | ABCC9 | 0.02 |
| DKK32 | 0 | 1.54 | 0.66 | 0.08 | 0 | Tissue_stem_cells | DKK3 | 0.09 |
| SMOC22 | 0 | 1.51 | 0.53 | 0.08 | 0 | Tissue_stem_cells | SMOC2 | 0.10 |
| RASL11A | 0 | 1.51 | 0.47 | 0.02 | 0 | Tissue_stem_cells | RASL11A | 0.04 |
| LMOD1 | 0 | 1.49 | 0.50 | 0.03 | 0 | Tissue_stem_cells | LMOD1 | 0.04 |
| SLIT32 | 0 | 1.48 | 0.48 | 0.07 | 0 | Tissue_stem_cells | SLIT3 | 0.08 |
| GUCY1A3 | 0 | 1.47 | 0.56 | 0.05 | 0 | Tissue_stem_cells | GUCY1A3 | 0.06 |
| SNCG3 | 0 | 1.46 | 0.44 | 0.04 | 0 | Tissue_stem_cells | SNCG | 0.05 |
| GUCY1B3 | 0 | 1.46 | 0.55 | 0.03 | 0 | Tissue_stem_cells | GUCY1B3 | 0.04 |
| ANGPT21 | 0 | 1.46 | 0.48 | 0.02 | 0 | Tissue_stem_cells | ANGPT2 | 0.03 |
| OLFML2A2 | 0 | 1.41 | 0.41 | 0.04 | 0 | Tissue_stem_cells | OLFML2A | 0.05 |
| CARMN | 0 | 1.41 | 0.47 | 0.02 | 0 | Tissue_stem_cells | CARMN | 0.04 |
| GPX34 | 0 | 1.36 | 0.42 | 0.06 | 0 | Tissue_stem_cells | GPX3 | 0.07 |
| PGF | 0 | 1.32 | 0.46 | 0.03 | 0 | Tissue_stem_cells | PGF | 0.04 |
| DLC14 | 0 | 1.31 | 0.51 | 0.08 | 0 | Tissue_stem_cells | DLC1 | 0.10 |
| CDH6 | 0 | 1.31 | 0.44 | 0.00 | 0 | Tissue_stem_cells | CDH6 | 0.01 |
| FOXS1 | 0 | 1.29 | 0.43 | 0.01 | 0 | Tissue_stem_cells | FOXS1 | 0.02 |
| ADGRF51 | 0 | 1.28 | 0.44 | 0.03 | 0 | Tissue_stem_cells | ADGRF5 | 0.04 |
| ARHGEF171 | 0 | 1.24 | 0.49 | 0.06 | 0 | Tissue_stem_cells | ARHGEF17 | 0.07 |
| FAM13C1 | 0 | 1.20 | 0.41 | 0.02 | 0 | Tissue_stem_cells | FAM13C | 0.03 |
| MRVI11 | 0 | 1.18 | 0.47 | 0.04 | 0 | Tissue_stem_cells | MRVI1 | 0.05 |
| EBF12 | 0 | 1.15 | 0.50 | 0.05 | 0 | Tissue_stem_cells | EBF1 | 0.06 |
| PDGFA | 0 | 1.13 | 0.48 | 0.04 | 0 | Tissue_stem_cells | PDGFA | 0.05 |
| NEURL1B1 | 0 | 1.13 | 0.41 | 0.03 | 0 | Tissue_stem_cells | NEURL1B | 0.04 |
| EGFLAM1 | 0 | 1.10 | 0.41 | 0.03 | 0 | Tissue_stem_cells | EGFLAM | 0.04 |
| ANO1 | 0 | 1.09 | 0.42 | 0.03 | 0 | Tissue_stem_cells | ANO1 | 0.04 |
| PARM11 | 0 | 1.06 | 0.41 | 0.03 | 0 | Tissue_stem_cells | PARM1 | 0.04 |
| ESAM1 | 0 | 1.02 | 0.44 | 0.04 | 0 | Tissue_stem_cells | ESAM | 0.05 |
| RASL12 | 0 | 1.02 | 0.42 | 0.03 | 0 | Tissue_stem_cells | RASL12 | 0.04 |
| LRRC32 | 0 | 1.01 | 0.41 | 0.04 | 0 | Tissue_stem_cells | LRRC32 | 0.05 |
| PRKG12 | 0 | 0.94 | 0.40 | 0.04 | 0 | Tissue_stem_cells | PRKG1 | 0.05 |
| VASN2 | 0 | 0.92 | 0.40 | 0.06 | 0 | Tissue_stem_cells | VASN | 0.07 |
| NTRK22 | 4.07E-254 | 1.25 | 0.42 | 0.08 | 9.44E-250 | Tissue_stem_cells | NTRK2 | 0.09 |
| CRISPLD22 | 2.97E-234 | 0.97 | 0.43 | 0.09 | 6.91E-230 | Tissue_stem_cells | CRISPLD2 | 0.09 |

Note："P_val" represented the p-value obtained from hypothesis testing between two cell clusters using a Wilcoxon Rank Sum test, while "P_val_adj" indicated the adjusted p value based on Bonferroni correction, considering all features in the dataset. "avg_log2FC" denoted the log-scaled fold-change of the average expression between the two clusters. More positive values indicated that the feature was more highly expressed in the first group. "pct.1" signified the percentage of cells in which a specific SSM was detected in the first cluster (referred to as the subcluster to which the particular SSM belonged, defined as "cluster" in the column header). "pct_1.5" represented the percentage of cells where the certain SSM was detected in the second cluster, defined as "cluster_1.5" in the column headers. "pct.2" was the percentage of cells where the certain SSM was detected in all clusters except for the first cluster.

**Supplementary Table 2:The results of the Schoenfeld residual test**

|  | chisq | df | p |
| --- | --- | --- | --- |
| JCHAIN | 2.07 | 1 | 0.15 |
| CD79A | 2.27 | 1 | 0.13 |
| MS4A1 | 1.399 | 1 | 0.24 |
| HLA-DOB | 0.129 | 1 | 0.72 |
| GLOBAL | 3.256 | 4 | 0.52 |

**Supplementary Table 3: The C-index of risk model in training set (TCGA-BRCA) and validation sets (GSE20685, GSE42568, and GSE88770).**

|  | Training set | Validation sets | | |
| --- | --- | --- | --- | --- |
| Dataset | TCGA-BRCA | GSE20685 | GSE42568 | GSE88770 |
| C-index | 0.6753766 | 0.7043676 | 0.6646298 | 0.7461832 |

**Supplementary Box S1: 53 SSMs of the 6 B cell subclusters**

|  | SSMs |
| --- | --- |
| 1 | IGJ |
| 2 | IGLL5 |
| 3 | CD79A |
| 4 | POU2AF1 |
| 5 | TXNDC5 |
| 6 | FCRL5 |
| 7 | TNFRSF17 |
| 8 | CD38 |
| 9 | JSRP1 |
| 10 | IRF4 |
| 11 | SPAG4 |
| 12 | CPNE5 |
| 13 | SLAMF7 |
| 14 | EAF2 |
| 15 | MEI1 |
| 16 | MS4A1 |
| 17 | BANK1 |
| 18 | VPREB3 |
| 19 | CD19 |
| 20 | ADAM28 |
| 21 | ARHGAP24 |
| 22 | BLK |
| 23 | FCRLA |
| 24 | HVCN1 |
| 25 | IRF8 |
| 26 | TNFRSF13B |
| 27 | LY86 |
| 28 | TLR10 |
| 29 | MARCHF1 |
| 30 | AIM2 |
| 31 | PARP15 |
| 32 | SYK |
| 33 | TCL1A |
| 34 | FCER2 |
| 35 | CD72 |
| 36 | CD22 |
| 37 | FCRL1 |
| 38 | PAX5 |
| 39 | BACH2 |
| 40 | GAPT |
| 41 | HLA-DOB |
| 42 | BTK |
| 43 | AFF3 |
| 44 | CIITA |
| 45 | PHACTR1 |
| 46 | HLA-DOA |
| 47 | LAX1 |
| 48 | P2RX1 |
| 49 | PTCH2 |
| 50 | RHBDD1 |
| 51 | RAB30 |
| 52 | EIF2AK3 |
| 53 | KCNN3 |
